# Supplementary material for: Bioinformatic analysis of cis-regulatory interactions between progesterone and estrogen receptors in breast cancer
Source: PeerJ. 2014 Nov 18;2:e654. doi: 10.7717/peerj.654 (PMC4243336; doi:10.7717/peerj.654)
Supplement: File S1 [file peerj-02-654-s001.xlsx]

## Sheet: GO Biological Process
# GREAT version 2.0.2	Species assembly: hg19	Association rule: Basal+extension: 5000 bp upstream, 1000 bp downstream, 1000000 bp max extension, curated regulatory domains included
# Ontology summary statistics are provided in the footer.
#
# Ontology	ID	Desc	BinomRank	BinomP	BinomBonfP	HyperP	HyperBonfP	ObsGenes	Regions	Genes
GO Biological Process	GO:0002064	epithelial cell development	32	5.28995e-21	4.63452e-17	7.35391e-06	0.0644276	30	chr10:8126512-8127523,chr10:8170051-8171135,chr10:8449335-8450208,chr10:8585746-8586933,chr10:8636602-8637293,chr10:8786585-8786871,chr10:8794045-8795057,chr10:8952087-8953900,chr10:8993132-8994176,chr10:9076049-9076859,chr10:9078509-9079239,chr10:9079586-9080897,chr10:9093293-9094027,chr11:101163125-101164195,chr11:101169678-101170762,chr11:101170808-101171125,chr11:101171228-101172045,chr11:101…	AGT,B4GALT1,BASP1,BCL11B,BMP4,CITED1,COL18A1,DICER1,ESR1,FOXA1,GATA3,GDNF,GJA1,GREM1,GSTM3,HEG1,KCNE1,ONECUT1,PDE4D,PGR,RAC1,SHROOM3,SPDEF,TFAP2A,TFAP2C,TP63,VEZF1,WNT7B,WT1,XBP1
GO Biological Process	GO:0051897	positive regulation of protein kinase B signaling cascade	38	2.99447e-20	2.62345e-16	0.00216417	1	18	chr10:114564102-114564492,chr10:8126512-8127523,chr10:8170051-8171135,chr10:8449335-8450208,chr10:8585746-8586933,chr10:8636602-8637293,chr10:8786585-8786871,chr10:8794045-8795057,chr10:8952087-8953900,chr10:8993132-8994176,chr10:9076049-9076859,chr10:9078509-9079239,chr10:9079586-9080897,chr10:9093293-9094027,chr11:48019886-48020741,chr11:48063372-48063962,chr11:48071356-48071971,chr11:48075735-…	ANGPT1,CCR7,EGFR,F3,GATA3,IGF1,IGF1R,IGFBP5,IL6,INSR,MTDH,NOX4,PTPRJ,SPRY2,TCF7L2,TGFBR1,THBS1,TSPYL5
GO Biological Process	GO:0045834	positive regulation of lipid metabolic process	134	3.2461e-13	2.84391e-09	0.000410649	1	30	chr10:104528941-104530132,chr10:97233982-97234874,chr11:116941903-116942518,chr11:819074-819075,chr11:820182-820353,chr13:109511459-109512441,chr13:109739811-109740828,chr13:109895679-109896250,chr13:109909337-109909758,chr13:110161818-110162442,chr13:110228551-110229309,chr13:110237225-110237502,chr13:110296317-110296924,chr13:110395976-110396497,chr13:29005965-29006452,chr15:98998961-98999775,c…	ABCG1,AGT,APOA1,CCR7,CYP17A1,EPHA8,FGF1,FGF2,FGFR3,FLT1,GHSR,IGF1R,IRS1,IRS2,KIT,LDLRAP1,MID1IP1,NOD2,PDGFB,PNPLA2,PPARA,PPARGC1A,PRKAA1,PRKCD,PRKCE,RAC1,SORBS1,SREBF1,VAV2,VAV3
GO Biological Process	GO:0043551	regulation of phosphatidylinositol 3-kinase activity	140	5.98101e-13	5.23996e-09	0.000110012	0.963817	13	chr13:29005965-29006452,chr16:50739675-50740690,chr17:38705216-38706129,chr17:38707876-38707933,chr17:38707951-38708503,chr17:38708631-38709230,chr17:38711534-38712284,chr17:38738094-38739311,chr17:38762590-38763663,chr17:38773765-38774741,chr17:38774824-38775833,chr1:108135637-108137028,chr1:108168788-108169593,chr1:108186218-108186893,chr1:108219032-108219568,chr1:108281089-108281981,chr1:10830…	CCR7,EPHA8,FGF2,FGFR3,FLT1,IRS1,KIT,NOD2,PDGFB,PIK3R1,RAC1,VAV2,VAV3
GO Biological Process	GO:0043552	positive regulation of phosphatidylinositol 3-kinase activity	165	4.4194e-12	3.87183e-08	0.000166646	1	12	chr13:29005965-29006452,chr16:50739675-50740690,chr17:38705216-38706129,chr17:38707876-38707933,chr17:38707951-38708503,chr17:38708631-38709230,chr17:38711534-38712284,chr17:38738094-38739311,chr17:38762590-38763663,chr17:38773765-38774741,chr17:38774824-38775833,chr1:108135637-108137028,chr1:108168788-108169593,chr1:108186218-108186893,chr1:108219032-108219568,chr1:108281089-108281981,chr1:10830…	CCR7,EPHA8,FGF2,FGFR3,FLT1,IRS1,KIT,NOD2,PDGFB,RAC1,VAV2,VAV3
GO Biological Process	GO:0090218	positive regulation of lipid kinase activity	171	7.75635e-12	6.79534e-08	0.000314523	1	12	chr13:29005965-29006452,chr16:50739675-50740690,chr17:38705216-38706129,chr17:38707876-38707933,chr17:38707951-38708503,chr17:38708631-38709230,chr17:38711534-38712284,chr17:38738094-38739311,chr17:38762590-38763663,chr17:38773765-38774741,chr17:38774824-38775833,chr1:108135637-108137028,chr1:108168788-108169593,chr1:108186218-108186893,chr1:108219032-108219568,chr1:108281089-108281981,chr1:10830…	CCR7,EPHA8,FGF2,FGFR3,FLT1,IRS1,KIT,NOD2,PDGFB,RAC1,VAV2,VAV3
GO Biological Process	GO:0050731	positive regulation of peptidyl-tyrosine phosphorylation	195	2.91792e-11	2.55639e-07	0.000196527	1	34	chr10:32649068-32649581,chr10:34506353-34506994,chr11:35317195-35317963,chr11:35385473-35385926,chr11:35411152-35412001,chr11:35412386-35413741,chr12:102896753-102897272,chr12:89078000-89078913,chr12:89144271-89145234,chr12:89151536-89152453,chr12:89195485-89196058,chr12:89229419-89230407,chr15:42217105-42218107,chr15:42219992-42220786,chr15:42221273-42222003,chr16:50739675-50740690,chr1:20701515…	ADNP,AGT,ANGPT1,CD44,EFNA5,EHD4,FGF10,FGFR3,GHR,HES1,HGF,IGF1,IL12A,IL12B,IL15,IL20,IL6,IL6ST,ITGB1,JAK2,KIT,KITLG,LIF,LOC284889,NOD2,NRP1,OSM,PAK2,PDGFB,PTK2B,RICTOR,SYK,TNK2,VEGFA
GO Biological Process	GO:0043550	regulation of lipid kinase activity	211	9.74069e-11	8.53382e-07	0.00153112	1	13	chr13:29005965-29006452,chr16:50739675-50740690,chr17:38705216-38706129,chr17:38707876-38707933,chr17:38707951-38708503,chr17:38708631-38709230,chr17:38711534-38712284,chr17:38738094-38739311,chr17:38762590-38763663,chr17:38773765-38774741,chr17:38774824-38775833,chr1:108135637-108137028,chr1:108168788-108169593,chr1:108186218-108186893,chr1:108219032-108219568,chr1:108281089-108281981,chr1:10830…	CCR7,EPHA8,FGF2,FGFR3,FLT1,IRS1,KIT,NOD2,PDGFB,PIK3R1,RAC1,VAV2,VAV3
GO Biological Process	GO:0060740	prostate gland epithelium morphogenesis	261	1.83604e-09	1.60855e-05	0.000606788	1	13	chr10:122705517-122705929,chr10:122814479-122814848,chr10:123273904-123274446,chr11:35317195-35317963,chr11:35385473-35385926,chr11:35411152-35412001,chr11:35412386-35413741,chr12:102896753-102897272,chr12:69833366-69834817,chr12:69899201-69899483,chr14:37905639-37906291,chr14:38015530-38016913,chr14:38057154-38057589,chr14:38111399-38111879,chr14:53771725-53772223,chr14:54404835-54405711,chr15:9…	AR,BMP4,CD44,ESR1,FGFR2,FOXA1,FRS2,GLI2,IGF1,IGF1R,NOG,SOX9,TP63
GO Biological Process	GO:0060512	prostate gland morphogenesis	273	2.39249e-09	2.09606e-05	0.000981369	1	13	chr10:122705517-122705929,chr10:122814479-122814848,chr10:123273904-123274446,chr11:35317195-35317963,chr11:35385473-35385926,chr11:35411152-35412001,chr11:35412386-35413741,chr12:102896753-102897272,chr12:69833366-69834817,chr12:69899201-69899483,chr14:37905639-37906291,chr14:38015530-38016913,chr14:38057154-38057589,chr14:38111399-38111879,chr14:53771725-53772223,chr14:54404835-54405711,chr15:9…	AR,BMP4,CD44,ESR1,FGFR2,FOXA1,FRS2,GLI2,IGF1,IGF1R,NOG,SOX9,TP63
#
# Ontology	TermsTested	MinAnnotCount		MaxAnnotCount
#
# GO Biological Process	8761	1		Inf

## Sheet: Pathway Commons
# GREAT version 2.0.2	Species assembly: hg19	Association rule: Basal+extension: 5000 bp upstream, 1000 bp downstream, 1000000 bp max extension, curated regulatory domains included
# Ontology summary statistics are provided in the footer.
#
# Ontology	ID	Desc	BinomRank	BinomP	BinomBonfP	HyperP	HyperBonfP	ObsGenes	Regions	Genes
Pathway Commons	517105	Validated nuclear estrogen receptor alpha network	40	5.77765e-37	9.28469e-34	0.0018284	1	24	chr10:98623382-98624437,chr11:101163125-101164195,chr11:101169678-101170762,chr11:101170808-101171125,chr11:101171228-101172045,chr11:101177343-101177896,chr11:101196526-101197840,chr11:101198824-101199132,chr11:101202024-101202602,chr11:101205165-101206155,chr11:101206446-101208195,chr11:101222422-101223169,chr11:101225105-101226192,chr11:101228308-101229366,chr11:101306910-101308243,chr11:10131…	AP1B1,ATP5J,C10orf12,CALCOCO1,CCND1,CD82,CEBPB,COL18A1,CTSD,DSCAM,EBAG9,ESR1,GREB1,HDAC4,HSF2,LMO4,MTA1,MYC,NCOA3,NCOR2,NRIP1,PGR,PRDM15,XBP1
Pathway Commons	517173	FOXA1 transcription factor network	46	1.60338e-19	2.57663e-16	1.05553e-06	0.00169624	24	chr10:81486403-81486896,chr11:62267578-62268223,chr11:62275575-62276629,chr14:37905639-37906291,chr14:38015530-38016913,chr14:38057154-38057589,chr14:38111399-38111879,chr14:75721565-75722200,chr14:75722668-75722855,chr14:75730553-75731195,chr14:94822679-94823499,chr14:94841951-94842773,chr14:94856646-94857694,chr14:94870463-94871353,chr14:94878579-94878638,chr14:94879078-94879750,chr15:96133336-…	AP1B1,AR,ATP5J,CEBPB,COL18A1,DSCAM,ESR1,FOS,FOXA1,FOXA2,FOXA3,NCOA3,NFIA,NFIB,NFIC,NR2F2,NRIP1,PISD,PRDM15,SCGB1A1,SERPINA1,SFTPA1,SFTPD,XBP1
Pathway Commons	517023	IL6-mediated signaling events	51	2.67068e-17	4.29178e-14	0.000227423	0.365469	21	chr11:77970462-77971734,chr11:78001255-78001714,chr11:78006041-78006891,chr11:78022805-78023467,chr13:41327509-41328103,chr14:75721565-75722200,chr14:75722668-75722855,chr14:75730553-75731195,chr15:68207724-68208352,chr1:145543585-145544372,chr1:65338069-65338490,chr1:65344467-65345398,chr1:65363751-65364139,chr1:65364156-65364683,chr1:65366584-65366972,chr1:88153457-88154340,chr1:88183600-881846…	BCL2L1,CEBPB,CEBPD,FOS,FOXO1,GAB2,HCK,IL6,IL6ST,IRF1,JAK1,JAK2,LMO4,MAPK14,MITF,MYC,PIAS1,PIAS3,PIK3R1,PRKCD,RAC1
Pathway Commons	517048	FOXA transcription factor networks	53	4.20258e-17	6.75354e-14	8.23737e-07	0.00132375	37	chr10:81486403-81486896,chr11:116941903-116942518,chr11:17427169-17427736,chr11:62267578-62268223,chr11:62275575-62276629,chr14:37905639-37906291,chr14:38015530-38016913,chr14:38057154-38057589,chr14:38111399-38111879,chr14:75721565-75722200,chr14:75722668-75722855,chr14:75730553-75731195,chr14:94822679-94823499,chr14:94841951-94842773,chr14:94856646-94857694,chr14:94870463-94871353,chr14:9487857…	ABCC8,ALAS1,AP1B1,APOA1,AR,ATP5J,CEBPA,CEBPB,CEBPD,COL18A1,CREB1,DSCAM,ESR1,FOS,FOXA1,FOXA2,FOXA3,FOXF1,HADH,KCNJ11,NCOA3,NF1,NFIA,NFIB,NFIC,NR2F2,NR3C1,NRIP1,PISD,PRDM15,SCGB1A1,SERPINA1,SFTPA1,SFTPD,TAT,TFRC,XBP1
Pathway Commons	517138	C-MYB transcription factor network	55	2.42339e-16	3.89439e-13	0.00025035	0.402313	32	chr10:8126512-8127523,chr10:8170051-8171135,chr10:8449335-8450208,chr10:8585746-8586933,chr10:8636602-8637293,chr10:8786585-8786871,chr10:8794045-8795057,chr10:8952087-8953900,chr10:8993132-8994176,chr10:9076049-9076859,chr10:9078509-9079239,chr10:9079586-9080897,chr10:9093293-9094027,chr11:101991169-101991594,chr11:37109559-37110653,chr11:68873316-68874383,chr11:68889612-68890873,chr12:69833366-…	ATP2B1,BIRC3,CBX4,CCND1,CD34,CDK6,CEBPA,CEBPB,CEBPD,COL1A2,GATA3,HES1,HIPK2,IQGAP1,KIT,KITLG,LEF1,MAD1L1,MAT2A,MYB,MYC,NLK,PIAS3,PPP3CA,RAG2,SND1,TAB2,TFEC,TOM1,UBE2I,YEATS4,ZFHX3
Pathway Commons	485310	Effects of PIP2 hydrolysis	62	3.31293e-14	5.32388e-11	0.000166646	0.2678	12	chr10:6329303-6329714,chr10:6338420-6340599,chr10:6403738-6404297,chr10:6404415-6406057,chr10:6406707-6408059,chr10:6435932-6437170,chr10:6438093-6439407,chr10:6440881-6441874,chr10:6442036-6442654,chr10:6443343-6444064,chr10:7275181-7276168,chr11:101163125-101164195,chr11:101169678-101170762,chr11:101170808-101171125,chr11:101171228-101172045,chr11:101177343-101177896,chr11:101196526-101197840,c…	DAGLA,DAGLB,DGKB,DGKH,DGKI,DGKK,PRKCD,PRKCE,PRKCH,PRKCQ,TRPC6,TRPC7
Pathway Commons	485288	Platelet activation, signaling and aggregation	64	7.00376e-13	1.1255e-09	0.000966155	1	45	chr10:112866796-112867268,chr10:112867446-112867711,chr10:6329303-6329714,chr10:6338420-6340599,chr10:6403738-6404297,chr10:6404415-6406057,chr10:6406707-6408059,chr10:6435932-6437170,chr10:6438093-6439407,chr10:6440881-6441874,chr10:6442036-6442654,chr10:6443343-6444064,chr10:7275181-7276168,chr11:101163125-101164195,chr11:101169678-101170762,chr11:101170808-101171125,chr11:101171228-101172045,c…	ADRA2A,AP2B1,AP2S1,APOA1,ARRB1,BCAR1,CALM1,CALM2,CAP1,DAGLA,DAGLB,DGKB,DGKH,DGKI,DGKK,FYN,GAS6,GNA13,GNA14,GNAQ,GNB1,GRIP2,IGFBP3,LAMP2,LAT,MAPK14,MAPK3,P2RY1,PDPK1,PIK3R1,PRKCD,PRKCE,PRKCH,PRKCQ,PTK2,PTPN1,RAPGEF3,RHOB,SEPT5,SYK,TRPC6,TRPC7,VAV2,VAV3,YWHAZ
Pathway Commons	517065	HIF-1-alpha transcription factor network	65	1.54777e-12	2.48727e-09	0.000191784	0.308197	27	chr10:133829573-133830040,chr10:44349467-44350104,chr10:44668590-44669760,chr10:44740322-44740889,chr10:44749336-44749846,chr10:6329303-6329714,chr10:6338420-6340599,chr10:6403738-6404297,chr10:6404415-6406057,chr10:6406707-6408059,chr10:6435932-6437170,chr10:6438093-6439407,chr10:6440881-6441874,chr10:6442036-6442654,chr10:6443343-6444064,chr10:71092498-71093457,chr10:71120373-71120931,chr10:711…	ABCG2,ADM,ALDOA,BHLHE40,BNIP3,CITED2,CP,CREB1,CXCL12,EDN1,EGLN1,EGLN3,FOS,HIF1A,HK1,HMOX1,ID2,ITGB2,NDRG1,NOS2,NT5E,PFKFB3,RORA,SLC2A1,TFF3,TFRC,VEGFA
Pathway Commons	517031	Integrins in angiogenesis	74	1.57974e-10	2.53864e-07	0.000745206	1	25	chr10:49495715-49496499,chr11:35317195-35317963,chr11:35385473-35385926,chr11:35411152-35412001,chr11:35412386-35413741,chr12:102896753-102897272,chr12:120669022-120670000,chr12:120672140-120672982,chr14:35872963-35873486,chr14:75721565-75722200,chr14:75722668-75722855,chr14:75730553-75731195,chr15:98998961-98999775,chr15:99294960-99295556,chr15:99301503-99301792,chr15:99332008-99332567,chr15:993…	BCAR1,CD44,CSF1,FGF2,FN1,FOS,IGF1,IGF1R,IRS1,KDR,MAP3K1,MAPK3,MAPK8,NFKBIA,PIK3R1,PTK2,PTK2B,PXN,RAC1,ROCK1,SDC1,SYK,TGFBR2,VAV3,VEGFA
#
# Ontology	TermsTested	MinAnnotCount		MaxAnnotCount
#
# Pathway Commons	1607	1		Inf

## Sheet: Mouse Phenotype
# GREAT version 2.0.2	Species assembly: hg19	Association rule: Basal+extension: 5000 bp upstream, 1000 bp downstream, 1000000 bp max extension, curated regulatory domains included
# Ontology summary statistics are provided in the footer.
#
# Ontology	ID	Desc	BinomRank	BinomP	BinomBonfP	HyperP	HyperBonfP	ObsGenes	Regions	Genes
Mouse Phenotype	MP:0010172	abnormal mammary gland epithelium physiology	19	1.20331e-22	8.77576e-19	0.00202497	1	5	chr11:101163125-101164195,chr11:101169678-101170762,chr11:101170808-101171125,chr11:101171228-101172045,chr11:101177343-101177896,chr11:101196526-101197840,chr11:101198824-101199132,chr11:101202024-101202602,chr11:101205165-101206155,chr11:101206446-101208195,chr11:101222422-101223169,chr11:101225105-101226192,chr11:101228308-101229366,chr11:101306910-101308243,chr11:101311997-101313401,chr19:491…	CTNNA1,DDR1,KDM4B,NCOA3,PGR
Mouse Phenotype	MP:0000628	abnormal mammary gland development	44	1.86189e-19	1.35787e-15	1.08811e-06	0.00793556	52	chr10:122705517-122705929,chr10:122814479-122814848,chr10:123273904-123274446,chr10:32649068-32649581,chr10:8126512-8127523,chr10:8170051-8171135,chr10:82707027-82707485,chr10:82723794-82724434,chr10:82725599-82726952,chr10:82727054-82727714,chr10:82767403-82768126,chr10:82800533-82801261,chr10:83665406-83666049,chr10:8449335-8450208,chr10:8585746-8586933,chr10:8636602-8637293,chr10:8786585-87868…	AHR,AR,AREG,ARHGAP5,B4GALT1,BCL2L11,CCND1,CD44,CDH1,CEBPB,CITED1,CSF1,DDR1,ELF5,ESR1,FGF10,FGFR2,FKBP4,FOXA1,GATA3,GJA1,GLI2,GLI3,HPRT1,ID2,IGF1,IL6,IL6ST,ITGB1,JAK2,KDM4B,LEF1,LIF,MKL1,MSX1,MSX2,MYBL1,NCOA3,NOS2,NR3C1,NRG1,NRG3,NTN1,PGR,PHB,PLGLB1,PRLR,TGFA,TP63,UBE3A,XDH,ZFPM2
Mouse Phenotype	MP:0002098	abnormal vibrissa morphology	46	3.8547e-19	2.81123e-15	1.36326e-06	0.00994224	34	chr10:114564102-114564492,chr10:122705517-122705929,chr10:122814479-122814848,chr10:123273904-123274446,chr10:8126512-8127523,chr10:8170051-8171135,chr10:8449335-8450208,chr10:8585746-8586933,chr10:8636602-8637293,chr10:8786585-8786871,chr10:8794045-8795057,chr10:8952087-8953900,chr10:8993132-8994176,chr10:9076049-9076859,chr10:9078509-9079239,chr10:9079586-9080897,chr10:9093293-9094027,chr11:129…	ACD,AREG,ATP7B,BARX2,BMP7,CTNNA1,DICER1,DLX6,EGFR,FGFR2,FOXC1,GATA3,GLI3,HOXC13,INHBA,INHBB,KITLG,KRT17,LAMP2,LBR,LEF1,MECP2,MOCS1,MSX2,POU3F4,RIPK4,SGK3,SPINK5,ST14,TCF7L2,TGFA,TP63,TRPS1,VDR
Mouse Phenotype	MP:0002842	increased systemic arterial blood pressure	50	1.60775e-18	1.17253e-14	0.000286217	1	40	chr10:53340884-53341344,chr10:79064883-79065976,chr10:79130487-79131169,chr10:79131390-79133033,chr10:79169661-79170438,chr10:79173371-79174180,chr10:79174858-79175533,chr10:79176035-79177695,chr10:79190715-79191616,chr10:79221251-79221788,chr10:79239860-79239966,chr10:79257973-79258436,chr10:79258568-79259059,chr10:79266897-79267601,chr10:79400790-79401302,chr10:79616685-79617477,chr10:79619156-…	ADM,ADORA2A,AGT,CD44,CD47,CHGA,CORIN,CTH,CYP4A11,DDAH1,DLL1,DRD5,EDN1,EGFR,GDNF,GPER,HPRT1,HSD11B2,IER3,IGF1,IRS1,IRS2,KCNJ11,KCNK9,KCNMA1,NEDD4L,NOS2,NR3C1,PODXL,PPM1L,PRKG1,PTGIS,SCNN1B,SPECC1L,THBS1,TRPC6,VAV2,VAV3,VDR,WNK1
Mouse Phenotype	MP:0006382	abnormal lung epithelium morphology	68	6.94521e-17	5.06514e-13	1.31106e-05	0.0956156	44	chr10:100253938-100254453,chr10:81486403-81486896,chr11:62267578-62268223,chr11:62275575-62276629,chr11:75053830-75054464,chr11:75054481-75054963,chr11:75077810-75078432,chr11:87634842-87635613,chr12:102896753-102897272,chr13:73712354-73712733,chr13:76410617-76411115,chr14:61905211-61906212,chr14:61980650-61981219,chr14:61991872-61992406,chr14:95678815-95679350,chr14:95707406-95708397,chr14:95731…	ABCA12,ARRB1,BID,BMPER,CEBPA,CELSR1,CITED2,CTGF,DICER1,EGFR,EPAS1,ERRFI1,EYA1,FOXA2,GLI2,GREM1,HES1,HIF1A,HPS1,IGF1,ITCH,KEAP1,KLF5,LIF,LMO7,MAPK14,NDST1,NEUROD1,NFIB,NR3C1,PGGT1B,RAB38,RUNX3,S1PR3,SCGB1A1,SFTPD,SOX2,TCF21,TGFBR1,THBS1,TMEM38B,TRPS1,VEGFA,WNT7B
Mouse Phenotype	MP:0008372	small malleus	97	3.67122e-15	2.67742e-11	0.00161876	1	6	chr22:19836326-19836748,chr4:4627110-4627716,chr4:4645433-4646022,chr5:173909428-173910039,chr5:173910295-173910930,chr5:174136253-174136725,chr5:174204058-174204543,chr5:174345181-174345644,chr7:26968331-26968734,chr8:128811977-128812523,chr8:128812852-128813540,chr8:128813651-128814151,chr8:128821750-128823058,chr8:128823380-128823894,chr8:128861451-128861943,chr8:128864285-128865396,chr8:12886…	GDF6,HOXA1,MSX1,MSX2,MYC,TBX1
Mouse Phenotype	MP:0010900	abnormal pulmonary interalveolar septum morphology	105	6.37524e-15	4.64946e-11	0.00266692	1	21	chr10:49495715-49496499,chr10:81486403-81486896,chr12:102896753-102897272,chr13:33558974-33559422,chr13:33664672-33665726,chr13:33689686-33690198,chr13:33690436-33690997,chr13:33692547-33693227,chr13:33693769-33694730,chr13:33786984-33788063,chr13:33791979-33792615,chr14:61905211-61906212,chr14:61980650-61981219,chr14:61991872-61992406,chr1:117811332-117812093,chr1:118105279-118105617,chr1:803103…	ABCA12,B4GALT1,CAV2,DUSP1,EGFR,EPAS1,ERRFI1,HCK,HIF1A,IGF1,KL,LIF,MAN1A2,MAPK8,NDST1,NR3C1,PKDCC,SFTPD,TMEM38B,TRPS1,VEGFA
Mouse Phenotype	MP:0001284	absent vibrissae	120	4.49983e-14	3.28173e-10	0.00239242	1	12	chr10:114564102-114564492,chr11:130040058-130040623,chr12:54197870-54198901,chr12:54218831-54219780,chr12:54230451-54230657,chr12:54238603-54239346,chr17:39811713-39812341,chr21:42955018-42955610,chr21:43073901-43074635,chr21:43076970-43077677,chr21:43098467-43099076,chr21:43101264-43101903,chr21:43203546-43204039,chr2:121155452-121156101,chr2:121156619-121157279,chr2:121178974-121179326,chr2:121…	CTNNA1,HOXC13,INHBA,INHBB,KRT17,LAMP2,LEF1,RIPK4,ST14,TCF7L2,TP63,TRPS1
Mouse Phenotype	MP:0001179	thick pulmonary interalveolar septum	123	4.90025e-14	3.57376e-10	0.000692399	1	20	chr10:49495715-49496499,chr10:81486403-81486896,chr12:102896753-102897272,chr14:61905211-61906212,chr14:61980650-61981219,chr14:61991872-61992406,chr1:117811332-117812093,chr1:118105279-118105617,chr1:8031030-8031495,chr1:8086339-8086656,chr1:8180489-8181598,chr1:8229723-8230522,chr1:8242214-8242897,chr1:8262654-8263029,chr20:30628436-30629057,chr20:30629506-30630264,chr22:30608423-30609184,chr2:…	ABCA12,B4GALT1,CAV2,DUSP1,EGFR,EPAS1,ERRFI1,HCK,HIF1A,IGF1,LIF,MAN1A2,MAPK8,NDST1,NR3C1,PKDCC,SFTPD,TMEM38B,TRPS1,VEGFA
Mouse Phenotype	MP:0001881	abnormal mammary gland physiology	127	6.34906e-14	4.63037e-10	0.00301862	1	30	chr11:101163125-101164195,chr11:101169678-101170762,chr11:101170808-101171125,chr11:101171228-101172045,chr11:101177343-101177896,chr11:101196526-101197840,chr11:101198824-101199132,chr11:101202024-101202602,chr11:101205165-101206155,chr11:101206446-101208195,chr11:101222422-101223169,chr11:101225105-101226192,chr11:101228308-101229366,chr11:101306910-101308243,chr11:101311997-101313401,chr11:345…	AR,AREG,ATP7B,B4GALT1,CCND1,CDH1,CEBPB,CSF1,CTNNA1,DDR1,EGFR,ELF5,ESR1,FOXB1,GJA1,GUSB,HIF1A,ID2,INHBB,JAK2,KDM4B,LIF,MKL1,NCOA3,NOS2,PGR,PLGLB1,PRLR,TGFA,XDH
#
# Ontology	TermsTested	MinAnnotCount		MaxAnnotCount
#
# Mouse Phenotype	7293	1		Inf

## Sheet: Gene2Regions
# GREAT version 2.0.2	Species assembly: hg19	Association rule: Basal+extension: 5000 bp upstream, 1000 bp downstream, 1000000 bp max extension, curated regulatory domains included
Genes	Regions	TotalRegions
MYC	chr8:128811977-128812523 (+63935), chr8:128812852-128813540 (+64881), chr8:128813651-128814151 (+65586), chr8:128821750-128823058 (+74089), chr8:128823380-128823894 (+75322), chr8:128861451-128861943 (+113382), chr8:128864285-128865396 (+116526), chr8:128866145-128866652 (+118084), chr8:128877890-128878677 (+129969), chr8:128878867-128880621 (+131429), chr8:128882118-128883490 (+134489), chr8:128…	26
KCNMA1	chr10:79679429-79679984 (-282130), chr10:79648973-79649683 (-251751), chr10:79647284-79648094 (-250112), chr10:79632969-79633539 (-235677), chr10:79631784-79632583 (-234607), chr10:79629490-79630334 (-232335), chr10:79625140-79626123 (-228055), chr10:79619156-79619754 (-221878), chr10:79616685-79617477 (-219504), chr10:79400790-79401302 (-3469), chr10:79266897-79267601 (+130328), chr10:79258568-7…	23
TRPS1	chr8:117129311-117129875 (-448365), chr8:117126486-117126830 (-445430), chr8:117124746-117126012 (-444151), chr8:117010401-117011309 (-329627), chr8:117003782-117004476 (-322901), chr8:116990415-116990946 (-309453), chr8:116973976-116974585 (-293053), chr8:116946948-116947653 (-266073), chr8:116942124-116942835 (-261252), chr8:116912270-116913216 (-231515), chr8:116885038-116885650 (-204116), chr…	22
TYRP1	chr9:12718329-12719138 (+25348), chr9:12784415-12784866 (+91255), chr9:12784975-12785803 (+92003), chr9:12793492-12793693 (+100207), chr9:12793893-12795073 (+101097), chr9:12903061-12903788 (+210039), chr9:12903983-12904289 (+210750), chr9:13023373-13024393 (+330497), chr9:13033907-13034526 (+340831), chr9:13045906-13046463 (+352799), chr9:13060498-13061062 (+367394), chr9:13063898-13065089 (+371…	18
EIF3H	chr8:117129311-117129875 (+638469), chr8:117126486-117126830 (+641404), chr8:117124746-117126012 (+642683), chr8:117010401-117011309 (+757207), chr8:117003782-117004476 (+763933), chr8:116990415-116990946 (+777381), chr8:116973976-116974585 (+793781), chr8:116946948-116947653 (+820761), chr8:116942124-116942835 (+825582), chr8:116912270-116913216 (+855319), chr8:116885038-116885650 (+882718), chr…	18
MED13L	chr12:116976866-116977669 (-262277), chr12:116932871-116933973 (-218431), chr12:116931727-116932728 (-217237), chr12:116864799-116865895 (-150356), chr12:116864010-116864704 (-149366), chr12:116827647-116829291 (-113478), chr12:116823497-116824054 (-108785), chr12:116782146-116782656 (-67410), chr12:116758609-116759153 (-43890), chr12:116736541-116738058 (-22309), chr12:116723479-116723961 (-8729…	18
MPDZ	chr9:13181486-13182089 (+68583), chr9:13084036-13084975 (+165865), chr9:13083544-13084034 (+166582), chr9:13076158-13077309 (+173637), chr9:13073258-13073788 (+176848), chr9:13070431-13071233 (+179539), chr9:13063898-13065089 (+185877), chr9:13060498-13061062 (+189591), chr9:13045906-13046463 (+204186), chr9:13033907-13034526 (+216154), chr9:13023373-13024393 (+226488), chr9:12903983-12904289 (+3…	18
DSCAM	chr21:42514854-42515049 (-295913), chr21:42512678-42513414 (-294007), chr21:42395782-42396627 (-177166), chr21:42014972-42015389 (+203858), chr21:41760022-41760154 (+458951), chr21:41758763-41759671 (+459822), chr21:41757759-41758752 (+460783), chr21:41753302-41753840 (+465468), chr21:41752645-41752787 (+466323), chr21:41722835-41723455 (+495894), chr21:41710972-41711517 (+507794), chr21:41703572…	17
KIAA0182	chr16:85328648-85329240 (-317980), chr16:85339347-85340339 (-307081), chr16:85355251-85356374 (-291111), chr16:85383762-85384245 (-262920), chr16:85384493-85385464 (-261945), chr16:85418046-85419144 (-228329), chr16:85497970-85500447 (-147715), chr16:85504204-85505013 (-142315), chr16:85505281-85506732 (-140917), chr16:85507751-85509508 (-138294), chr16:85524694-85526784 (-121185), chr16:85592861…	16
PGR	chr11:101311997-101313401 (-312155), chr11:101306910-101308243 (-307033), chr11:101228308-101229366 (-228293), chr11:101225105-101226192 (-225105), chr11:101222422-101223169 (-222252), chr11:101206446-101208195 (-206777), chr11:101205165-101206155 (-205116), chr11:101202024-101202602 (-201769), chr11:101198824-101199132 (-198434), chr11:101196526-101197840 (-196639), chr11:101177343-101177896 (-1…	15
TRPC6	chr11:101311997-101313401 (+141960), chr11:101306910-101308243 (+147082), chr11:101228308-101229366 (+225822), chr11:101225105-101226192 (+229010), chr11:101222422-101223169 (+231863), chr11:101206446-101208195 (+247338), chr11:101205165-101206155 (+248999), chr11:101202024-101202602 (+252346), chr11:101198824-101199132 (+255681), chr11:101196526-101197840 (+257476), chr11:101177343-101177896 (+2…	15
EHF	chr11:34581966-34582578 (-71739), chr11:34592014-34592794 (-61607), chr11:34654788-34654863 (+815), chr11:34654875-34656301 (+1577), chr11:34661344-34662438 (+7880), chr11:34675158-34676172 (+21654), chr11:34676253-34677205 (+22718), chr11:34686451-34687580 (+33005), chr11:34688774-34689354 (+35053), chr11:34689486-34690367 (+35916), chr11:34771413-34772210 (+117801), chr11:34778549-34779117 (+12…	15
BCOR	chrX:40378166-40378792 (-421760), chrX:40376998-40377876 (-420718), chrX:40334085-40334486 (-377567), chrX:40328579-40329068 (-372105), chrX:40274894-40275625 (-318541), chrX:40274424-40274753 (-317870), chrX:40273385-40274238 (-317093), chrX:40033262-40033750 (-76787), chrX:39753846-39755532 (+202030), chrX:39751152-39751577 (+205354), chrX:39478556-39479647 (+477617)	14
BHLHE40	chr3:4722764-4723419 (-298005), chr3:4728622-4731140 (-291216), chr3:4755347-4756650 (-265098), chr3:4757557-4757737 (-263450), chr3:4762350-4763364 (-258240), chr3:4798070-4798575 (-222774), chr3:4811498-4812087 (-209304), chr3:4818199-4819245 (-202375), chr3:4824272-4824887 (-196517), chr3:4828156-4828885 (-192576), chr3:4863084-4863632 (-157739), chr3:4889662-4890389 (-131071), chr3:4920818-49…	14
GREB1	chr2:11620477-11621337 (-53335), chr2:11638168-11638334 (-35991), chr2:11638361-11639255 (-35434), chr2:11641161-11641765 (-32779), chr2:11646054-11646532 (-27949), chr2:11648418-11649013 (-25526), chr2:11664403-11665138 (-9471), chr2:11670872-11671587 (-3012), chr2:11673843-11674337 (-152), chr2:11675843-11676195 (+1777), chr2:11679414-11680424 (+5677), chr2:11680558-11681089 (+6582), chr2:11682…	14
GRHL2	chr8:102358312-102358941 (-146041), chr8:102372972-102373663 (-131350), chr8:102448948-102449899 (-55244), chr8:102450428-102451257 (-53825), chr8:102457874-102458844 (-46309), chr8:102472822-102473321 (-31596), chr8:102478759-102480367 (-25105), chr8:102486203-102487331 (-17901), chr8:102507337-102508114 (+3058), chr8:102516196-102517342 (+12101), chr8:102517681-102518586 (+13466), chr8:10253272…	14
TNP1	chr2:218521072-218521561 (-796535), chr2:218230502-218232632 (-506785), chr2:218222842-218223361 (-498320), chr2:218197459-218198146 (-473021), chr2:218195990-218197207 (-471817), chr2:218190695-218191773 (-466452), chr2:218178357-218179633 (-454213), chr2:218112962-218113145 (-388272), chr2:218111990-218112723 (-387575), chr2:217957154-217957854 (-232722), chr2:217920249-217921205 (-195945), chr…	14
TNS1	chr2:218816187-218816430 (-7513), chr2:218521072-218521561 (+287479), chr2:218230502-218232632 (+577229), chr2:218222842-218223361 (+585694), chr2:218197459-218198146 (+610993), chr2:218195990-218197207 (+612197), chr2:218190695-218191773 (+617562), chr2:218178357-218179633 (+629801), chr2:218112962-218113145 (+695742), chr2:218111990-218112723 (+696439), chr2:217957154-217957854 (+851292), chr2:…	14
TPRG1	chr3:187975139-187975733 (-914327), chr3:188000479-188001601 (-888723), chr3:188657758-188658299 (-231734), chr3:188665241-188666115 (-224085), chr3:188820679-188821571 (-68638), chr3:188821954-188822649 (-67461), chr3:189021133-189021870 (+131739), chr3:189021968-189023082 (+132762), chr3:189029103-189029804 (+139691), chr3:189034054-189034919 (+144724), chr3:189040063-189040767 (+150652), chr3:…	14
MAP1LC3B2	chr12:116723479-116723961 (-273466), chr12:116736541-116738058 (-259886), chr12:116758609-116759153 (-238305), chr12:116782146-116782656 (-214785), chr12:116823497-116824054 (-173410), chr12:116827647-116829291 (-168717), chr12:116864010-116864704 (-132829), chr12:116864799-116865895 (-131839), chr12:116931727-116932728 (-64958), chr12:116932871-116933973 (-63764), chr12:116976866-116977669 (-199…	14
THBS1	chr15:39165370-39165851 (-707669), chr15:39166545-39166608 (-706703), chr15:39169366-39170302 (-703446), chr15:39170931-39171514 (-702057), chr15:39187196-39188109 (-685627), chr15:39480997-39481449 (-392057), chr15:39565857-39566791 (-306956), chr15:39914912-39915586 (+41969), chr15:39922120-39922576 (+49068), chr15:39960278-39961555 (+87637), chr15:40011300-40012486 (+138613), chr15:40013028-40…	14
PCP4	chr21:41356631-41357649 (+117793), chr21:41681775-41682752 (+442917), chr21:41690226-41691056 (+451294), chr21:41694590-41695054 (+455475), chr21:41703019-41703539 (+463932), chr21:41703572-41704036 (+464457), chr21:41710972-41711517 (+471898), chr21:41722835-41723455 (+483798), chr21:41752645-41752787 (+513369), chr21:41753302-41753840 (+514224), chr21:41757759-41758752 (+518909), chr21:41758763…	14
KIAA0513	chr16:85328648-85329240 (+267534), chr16:85339347-85340339 (+278433), chr16:85355251-85356374 (+294403), chr16:85383762-85384245 (+322594), chr16:85384493-85385464 (+323569), chr16:85418046-85419144 (+357185), chr16:85497970-85500447 (+437799), chr16:85504204-85505013 (+443199), chr16:85505281-85506732 (+444597), chr16:85507751-85509508 (+447220), chr16:85524694-85526784 (+464329), chr16:85592861…	14
ITPR1	chr3:4722764-4723419 (+188060), chr3:4728622-4731140 (+194849), chr3:4755347-4756650 (+220967), chr3:4757557-4757737 (+222615), chr3:4762350-4763364 (+227825), chr3:4798070-4798575 (+263291), chr3:4811498-4812087 (+276761), chr3:4818199-4819245 (+283690), chr3:4824272-4824887 (+289548), chr3:4828156-4828885 (+293489), chr3:4863084-4863632 (+328326), chr3:4889662-4890389 (+354994), chr3:4920818-49…	13
LPP	chr3:187498663-187499281 (-431749), chr3:187526205-187528490 (-403373), chr3:187634721-187635549 (-295586), chr3:187646262-187647217 (-283981), chr3:187749033-187749479 (-181465), chr3:187753940-187755254 (-176124), chr3:187778809-187779319 (-151657), chr3:187975139-187975733 (+44715), chr3:188000479-188001601 (+70319), chr3:188657758-188658299 (+727308), chr3:188665241-188666115 (+734957), chr3:…	13
GATA3	chr10:8126512-8127523 (+30351), chr10:8170051-8171135 (+73926), chr10:8449335-8450208 (+353105), chr10:8585746-8586933 (+489673), chr10:8636602-8637293 (+540281), chr10:8786585-8786871 (+690061), chr10:8794045-8795057 (+697884), chr10:8952087-8953900 (+856327), chr10:8993132-8994176 (+896987), chr10:9076049-9076859 (+979787), chr10:9078509-9079239 (+982207), chr10:9079586-9080897 (+983575), chr10…	13
BOD1	chr5:173249425-173249927 (-206010), chr5:173193285-173193936 (-149945), chr5:173017584-173018909 (+25419), chr5:172994372-172995129 (+48915), chr5:172990046-172990727 (+53279), chr5:172961881-172963576 (+80937), chr5:172959917-172960846 (+83284), chr5:172926244-172927041 (+117023), chr5:172913197-172913681 (+130227), chr5:172899043-172900686 (+143801), chr5:172881274-172882613 (+161722), chr5:172…	12
MAP3K1	chr5:55325134-55326428 (-785119), chr5:55346600-55347221 (-763989), chr5:55653282-55653779 (-457369), chr5:55683958-55685088 (-426377), chr5:55717379-55718547 (-392937), chr5:55724342-55725513 (-385972), chr5:55749279-55750524 (-360998), chr5:55750665-55751198 (-359968), chr5:55755763-55757118 (-354459), chr5:55936765-55937466 (-173784), chr5:55964623-55965648 (-145764), chr5:56052770-56053328 (-…	12
IL6ST	chr5:56052770-56053328 (-762228), chr5:55964623-55965648 (-674315), chr5:55936765-55937466 (-646295), chr5:55755763-55757118 (-465620), chr5:55750665-55751198 (-460111), chr5:55749279-55750524 (-459081), chr5:55724342-55725513 (-434107), chr5:55717379-55718547 (-427142), chr5:55683958-55685088 (-393702), chr5:55653282-55653779 (-362710), chr5:55346600-55347221 (-56090), chr5:55325134-55326428 (-3…	12
IRF2BP2	chr1:235123064-235123746 (-378134), chr1:235053832-235054352 (-308821), chr1:235010910-235012856 (-266612), chr1:235009896-235010836 (-265095), chr1:234859226-234861239 (-114962), chr1:234853365-234853870 (-108347), chr1:234793747-234794454 (-48830), chr1:234748215-234748911 (-3292), chr1:234740552-234741164 (+4413), chr1:234739509-234740037 (+5498), chr1:234737019-234737770 (+7876), chr1:2347000…	12
C9orf3	chr9:97460162-97460683 (-61508), chr9:97544988-97545973 (+23550), chr9:97580891-97581008 (+59019), chr9:97581292-97582167 (+59799), chr9:97684138-97684217 (+162247), chr9:97684461-97685801 (+163200), chr9:97685969-97686503 (+164305), chr9:97688132-97688784 (+166527), chr9:97734632-97735036 (+212903), chr9:97751887-97752711 (+230368), chr9:97753982-97754763 (+232442), chr9:97755079-97756354 (+2337…	12
CLCN4	chrX:9998533-9999042 (-126197), chrX:10004327-10004778 (-120432), chrX:10015634-10016004 (-109166), chrX:10019736-10020486 (-104874), chrX:10022411-10022748 (-102405), chrX:10050918-10052174 (-73439), chrX:10069070-10069770 (-55565), chrX:10124969-10125321 (+160), chrX:10724339-10725049 (+599709)	12
PDHX	chr11:34654875-34656301 (-282089), chr11:34661344-34662438 (-275786), chr11:34675158-34676172 (-262012), chr11:34676253-34677205 (-260948), chr11:34686451-34687580 (-250661), chr11:34688774-34689354 (-248613), chr11:34689486-34690367 (-247750), chr11:34771413-34772210 (-165865), chr11:34778549-34779117 (-158844), chr11:34844614-34845169 (-92785), chr11:34847528-34848578 (-89624), chr11:34908662-3…	12
UST	chr6:148561022-148561413 (-507053), chr6:148578876-148579397 (-489134), chr6:148579743-148580640 (-488079), chr6:148666364-148666848 (-401665), chr6:149351945-149353577 (+284490), chr6:149353987-149354016 (+285731), chr6:149381670-149382011 (+313570), chr6:149382027-149382918 (+314202), chr6:149397265-149397992 (+329358), chr6:149398069-149398813 (+330170), chr6:149400693-149401923 (+333037), chr…	12
TBL1XR1	chr3:177888358-177888916 (-973589), chr3:177527754-177528585 (-613122), chr3:177353202-177354158 (-438632), chr3:177336399-177337716 (-422010), chr3:177320196-177321118 (-405609), chr3:177195985-177197186 (-281538), chr3:177137925-177139301 (-223565), chr3:176670972-176672411 (+243356), chr3:176644950-176646850 (+269148), chr3:176638525-176639273 (+276149), chr3:176585487-176586619 (+328995), chr…	12
TM2D1	chr1:62107959-62109033 (+82599), chr1:61804361-61805056 (+386386), chr1:61803614-61804216 (+387180), chr1:61788422-61788860 (+402454), chr1:61787540-61788179 (+403235), chr1:61759930-61760054 (+431103), chr1:61759622-61759835 (+431366), chr1:61649116-61649908 (+541583), chr1:61609346-61609605 (+581619), chr1:61608651-61609149 (+582195), chr1:61607085-61607766 (+583669)	11
SULF1	chr8:69498370-69499250 (-880049), chr8:69534198-69535649 (-843935), chr8:69610998-69612445 (-767137), chr8:69643923-69644536 (-734629), chr8:69665760-69667065 (-712446), chr8:69669832-69670982 (-708452), chr8:69765455-69767285 (-612489), chr8:69945928-69946408 (-432691), chr8:69992059-69992539 (-386560), chr8:70030320-70031221 (-348088), chr8:70070761-70071319 (-307819)	11
FANCC	chr9:97755079-97756354 (+324274), chr9:97753982-97754763 (+325618), chr9:97751887-97752711 (+327692), chr9:97734632-97735036 (+345157), chr9:97688132-97688784 (+391533), chr9:97685969-97686503 (+393755), chr9:97684461-97685801 (+394860), chr9:97684138-97684217 (+395813), chr9:97581292-97582167 (+498261), chr9:97580891-97581008 (+499041), chr9:97544988-97545973 (+534510)	11
C8orf34	chr8:69498370-69499250 (+255853), chr8:69534198-69535649 (+291967), chr8:69610998-69612445 (+368765), chr8:69643923-69644536 (+401273), chr8:69665760-69667065 (+423456), chr8:69669832-69670982 (+427450), chr8:69765455-69767285 (+523413), chr8:69945928-69946408 (+703211), chr8:69992059-69992539 (+749342), chr8:70030320-70031221 (+787814), chr8:70070761-70071319 (+828083)	11
STARD13	chr13:34216547-34217714 (-357230), chr13:34083852-34084443 (-224247), chr13:34026980-34027863 (-167521), chr13:34020945-34021884 (-161514), chr13:33791979-33792615 (+67604), chr13:33786984-33788063 (+72377), chr13:33693769-33694730 (+165651), chr13:33692547-33693227 (+167014), chr13:33690436-33690997 (+169184), chr13:33689686-33690198 (+169959), chr13:33664672-33665726 (+194702)	11
IGF1R	chr15:98998961-98999775 (-193393), chr15:99294960-99295556 (+102497), chr15:99301503-99301792 (+108887), chr15:99332008-99332567 (+139527), chr15:99397120-99398240 (+204919), chr15:99398403-99399079 (+205980), chr15:99400818-99401475 (+208386), chr15:99403426-99404026 (+210965), chr15:99410609-99411166 (+218127), chr15:99411565-99412091 (+219067), chr15:99415872-99416639 (+223495)	11
NFIA	chr1:61607085-61607766 (+59892), chr1:61608651-61609149 (+61366), chr1:61609346-61609605 (+61942), chr1:61649116-61649908 (+101978), chr1:61759622-61759835 (+212195), chr1:61759930-61760054 (+212458), chr1:61787540-61788179 (+240326), chr1:61788422-61788860 (+241107), chr1:61803614-61804216 (+256381), chr1:61804361-61805056 (+257175), chr1:62107959-62109033 (+560962)	11
NPSR1	chr7:34065084-34065766 (-632472), chr7:34070323-34071477 (-626997), chr7:34074266-34075027 (-623250), chr7:34075764-34077403 (-621313), chr7:34082889-34084038 (-614433), chr7:34096387-34098242 (-600582), chr7:34103936-34105383 (-593237), chr7:34114648-34115233 (-582956), chr7:34197722-34198761 (-499655), chr7:34275522-34276219 (-422026), chr7:35064687-35065668 (+367281)	11
EDN1	chr6:12275263-12275946 (-14924), chr6:12283977-12284517 (-6282), chr6:12288691-12289057 (-1655), chr6:12289086-12289709 (-1131), chr6:12312912-12315450 (+23652), chr6:12324333-12325049 (+34162), chr6:12331384-12332836 (+41581), chr6:12343513-12344609 (+53532), chr6:12411030-12411805 (+120889), chr6:12415786-12417977 (+126353), chr6:12484569-12486038 (+194775)	11
PRKCQ	chr10:7275181-7276168 (-653421), chr10:6443343-6444064 (+178550), chr10:6442036-6442654 (+179909), chr10:6440881-6441874 (+180876), chr10:6438093-6439407 (+183504), chr10:6435932-6437170 (+185703), chr10:6406707-6408059 (+214871), chr10:6404415-6406057 (+217018), chr10:6403738-6404297 (+218236), chr10:6338420-6340599 (+282744), chr10:6329303-6329714 (+292745)	11
BMPER	chr7:33542967-33543493 (-401293), chr7:34065084-34065766 (+120902), chr7:34070323-34071477 (+126377), chr7:34074266-34075027 (+130124), chr7:34075764-34077403 (+132061), chr7:34082889-34084038 (+138941), chr7:34096387-34098242 (+152792), chr7:34103936-34105383 (+160137), chr7:34114648-34115233 (+170418), chr7:34197722-34198761 (+253719), chr7:34275522-34276219 (+331348)	11
TP63	chr3:189021133-189021870 (-327714), chr3:189021968-189023082 (-326691), chr3:189029103-189029804 (-319762), chr3:189034054-189034919 (-314729), chr3:189040063-189040767 (-308801), chr3:189042197-189042982 (-306626), chr3:189101292-189101909 (-247615), chr3:189176112-189176759 (-172780), chr3:189474320-189474884 (+125386), chr3:189551766-189552225 (+202780), chr3:189662598-189663122 (+313644)	11
AUTS2	chr7:68195685-68196542 (-867791), chr7:68877460-68878014 (-186168), chr7:69110095-69111113 (+46699), chr7:69111138-69112153 (+47741), chr7:69112663-69113197 (+49025), chr7:69119237-69119900 (+55664), chr7:69136024-69136607 (+72411), chr7:69152846-69153341 (+89189), chr7:69236995-69238481 (+173833), chr7:69763719-69764762 (+700336), chr7:70044162-70044779 (+980566)	11
ATP6AP2	chrX:40033262-40033750 (-406710), chrX:40273385-40274238 (-166404), chrX:40274424-40274753 (-165627), chrX:40274894-40275625 (-164956), chrX:40328579-40329068 (-111392), chrX:40334085-40334486 (-105930), chrX:40376998-40377876 (-62779), chrX:40378166-40378792 (-61737)	10
TNS3	chr7:47640329-47640953 (-18899), chr7:47618142-47618722 (+3310), chr7:47615375-47616524 (+5792), chr7:47581490-47582046 (+39974), chr7:47578387-47578925 (+43086), chr7:47514693-47515794 (+106498), chr7:47493078-47493635 (+128385), chr7:46971984-46972430 (+649535), chr7:46926056-46926631 (+695398), chr7:46924580-46925261 (+696821)	10
SLC24A3	chr20:19110748-19111172 (-82330), chr20:19263909-19264817 (+71073), chr20:19377111-19378212 (+184372), chr20:19386584-19387535 (+193770), chr20:19690519-19691361 (+497650), chr20:19693253-19693906 (+500290), chr20:19739326-19739483 (+546115), chr20:19747614-19748343 (+554689), chr20:19756101-19756955 (+563238), chr20:19764466-19765656 (+571771)	10
BTG1	chr12:92539773-92540303 (-365), chr12:92473802-92474801 (+65371), chr12:92436783-92437350 (+102606), chr12:92211272-92211828 (+328123), chr12:92007160-92007643 (+532271), chr12:91880374-91880817 (+659077), chr12:91817094-91817344 (+722454), chr12:91815975-91816518 (+723426), chr12:91782058-91783000 (+757144), chr12:91781111-91781954 (+758140)	10
PRKCE	chr2:45916001-45916437 (+37176), chr2:45979421-45980486 (+100911), chr2:46042505-46042969 (+163694), chr2:46047653-46048341 (+168954), chr2:46049009-46049428 (+170176), chr2:46136646-46137125 (+257843), chr2:46165655-46166418 (+286994), chr2:46252805-46253175 (+373947), chr2:46269003-46269194 (+390056), chr2:46269221-46269952 (+390544)	10
PRLR	chr5:35476585-35477999 (-246469), chr5:35468783-35469342 (-238240), chr5:35442983-35443595 (-212466), chr5:35350899-35351605 (-120429), chr5:35304757-35306153 (-74632), chr5:35213650-35214813 (+16591), chr5:35210137-35210755 (+20377), chr5:35205251-35206241 (+25077), chr5:35201935-35202745 (+28483), chr5:35201120-35201919 (+29303)	10
DUSP4	chr8:29666931-29667720 (-459059), chr8:29609666-29610394 (-401763), chr8:29595863-29596394 (-387862), chr8:29512837-29513848 (-305076), chr8:29451504-29451919 (-243445), chr8:29399731-29400219 (-191708), chr8:29361138-29361541 (-153073), chr8:29146510-29147115 (+61454), chr8:29144094-29145065 (+63687), chr8:29140382-29140924 (+67614)	10
HES1	chr3:193531066-193531817 (-322489), chr3:193588016-193589124 (-265361), chr3:193639955-193640839 (-213534), chr3:193873815-193874374 (+20164), chr3:193876020-193877466 (+22812), chr3:193878667-193879422 (+25114), chr3:193902031-193902783 (+48476), chr3:193929366-193931371 (+76438), chr3:193988100-193988835 (+134537), chr3:194041361-194042022 (+187761)	10
MRPS23	chr17:56062789-56063512 (-135718), chr17:56048874-56049477 (-121743), chr17:56025262-56026847 (-98622), chr17:56023669-56024854 (-96829), chr17:56020850-56021532 (-93758), chr17:56017731-56018390 (-90628), chr17:55979495-55979947 (-52288), chr17:55978353-55979439 (-51463), chr17:55969773-55971136 (-43022), chr17:55418011-55418434 (+509210)	10
STC2	chr5:173017584-173018909 (-261741), chr5:172994372-172995129 (-238245), chr5:172990046-172990727 (-233881), chr5:172961881-172963576 (-206223), chr5:172959917-172960846 (-203876), chr5:172926244-172927041 (-170137), chr5:172913197-172913681 (-156933), chr5:172899043-172900686 (-143359), chr5:172881274-172882613 (-125438), chr5:172879860-172879901 (-123375)	10
CBX4	chr17:78004460-78005034 (-191534), chr17:77967154-77967671 (-154200), chr17:77953222-77953713 (-140255), chr17:77892761-77893295 (-79815), chr17:77889727-77890618 (-76960), chr17:77878067-77878658 (-65150), chr17:77877182-77877791 (-64274), chr17:77871297-77871860 (-58366), chr17:77866742-77867465 (-53891), chr17:77803270-77803603 (+9776)	10
SLC45A1	chr1:8180489-8181598 (-203346), chr1:8229723-8230522 (-154267), chr1:8242214-8242897 (-141834), chr1:8262654-8263029 (-121548), chr1:8403461-8404176 (+19429), chr1:8451052-8451588 (+66930), chr1:8472462-8472973 (+88328), chr1:8730227-8730579 (+346013), chr1:8802045-8802598 (+417932), chr1:8849414-8850053 (+465344)	10
EPAS1	chr2:45916001-45916437 (-608322), chr2:45979421-45980486 (-544587), chr2:46042505-46042969 (-481804), chr2:46047653-46048341 (-476544), chr2:46049009-46049428 (-475322), chr2:46136646-46137125 (-387655), chr2:46165655-46166418 (-358504), chr2:46252805-46253175 (-271551), chr2:46269003-46269194 (-255442), chr2:46269221-46269952 (-254954)	10
KLF6	chr10:4705092-4705797 (-877972), chr10:4703908-4704519 (-876741), chr10:4680147-4680801 (-853001), chr10:4321485-4323877 (-495208), chr10:4225623-4226358 (-398518), chr10:4100797-4101403 (-273627), chr10:3978072-3978713 (-150920), chr10:3894336-3895146 (-67268), chr10:3790110-3790617 (+37109), chr10:3510178-3511691 (+316538)	10
PFKFB3	chr10:6329303-6329714 (+84669), chr10:6338420-6340599 (+94670), chr10:6403738-6404297 (+159178), chr10:6404415-6406057 (+160396), chr10:6406707-6408059 (+162543), chr10:6435932-6437170 (+191711), chr10:6438093-6439407 (+193910), chr10:6440881-6441874 (+196538), chr10:6442036-6442654 (+197505), chr10:6443343-6444064 (+198864)	10
PGPEP1L	chr15:99415872-99416639 (+132629), chr15:99411565-99412091 (+137057), chr15:99410609-99411166 (+137997), chr15:99403426-99404026 (+145159), chr15:99400818-99401475 (+147738), chr15:99398403-99399079 (+150144), chr15:99397120-99398240 (+151205), chr15:99332008-99332567 (+216597), chr15:99301503-99301792 (+247237), chr15:99294960-99295556 (+253627)	10
SHROOM2	chrX:9998533-9999042 (+244292), chrX:10004327-10004778 (+250057), chrX:10015634-10016004 (+261323), chrX:10019736-10020486 (+265615), chrX:10022411-10022748 (+268084), chrX:10050918-10052174 (+297050), chrX:10069070-10069770 (+314924)	9
TPBG	chr6:83074266-83074628 (+486), chr6:83277107-83277954 (+203570), chr6:83278087-83278799 (+204482), chr6:83279093-83279171 (+205171), chr6:83279350-83280656 (+206042), chr6:83333910-83334346 (+260167), chr6:83660805-83661741 (+587312), chr6:83718426-83718911 (+644708), chr6:83761462-83761914 (+687727)	9
METTL21D	chr14:50506737-50507213 (+76322), chr14:50471686-50471706 (+111601), chr14:50467741-50468390 (+115231), chr14:50466710-50467322 (+116281), chr14:50465919-50466564 (+117055), chr14:50460252-50460689 (+122826), chr14:50459388-50460111 (+123547), chr14:50457216-50457729 (+125824), chr14:50437713-50438352 (+145264)	9
MPHOSPH6	chr16:82229404-82230273 (-26010), chr16:82186028-82186754 (+17438), chr16:82184128-82184692 (+19419), chr16:82171852-82173118 (+31344), chr16:82171655-82171808 (+32097), chr16:82170647-82171616 (+32697), chr16:82077418-82078041 (+126099), chr16:82074806-82075244 (+128804), chr16:82074182-82074390 (+129543)	9
DCN	chr12:92473802-92474801 (-900943), chr12:92436783-92437350 (-863708), chr12:92211272-92211828 (-638191), chr12:92007160-92007643 (-434043), chr12:91880374-91880817 (-307237), chr12:91817094-91817344 (-243860), chr12:91815975-91816518 (-242888), chr12:91782058-91783000 (-209170), chr12:91781111-91781954 (-208174)	9
DLG5	chr10:79679429-79679984 (+6641), chr10:79648973-79649683 (+37020), chr10:79647284-79648094 (+38659), chr10:79632969-79633539 (+53094), chr10:79631784-79632583 (+54164), chr10:79629490-79630334 (+56436), chr10:79625140-79626123 (+60716), chr10:79619156-79619754 (+66893), chr10:79616685-79617477 (+69267)	9
CCR7	chr17:38774824-38775833 (-53593), chr17:38773765-38774741 (-52517), chr17:38762590-38763663 (-41391), chr17:38738094-38739311 (-16967), chr17:38711534-38712284 (+9827), chr17:38708631-38709230 (+12805), chr17:38707951-38708503 (+13509), chr17:38707876-38707933 (+13831), chr17:38705216-38706129 (+16063)	9
VEZF1	chr17:56062789-56063512 (+2464), chr17:56048874-56049477 (+16439), chr17:56025262-56026847 (+39560), chr17:56023669-56024854 (+41353), chr17:56020850-56021532 (+44424), chr17:56017731-56018390 (+47554), chr17:55979495-55979947 (+85894), chr17:55978353-55979439 (+86719), chr17:55969773-55971136 (+95160)	9
ZFP36L1	chr14:69095211-69096183 (+167263), chr14:69036456-69037323 (+226070), chr14:69031761-69032299 (+230930), chr14:68925615-68926333 (+336986), chr14:68638703-68640502 (+623357), chr14:68613197-68614382 (+649170), chr14:68610293-68610619 (+652504), chr14:68604391-68604989 (+658270), chr14:68430576-68432091 (+831626)	9
ZNF706	chr8:102486203-102487331 (-268807), chr8:102478759-102480367 (-261603), chr8:102472822-102473321 (-255112), chr8:102457874-102458844 (-240399), chr8:102450428-102451257 (-232883), chr8:102448948-102449899 (-231464), chr8:102372972-102373663 (-155358), chr8:102358312-102358941 (-140667), chr8:102063480-102064537 (+153951)	9
ZNF703	chr8:36930729-36930827 (-622523), chr8:36930862-36931489 (-622125), chr8:36932329-36932877 (-620698), chr8:37001118-37001337 (-552073), chr8:37001975-37003512 (-550557), chr8:37454498-37454899 (-98602), chr8:37455904-37456935 (-96881), chr8:37457269-37457514 (-95909), chr8:37548701-37549468 (-4216)	9
PHACTR1	chr6:12312912-12315450 (-402856), chr6:12324333-12325049 (-392346), chr6:12331384-12332836 (-384927), chr6:12343513-12344609 (-372976), chr6:12411030-12411805 (-305619), chr6:12415786-12417977 (-300155), chr6:12484569-12486038 (-231733), chr6:12844049-12845286 (+127631), chr6:12845294-12845447 (+128334)	9
ARF6	chr14:50437713-50438352 (+78297), chr14:50457216-50457729 (+97737), chr14:50459388-50460111 (+100014), chr14:50460252-50460689 (+100735), chr14:50465919-50466564 (+106506), chr14:50466710-50467322 (+107280), chr14:50467741-50468390 (+108330), chr14:50471686-50471706 (+111960), chr14:50506737-50507213 (+147239)	9
ACTBL2	chr5:57483150-57484552 (-705215), chr5:57479127-57479973 (-700914), chr5:57477624-57478322 (-699337), chr5:57422773-57423225 (-644363), chr5:57391063-57391738 (-612765), chr5:57389701-57390410 (-611420), chr5:57365398-57366240 (-587183), chr5:57158094-57158944 (-379883), chr5:56731366-56732007 (+46949)	9
AGR3	chr7:17315566-17316403 (-394372), chr7:16967584-16968099 (-46229), chr7:16966080-16966947 (-44901), chr7:16944768-16945310 (-23426), chr7:16922512-16922992 (-1139), chr7:16921851-16921923 (-274), chr7:16919990-16920730 (+1253), chr7:16886106-16887639 (+34740), chr7:16849678-16850762 (+71393)	9
IRF2BPL	chr14:77554531-77555173 (-59818), chr14:77500190-77501002 (-5562), chr14:77473761-77474737 (+20785), chr14:77385131-77386156 (+109390), chr14:77384356-77385117 (+110297), chr14:77371031-77371938 (+123549), chr14:77367335-77368177 (+127278), chr14:77367094-77367212 (+127881), chr14:77240966-77241438 (+253832)	9
CHORDC1	chr11:90645337-90646957 (-689615), chr11:90624483-90624929 (-668174), chr11:90623585-90623896 (-667209), chr11:90581730-90583184 (-625925), chr11:90580365-90580700 (-624001), chr11:90579524-90580332 (-623396), chr11:90579514-90579520 (-622985), chr11:90402790-90403268 (-446497), chr11:90402169-90402747 (-445926)	9
IRS2	chr13:110395976-110396497 (+42677), chr13:110296317-110296924 (+142293), chr13:110237225-110237502 (+201550), chr13:110228551-110229309 (+209984), chr13:110161818-110162442 (+276784), chr13:109909337-109909758 (+529366), chr13:109895679-109896250 (+542949), chr13:109739811-109740828 (+698594), chr13:109511459-109512441 (+926964)	9
KDM4B	chr19:4914783-4915555 (-53955), chr19:4939343-4939815 (-29545), chr19:4970609-4971246 (+1804), chr19:4971382-4971702 (+2418), chr19:4972016-4972122 (+2945), chr19:4972479-4973412 (+3822), chr19:4976256-4977382 (+7695), chr19:4991379-4992731 (+22931), chr19:5021075-5021522 (+52175)	9
KCNU1	chr8:35756882-35757316 (-884743), chr8:36930729-36930827 (+288936), chr8:36930862-36931489 (+289334), chr8:36932329-36932877 (+290761), chr8:37001118-37001337 (+359386), chr8:37001975-37003512 (+360902), chr8:37454498-37454899 (+812857), chr8:37455904-37456935 (+814578), chr8:37457269-37457514 (+815550)	9
KCTD1	chr18:24352649-24353125 (-224387), chr18:24345431-24345845 (-217138), chr18:24326472-24327288 (-198380), chr18:24325185-24325825 (-197005), chr18:24324854-24324928 (-196391), chr18:24238639-24238672 (-110156), chr18:24237720-24238332 (-109526), chr18:24155280-24156278 (-27279), chr18:24125271-24125671 (+3029)	9
TSPYL5	chr8:98361074-98361551 (-71137), chr8:98360625-98360650 (-70462), chr8:98278435-98279154 (+11381), chr8:98094364-98094919 (+195534), chr8:98038045-98038705 (+251801), chr8:98037532-98037947 (+252436), chr8:97981499-97981922 (+308465), chr8:97951765-97952389 (+338099), chr8:97940103-97941153 (+349548)	9
TLE3	chr15:70754746-70755943 (-365089), chr15:70667312-70667858 (-277329), chr15:70613457-70614146 (-223546), chr15:70385588-70386506 (+4209), chr15:70384188-70384659 (+5832), chr15:69887612-69888191 (+502354), chr15:69886602-69887390 (+503260), chr15:69774899-69775546 (+615033), chr15:69759916-69760487 (+630054)	9
THSD4	chr15:71363108-71364428 (-70020), chr15:71385551-71386689 (-47668), chr15:71388739-71389722 (-44557), chr15:71390040-71390765 (-43385), chr15:71406261-71407941 (-26687), chr15:71580438-71581230 (+147046), chr15:71586479-71588292 (+153598), chr15:71984106-71984567 (+550549), chr15:71984637-71985112 (+551087)	9
TBC1D16	chr17:78004460-78005034 (+4900), chr17:77967154-77967671 (+42234), chr17:77953222-77953713 (+56179), chr17:77892761-77893295 (+116619), chr17:77889727-77890618 (+119474), chr17:77878067-77878658 (+131284), chr17:77877182-77877791 (+132160), chr17:77871297-77871860 (+138068), chr17:77866742-77867465 (+142543)	9
FBXO32	chr8:124673958-124674995 (-120984), chr8:124631515-124632369 (-78449), chr8:124628736-124629479 (-75615), chr8:124609808-124610439 (-56631), chr8:124608591-124609284 (-55445), chr8:124575639-124576817 (-22735), chr8:124573146-124573874 (-20017), chr8:124571867-124572254 (-18568), chr8:124548708-124549230 (+4524)	9
RAD51B	chr14:68430576-68432091 (+144838), chr14:68604391-68604989 (+318194), chr14:68610293-68610619 (+323960), chr14:68613197-68614382 (+327294), chr14:68638703-68640502 (+353107), chr14:68925615-68926333 (+639478), chr14:69031761-69032299 (+745534), chr14:69036456-69037323 (+750394), chr14:69095211-69096183 (+809201)	9
RELL1	chr4:37649716-37650189 (+38046), chr4:37543866-37544270 (+143931), chr4:37524565-37525006 (+163213), chr4:37473311-37474435 (+214126), chr4:37470969-37472166 (+216431), chr4:37463198-37464291 (+224254), chr4:37455829-37456666 (+231751), chr4:37451731-37452564 (+235851), chr4:37443222-37444022 (+244377)	9
RIN2	chr20:19263909-19264817 (-602802), chr20:19377111-19378212 (-489503), chr20:19386584-19387535 (-480105), chr20:19690519-19691361 (-176225), chr20:19693253-19693906 (-173585), chr20:19739326-19739483 (-127760), chr20:19747614-19748343 (-119186), chr20:19756101-19756955 (-110637), chr20:19764466-19765656 (-102104)	9
RNF113B	chr13:99196259-99196699 (-366958), chr13:99192503-99192869 (-363165), chr13:99137113-99137461 (-307766), chr13:99068465-99069210 (-239317), chr13:98945201-98946306 (-116233), chr13:98943797-98944319 (-114537), chr13:98825304-98826257 (+3740), chr13:98824944-98824991 (+4553)	8
RMND1	chr6:152004134-152004459 (-230981), chr6:151989863-151989952 (-216592), chr6:151985218-151985534 (-212060), chr6:151983846-151984349 (-210782), chr6:151982542-151983041 (-209476), chr6:151954479-151955524 (-181686), chr6:151954267-151954322 (-180979), chr6:151757241-151757817 (+15787)	8
REV1	chr2:100684080-100684769 (-577945), chr2:100682796-100683789 (-576813), chr2:100672773-100673409 (-566611), chr2:100273296-100273879 (-167108), chr2:100252831-100253679 (-146775), chr2:100226142-100226804 (-119993), chr2:100147897-100148233 (-41585), chr2:100047583-100047813 (+58782)	8
RHOB	chr2:20551205-20551761 (-95352), chr2:20581054-20581670 (-65473), chr2:20650363-20651018 (+3856), chr2:20668251-20669406 (+21994), chr2:20671398-20672857 (+25293), chr2:20673809-20675167 (+27653), chr2:20695740-20696614 (+49342), chr2:20798925-20799380 (+152318)	8
KL	chr13:33558974-33559422 (-31373), chr13:33664672-33665726 (+74628), chr13:33689686-33690198 (+99371), chr13:33690436-33690997 (+100146), chr13:33692547-33693227 (+102316), chr13:33693769-33694730 (+103679), chr13:33786984-33788063 (+196953), chr13:33791979-33792615 (+201726)	8
TAB2	chr6:149351945-149353577 (-286675), chr6:149353987-149354016 (-285434), chr6:149381670-149382011 (-257595), chr6:149382027-149382918 (-256963), chr6:149397265-149397992 (-241807), chr6:149398069-149398813 (-240995), chr6:149400693-149401923 (-238128), chr6:149401942-149402446 (-237242)	8
TTC39B	chr9:15400287-15402161 (-93866), chr9:15377692-15378437 (-70707), chr9:15377338-15377387 (-70005), chr9:15373455-15373641 (-66190), chr9:15287148-15287245 (+20161), chr9:15286277-15286722 (+20858), chr9:15241926-15242433 (+65178), chr9:15211106-15211536 (+96037)	8
UBE2CBP	chr6:83761462-83761914 (+13857), chr6:83718426-83718911 (+56876), chr6:83660805-83661741 (+114272), chr6:83333910-83334346 (+441417), chr6:83279350-83280656 (+495542), chr6:83279093-83279171 (+496413), chr6:83278087-83278799 (+497102), chr6:83277107-83277954 (+498014)	8
KCNK2	chr1:214809374-214809981 (-446882), chr1:214810283-214811511 (-445663), chr1:215288301-215288455 (+31818), chr1:215319219-215320648 (+63374), chr1:215646567-215646653 (+390050), chr1:215646757-215647966 (+390802), chr1:215648050-215650267 (+392599), chr1:215713147-215714033 (+457030)	8
KCNH8	chr3:18708085-18708567 (-481691), chr3:18710779-18711723 (-478766), chr3:18808749-18810025 (-380630), chr3:18814353-18815072 (-375304), chr3:18815401-18815433 (-374600), chr3:18815446-18816382 (-374103), chr3:19029291-19030046 (-160348), chr3:19030606-19031248 (-159090)	8
HSD17B2	chr16:82074182-82074390 (+5428), chr16:82074806-82075244 (+6167), chr16:82077418-82078041 (+8872), chr16:82170647-82171616 (+102274), chr16:82171655-82171808 (+102874), chr16:82171852-82173118 (+103627), chr16:82184128-82184692 (+115552), chr16:82186028-82186754 (+117533)	8
AKR1E2	chr10:3894336-3895146 (-973661), chr10:3978072-3978713 (-890009), chr10:4100797-4101403 (-767302), chr10:4225623-4226358 (-642411), chr10:4321485-4323877 (-545721), chr10:4680147-4680801 (-187928), chr10:4703908-4704519 (-164188), chr10:4705092-4705797 (-162957)	8
ANXA13	chr8:124673958-124674995 (+75170), chr8:124631515-124632369 (+117705), chr8:124628736-124629479 (+120539), chr8:124609808-124610439 (+139523), chr8:124608591-124609284 (+140709), chr8:124575639-124576817 (+173419), chr8:124573146-124573874 (+176137), chr8:124571867-124572254 (+177586)	8
AQP4	chr18:24352649-24353125 (+92829), chr18:24345431-24345845 (+100078), chr18:24326472-24327288 (+118836), chr18:24325185-24325825 (+120211), chr18:24324854-24324928 (+120825), chr18:24238639-24238672 (+207060), chr18:24237720-24238332 (+207690), chr18:24155280-24156278 (+289937)	8
MYOF	chr10:95200199-95200806 (+41571), chr10:95198349-95199131 (+43334), chr10:95196710-95198167 (+44635), chr10:95194459-95195640 (+47024), chr10:95020602-95021355 (+221095), chr10:95019478-95019952 (+222359), chr10:95019198-95019256 (+222847), chr10:95004207-95004860 (+237540)	8
PIK3R1	chr5:66530031-66532165 (-980486), chr5:67111451-67112224 (-399746), chr5:67231887-67232432 (-279424), chr5:67730951-67731245 (+219514), chr5:67830071-67830699 (+318801), chr5:67831219-67831656 (+319854), chr5:67841350-67841897 (+330040), chr5:67841922-67842438 (+330596)	8
VASH1	chr14:77117949-77118323 (-110099), chr14:77240966-77241438 (+12967), chr14:77367094-77367212 (+138918), chr14:77367335-77368177 (+139521), chr14:77371031-77371938 (+143250), chr14:77384356-77385117 (+156502), chr14:77385131-77386156 (+157409), chr14:77473761-77474737 (+246014)	8
SLC39A8	chr4:102875044-102875543 (+391361), chr4:102874261-102874672 (+392188), chr4:102852617-102853166 (+413763), chr4:102842401-102842981 (+423964), chr4:102806634-102807118 (+459779), chr4:102793469-102793975 (+472933), chr4:102786670-102787354 (+479643), chr4:102785604-102786512 (+480597)	8
SLC4A3	chr2:220941346-220941971 (+449367), chr2:220942001-220942660 (+450039), chr2:220958812-220959265 (+466747), chr2:220968190-220968877 (+476242), chr2:221089537-221090486 (+597720), chr2:221091846-221092359 (+599811), chr2:221398257-221398676 (+906175), chr2:221399029-221399295 (+906870)	8
CYP26A1	chr10:95004207-95004860 (+170887), chr10:95019198-95019256 (+185580), chr10:95019478-95019952 (+186068), chr10:95020602-95021355 (+187332), chr10:95194459-95195640 (+361403), chr10:95196710-95198167 (+363792), chr10:95198349-95199131 (+365093), chr10:95200199-95200806 (+366856)	8
PLK2	chr5:57483150-57484552 (+272115), chr5:57479127-57479973 (+276416), chr5:57477624-57478322 (+277993), chr5:57422773-57423225 (+332967), chr5:57391063-57391738 (+364565), chr5:57389701-57390410 (+365910), chr5:57365398-57366240 (+390147), chr5:57158094-57158944 (+597447)	8
DOPEY2	chr21:37536565-37537136 (+12), chr21:37560218-37561115 (+23828), chr21:37565424-37566106 (+28926), chr21:37566380-37566421 (+29562), chr21:37574411-37574929 (+37831), chr21:37575034-37575522 (+38439), chr21:37607422-37607854 (+70799), chr21:37674186-37674865 (+137687)	8
EBAG9	chr8:110492507-110492802 (-59274), chr8:110582622-110583421 (+31093), chr8:110592223-110592827 (+40596), chr8:110593143-110593639 (+41462), chr8:110594174-110594585 (+42451), chr8:110605306-110606361 (+53905), chr8:110619572-110619608 (+67661), chr8:110649701-110651244 (+98544)	8
LYZL1	chr10:29172655-29173729 (-404798), chr10:29311436-29311914 (-266315), chr10:29393606-29394880 (-183747), chr10:29395033-29395629 (-182659), chr10:29396655-29397343 (-180991), chr10:29568530-29568972 (-9239), chr10:29592219-29592948 (+14594), chr10:29911410-29911790 (+333610)	8
C14orf159	chr14:91553423-91554243 (-27146), chr14:91554282-91554687 (-26494), chr14:91575517-91576085 (-5178), chr14:91591155-91591802 (+10500), chr14:91592005-91592062 (+11055), chr14:91592443-91593513 (+11999), chr14:91593642-91594322 (+13003), chr14:91630875-91631545 (+50231)	8
S100G	chrX:16597389-16598052 (-70560), chrX:16598357-16598502 (-69851), chrX:16607242-16607946 (-60687), chrX:16635129-16636076 (-32678), chrX:16636961-16637906 (-30847), chrX:16680142-16681601 (+12591)	8
SATB1	chr3:19030606-19031248 (-550662), chr3:19029291-19030046 (-549404), chr3:18815446-18816382 (-335649), chr3:18815401-18815433 (-335152), chr3:18814353-18815072 (-334448), chr3:18808749-18810025 (-329122), chr3:18710779-18711723 (-230986), chr3:18708085-18708567 (-228061)	8
BANK1	chr4:102785604-102786512 (+74294), chr4:102786670-102787354 (+75248), chr4:102793469-102793975 (+81958), chr4:102806634-102807118 (+95112), chr4:102842401-102842981 (+130927), chr4:102852617-102853166 (+141128), chr4:102874261-102874672 (+162703), chr4:102875044-102875543 (+163530)	8
BCL6	chr3:187778809-187779319 (-315551), chr3:187753940-187755254 (-291084), chr3:187749033-187749479 (-285743), chr3:187646262-187647217 (-183227), chr3:187634721-187635549 (-171622), chr3:187526205-187528490 (-63835), chr3:187498663-187499281 (-35459), chr3:187464784-187465248 (-1503)	8
BFSP2	chr3:133105597-133105890 (-13046), chr3:133147271-133147835 (+28763), chr3:133166874-133166977 (+48136), chr3:133167216-133168157 (+48897), chr3:133171418-133172488 (+53163), chr3:133178040-133178919 (+59690), chr3:133179300-133179420 (+60570)	7
BCAS4	chr20:49377789-49378793 (-33176), chr20:49379246-49379887 (-31900), chr20:49380195-49381222 (-30758), chr20:49415069-49415649 (+3892), chr20:49431371-49431843 (+20140), chr20:49434147-49434807 (+23010), chr20:49440579-49441279 (+29462)	7
ATP11B	chr3:181664957-181665899 (-845863), chr3:181989399-181989669 (-521757), chr3:182002463-182003279 (-508420), chr3:182403710-182404483 (-107194), chr3:182426142-182427405 (-84517), chr3:182456890-182457383 (-54154), chr3:182607512-182608425 (+96678)	7
ARHGAP35	chr19:47377385-47377892 (-44294), chr19:47409490-47410277 (-12049), chr19:47412457-47413526 (-8941), chr19:47417158-47417423 (-4642), chr19:47423905-47424254 (+2147), chr19:47428416-47429019 (+6785), chr19:47479298-47479939 (+57686)	7
GPR176	chr15:40080727-40081883 (+131788), chr15:40080117-40080602 (+132733), chr15:40013028-40013846 (+199656), chr15:40011300-40012486 (+201200), chr15:39960278-39961555 (+252176), chr15:39922120-39922576 (+290745), chr15:39914912-39915586 (+297844)	7
TOMM20	chr1:235123064-235123746 (+168851), chr1:235053832-235054352 (+238164), chr1:235010910-235012856 (+280373), chr1:235009896-235010836 (+281890), chr1:234859226-234861239 (+432023), chr1:234853365-234853870 (+438638), chr1:234793747-234794454 (+498155)	7
TMEM66	chr8:29666931-29667720 (+273323), chr8:29609666-29610394 (+330619), chr8:29595863-29596394 (+344520), chr8:29512837-29513848 (+427306), chr8:29451504-29451919 (+488937), chr8:29399731-29400219 (+540674), chr8:29361138-29361541 (+579309)	7
SLC16A6	chr17:66452014-66453119 (-165162), chr17:66437185-66438285 (-150330), chr17:66435743-66436686 (-148810), chr17:66432133-66432850 (-145087), chr17:66374448-66375443 (-87541), chr17:66292759-66293805 (-5877), chr17:66288259-66288820 (-1135)	7
E2F6	chr2:11664403-11665138 (-58474), chr2:11648418-11649013 (-42419), chr2:11646054-11646532 (-39996), chr2:11641161-11641765 (-35166), chr2:11638361-11639255 (-32511), chr2:11638168-11638334 (-31954), chr2:11620477-11621337 (-14610)	7
MORC3	chr21:37560218-37561115 (-131820), chr21:37565424-37566106 (-126722), chr21:37566380-37566421 (-126086), chr21:37574411-37574929 (-117817), chr21:37575034-37575522 (-117209), chr21:37607422-37607854 (-84849), chr21:37674186-37674865 (-17961)	7
PLEKHF2	chr8:96078882-96080017 (-66499), chr8:96112802-96113696 (-32700), chr8:96123179-96124064 (-22327), chr8:96124608-96125496 (-20897), chr8:96125621-96126194 (-20041), chr8:96236110-96236674 (+90443), chr8:96237601-96238125 (+91914)	7
PREP	chr6:106243802-106244382 (-393093), chr6:106076143-106076896 (-225521), chr6:106057149-106057797 (-206474), chr6:106056025-106056466 (-205247), chr6:106055224-106055427 (-204327), chr6:105821764-105822441 (+28896), chr6:105807771-105808257 (+42985)	7
DNAJC5B	chr8:66932927-66933763 (-446), chr8:66933997-66935217 (+816), chr8:66938528-66939320 (+5133), chr8:66939966-66940636 (+6510), chr8:67002949-67003711 (+69539), chr8:67026586-67027328 (+93166), chr8:67032429-67033953 (+99400)	7
SLC38A2	chr12:46888061-46888544 (-121658), chr12:46887206-46888032 (-120974), chr12:46886007-46887021 (-119869), chr12:46867378-46867972 (-101030), chr12:46783879-46784543 (-17566), chr12:46782325-46783400 (-16218), chr12:46780043-46780830 (-13792)	7
SLC38A4	chr12:46888061-46888544 (+331477), chr12:46887206-46888032 (+332161), chr12:46886007-46887021 (+333266), chr12:46867378-46867972 (+352105), chr12:46783879-46784543 (+435569), chr12:46782325-46783400 (+436917), chr12:46780043-46780830 (+439343)	7
CDYL2	chr16:80933983-80934739 (-96186), chr16:80885514-80885896 (-47530), chr16:80871322-80872424 (-33698), chr16:80870714-80871295 (-32830), chr16:80653775-80654295 (+184140), chr16:80648758-80649164 (+189214), chr16:80647645-80648364 (+190170)	7
SLC9A7P1	chr12:98798992-98799566 (+51644), chr12:97961216-97963602 (+888514), chr12:97950801-97951745 (+899650), chr12:97949569-97950716 (+900780), chr12:97946541-97947023 (+904141), chr12:97946175-97946495 (+904588), chr12:97930097-97930822 (+920463)	7
CCDC6	chr10:62136146-62136677 (-469998), chr10:61965409-61965901 (-299241), chr10:61792514-61792969 (-126328), chr10:61791126-61791889 (-125094), chr10:61755411-61755915 (-89249), chr10:61724934-61725669 (-58888), chr10:61639031-61639521 (+27138)	7
C8orf4	chr8:40203388-40204138 (+192776), chr8:40217680-40218829 (+207268), chr8:40230645-40231391 (+220031), chr8:40263332-40264381 (+252870), chr8:40301413-40301480 (+290460), chr8:40454209-40455035 (+443635), chr8:40457668-40458440 (+447067)	7
WIPI1	chr17:66459539-66460198 (-6216), chr17:66452014-66453119 (+1086), chr17:66437185-66438285 (+15918), chr17:66435743-66436686 (+17438), chr17:66432133-66432850 (+21161), chr17:66374448-66375443 (+78707), chr17:66292759-66293805 (+160371)	7
XBP1	chr22:29219696-29220229 (-23403), chr22:29218441-29219682 (-22502), chr22:29217493-29218424 (-21399), chr22:29215202-29216390 (-19236), chr22:29214016-29215184 (-18040), chr22:29209199-29210402 (-13241), chr22:29203325-29203570 (-6888)	7
ZNRF3	chr22:29203325-29203570 (-76307), chr22:29209199-29210402 (-69954), chr22:29214016-29215184 (-65155), chr22:29215202-29216390 (-63959), chr22:29217493-29218424 (-61796), chr22:29218441-29219682 (-60693), chr22:29219696-29220229 (-59792)	7
ZMAT4	chr8:40457668-40458440 (+297289), chr8:40454209-40455035 (+300721), chr8:40301413-40301480 (+453896), chr8:40263332-40264381 (+491486), chr8:40230645-40231391 (+524325), chr8:40217680-40218829 (+537088), chr8:40203388-40204138 (+551580)	7
MYO16	chr13:109511459-109512441 (+263450), chr13:109739811-109740828 (+491820), chr13:109895679-109896250 (+647465), chr13:109909337-109909758 (+661048), chr13:110161818-110162442 (+913630), chr13:110228551-110229309 (+980430), chr13:110237225-110237502 (+988864)	7
AFF3	chr2:100684080-100684769 (+37620), chr2:100682796-100683789 (+38752), chr2:100672773-100673409 (+48954), chr2:100273296-100273879 (+448457), chr2:100252831-100253679 (+468790), chr2:100226142-100226804 (+495572), chr2:100147897-100148233 (+573980)	7
HHAT	chr1:211089180-211090300 (+588144), chr1:211186559-211187338 (+685353), chr1:211190444-211191331 (+689292), chr1:211194542-211195198 (+693274), chr1:211241923-211242967 (+740849), chr1:211256391-211256823 (+755011), chr1:211286740-211288451 (+786000)	7
KCNH1	chr1:211286740-211288451 (+19861), chr1:211256391-211256823 (+50850), chr1:211241923-211242967 (+65012), chr1:211194542-211195198 (+112587), chr1:211190444-211191331 (+116569), chr1:211186559-211187338 (+120508), chr1:211089180-211090300 (+217717)	7
KCTD3	chr1:215288301-215288455 (-452357), chr1:215319219-215320648 (-420801), chr1:215646567-215646653 (-94125), chr1:215646757-215647966 (-93373), chr1:215648050-215650267 (-91576), chr1:215713147-215714033 (-27145), chr1:215740159-215740817 (-247)	7
IRX3	chr16:54679337-54679716 (-359149), chr16:54574620-54575389 (-254627), chr16:54464225-54464698 (-144084), chr16:54459229-54460680 (-139577), chr16:54115236-54115518 (+205001), chr16:54114540-54115033 (+205591), chr16:53789005-53789407 (+531172)	7
CTPS	chr1:41333982-41334307 (-110862), chr1:41363798-41364824 (-80696), chr1:41364935-41365609 (-79735), chr1:41384997-41385562 (-59727), chr1:41395839-41396148 (-49013), chr1:41409983-41410476 (-34777), chr1:41410557-41411032 (-34212)	7
CITED4	chr1:41410557-41411032 (-82777), chr1:41409983-41410476 (-82212), chr1:41395839-41396148 (-67976), chr1:41384997-41385562 (-57262), chr1:41364935-41365609 (-37254), chr1:41363798-41364824 (-36293), chr1:41333982-41334307 (-6127)	7
CELSR1	chr22:46970851-46971336 (-38027), chr22:46888494-46888748 (+44446), chr22:46887678-46888480 (+44988), chr22:46865532-46866282 (+67160), chr22:46862960-46863342 (+69916), chr22:46861509-46862395 (+71115), chr22:46840214-46840572 (+92674)	7
PGCP	chr8:97940103-97941153 (+283129), chr8:97951765-97952389 (+294578), chr8:97981499-97981922 (+324212), chr8:98037532-98037947 (+380241), chr8:98038045-98038705 (+380876), chr8:98094364-98094919 (+437143), chr8:98278435-98279154 (+621296)	7
CPN2	chr3:194041361-194042022 (+30365), chr3:193988100-193988835 (+83589), chr3:193929366-193931371 (+141688), chr3:193902031-193902783 (+169650), chr3:193878667-193879422 (+193012), chr3:193876020-193877466 (+195314), chr3:193873815-193874374 (+197962)	7
UMPS	chr3:124017787-124018192 (-431223), chr3:124035719-124036560 (-413073), chr3:124552315-124553352 (+103621), chr3:124553372-124553397 (+104172), chr3:124560264-124560793 (+111316), chr3:124572163-124572724 (+123231), chr3:124597427-124597874 (+148438)	7
NRG3	chr10:82707027-82707485 (-927814), chr10:82723794-82724434 (-910956), chr10:82725599-82726952 (-908794), chr10:82727054-82727714 (-907686), chr10:82767403-82768126 (-867305), chr10:82800533-82801261 (-834173), chr10:83665406-83666049 (+30658)	7
TSPAN14	chr10:82201599-82201939 (-12269), chr10:82707027-82707485 (+493218), chr10:82723794-82724434 (+510076), chr10:82725599-82726952 (+512238), chr10:82727054-82727714 (+513346), chr10:82767403-82768126 (+553727), chr10:82800533-82801261 (+586859)	7
PARD6B	chr20:49286565-49287612 (-60992), chr20:49341061-49341919 (-6591), chr20:49342194-49342740 (-5614), chr20:49343436-49344801 (-3962), chr20:49377789-49378793 (+30210), chr20:49379246-49379887 (+31486), chr20:49380195-49381222 (+32628)	7
OR4B1	chr11:48019886-48020741 (-218048), chr11:48063372-48063962 (-174695), chr11:48071356-48071971 (-166698), chr11:48075735-48076331 (-162329), chr11:48077163-48077959 (-160801), chr11:48107905-48108498 (-130160), chr11:48112639-48113154 (-125465)	7
OSR1	chr2:19875120-19875587 (-316982), chr2:19874745-19875111 (-316556), chr2:19340360-19341230 (+217577), chr2:19302308-19303109 (+255663), chr2:19272675-19273192 (+285438), chr2:19005697-19006149 (+552449), chr2:18981528-18982209 (+576503)	7
SYBU	chr8:110649701-110651244 (+6578), chr8:110619572-110619608 (+37461), chr8:110605306-110606361 (+51217), chr8:110594174-110594585 (+62671), chr8:110593143-110593639 (+63660), chr8:110592223-110592827 (+64526), chr8:110582622-110583421 (+74029)	7
STK24	chr13:99302435-99303086 (-73365), chr13:99196259-99196699 (+32917), chr13:99192503-99192869 (+36710), chr13:99137113-99137461 (+92109), chr13:99068465-99069210 (+160558), chr13:98945201-98946306 (+283642), chr13:98943797-98944319 (+285338)	7
RASEF	chr9:86088596-86089079 (-410795), chr9:86047023-86047555 (-369246), chr9:86046549-86046987 (-368725), chr9:85747523-85748183 (-69810), chr9:85554317-85554863 (+123453), chr9:85553283-85553897 (+124453), chr9:85538119-85538684 (+139641)	7
RASGRP1	chr15:39565857-39566791 (-709317), chr15:39480997-39481449 (-624216), chr15:39187196-39188109 (-330646), chr15:39170931-39171514 (-314216), chr15:39169366-39170302 (-312827), chr15:39166545-39166608 (-309570), chr15:39165370-39165851 (-308604)	7
RAB6C	chr2:129861437-129862457 (-875288), chr2:129886460-129887002 (-850504), chr2:130671781-130673067 (-64811), chr2:130692665-130693588 (-44108), chr2:130702817-130703635 (-34009), chr2:130715348-130715890 (-21616), chr2:130716239-130716721 (-20755)	7
PTGER4	chr5:39712641-39713565 (-966929), chr5:39716348-39717384 (-963166), chr5:39836445-39837068 (-843275), chr5:40254414-40254856 (-425397), chr5:40429380-40430130 (-250277), chr5:40477787-40478568 (-201854), chr5:40552156-40552986 (-127461)	7
PTPN1	chr20:49011755-49012335 (-114846), chr20:49029608-49029982 (-97096), chr20:49031248-49032105 (-95214), chr20:49067530-49068431 (-58910), chr20:49286565-49287612 (+160198), chr20:49341061-49341919 (+214599), chr20:49342194-49342740 (+215576)	7
PTPRS	chr19:5021075-5021522 (+319515), chr19:4991379-4992731 (+348759), chr19:4976256-4977382 (+363995), chr19:4972479-4973412 (+367868), chr19:4972016-4972122 (+368745), chr19:4971382-4971702 (+369272), chr19:4970609-4971246 (+369886)	7
PTPRJ	chr11:48019886-48020741 (+18204), chr11:48063372-48063962 (+61557), chr11:48071356-48071971 (+69554), chr11:48075735-48076331 (+73923), chr11:48077163-48077959 (+75451), chr11:48107905-48108498 (+106092), chr11:48112639-48113154 (+110787)	7
ESR1	chr6:151954267-151954322 (-174159), chr6:151954479-151955524 (-173452), chr6:151982542-151983041 (-145662), chr6:151983846-151984349 (-144356), chr6:151985218-151985534 (-143078), chr6:151989863-151989952 (-138546), chr6:152004134-152004459 (-124157)	7
ITIH6	chrX:54774938-54775356 (+49526), chrX:54773939-54774692 (+50357), chrX:54722277-54723178 (+101945), chrX:54721453-54721962 (+102965), chrX:54667022-54667630 (+157347)	6
PHEX	chrX:21991381-21991883 (-59289), chrX:21991933-21992574 (-58667), chrX:22014379-22014701 (-36381), chrX:22135176-22136209 (+84772), chrX:22152690-22153749 (+102299)	6
GNL3L	chrX:54667022-54667630 (+110682), chrX:54721453-54721962 (+165064), chrX:54722277-54723178 (+166084), chrX:54773939-54774692 (+217672), chrX:54774938-54775356 (+218503)	6
GRPR	chrX:16597389-16598052 (+456297), chrX:16598357-16598502 (+457006), chrX:16607242-16607946 (+466170), chrX:16635129-16636076 (+494179), chrX:16636961-16637906 (+496010)	6
BARX2	chr11:129160826-129162128 (-84404), chr11:129162517-129163157 (-83044), chr11:129185457-129186369 (-59968), chr11:129188772-129189645 (-56672), chr11:129192593-129193480 (-52844), chr11:129193738-129195037 (-51493)	6
BAMBI	chr10:29172655-29173729 (+206768), chr10:29311436-29311914 (+345251), chr10:29393606-29394880 (+427819), chr10:29395033-29395629 (+428907), chr10:29396655-29397343 (+430575), chr10:29568530-29568972 (+602327)	6
B4GALT1	chr9:33220587-33222498 (-54187), chr9:33163547-33163923 (+3621), chr9:33162613-33163377 (+4361), chr9:33157145-33157617 (+9975), chr9:33106743-33107324 (+60322), chr9:33081776-33081779 (+85578)	6
GPR68	chr14:91742578-91743341 (-32108), chr14:91630875-91631545 (+79642), chr14:91593642-91594322 (+116870), chr14:91592443-91593513 (+117874), chr14:91592005-91592062 (+118818), chr14:91591155-91591802 (+119373)	6
GRIK4	chr11:120497174-120498147 (-33317), chr11:120498986-120499505 (-31732), chr11:120507444-120508612 (-22950), chr11:120527539-120528569 (-2924), chr11:120685356-120686135 (+154768), chr11:120686309-120686963 (+155658)	6
GATA4	chr8:11429615-11429760 (-132029), chr8:11431049-11431493 (-130446), chr8:11570558-11571143 (+9134), chr8:11574030-11574770 (+12683), chr8:11574822-11575533 (+13461), chr8:11587984-11588724 (+26637)	6
GLI2	chr2:121155452-121156101 (-399090), chr2:121156619-121157279 (-397918), chr2:121178974-121179326 (-375717), chr2:121180077-121180370 (-374643), chr2:121227584-121228258 (-326946), chr2:121387609-121388267 (-166929)	6
SERPINA1	chr14:94879078-94879750 (-22385), chr14:94878579-94878638 (-21580), chr14:94870463-94871353 (-13879), chr14:94856646-94857694 (-141), chr14:94841951-94842773 (+14667), chr14:94822679-94823499 (+33940)	6
SEC11C	chr18:56675094-56675163 (-131996), chr18:56675438-56676179 (-131316), chr18:56689937-56690412 (-116950), chr18:56690475-56690807 (-116484), chr18:56720247-56721360 (-86321), chr18:56721766-56722693 (-84895)	6
2010-09-01	chr2:110448265-110448813 (-76756), chr2:110312852-110313354 (+58680), chr2:110096962-110098130 (+274237), chr2:110088852-110088920 (+282897), chr2:110086738-110087520 (+284654), chr2:110024070-110024670 (+347413)	6
RPLP1	chr15:69759916-69760487 (+15043), chr15:69774899-69775546 (+30064), chr15:69886602-69887390 (+141837), chr15:69887612-69888191 (+142743), chr15:70384188-70384659 (+639265), chr15:70385588-70386506 (+640888)	6
RSPO2	chr8:108748950-108749538 (+346669), chr8:108700062-108700908 (+395428), chr8:108621054-108621858 (+474457), chr8:108620737-108621025 (+475032), chr8:108618656-108619347 (+476911), chr8:108521134-108521857 (+574417)	6
DNASE1L3	chr3:58135091-58135458 (+65123), chr3:58088531-58089281 (+111492), chr3:58087269-58088269 (+112629), chr3:58082531-58083052 (+117606), chr3:58034895-58034947 (+165477), chr3:58025703-58026230 (+174431)	6
DKK1	chr10:54069730-54070223 (-4064), chr10:54108803-54109272 (+34997), chr10:54113717-54114281 (+39958), chr10:54115540-54116056 (+41757), chr10:54168887-54169449 (+95127), chr10:54203013-54204048 (+129490)	6
PRDM1	chr6:106055224-106055427 (-478869), chr6:106056025-106056466 (-477949), chr6:106057149-106057797 (-476722), chr6:106076143-106076896 (-457675), chr6:106243802-106244382 (-290103), chr6:106567314-106567994 (+33459)	6
FLNB	chr3:58025703-58026230 (+31840), chr3:58034895-58034947 (+40794), chr3:58082531-58083052 (+88665), chr3:58087269-58088269 (+93642), chr3:58088531-58089281 (+94779), chr3:58135091-58135458 (+141148)	6
FOXP1	chr3:71553723-71554041 (-259566), chr3:71159854-71160563 (+134107), chr3:70854587-70855057 (+439494), chr3:70852969-70853747 (+440958), chr3:70852850-70852967 (+441407), chr3:70787716-70787948 (+506484)	6
DUSP6	chr12:89764224-89764592 (-18112), chr12:89229419-89230407 (+516383), chr12:89195485-89196058 (+550524), chr12:89151536-89152453 (+594301), chr12:89144271-89145234 (+601543), chr12:89078000-89078913 (+667839)	6
EDN2	chr1:42344179-42344442 (-393967), chr1:42333728-42334501 (-383771), chr1:42331722-42332505 (-381770), chr1:42325669-42326893 (-375937), chr1:42268657-42268778 (-318374), chr1:41904237-41904790 (+45830)	6
ZNF608	chr5:124821618-124821782 (-740835), chr5:124820566-124821520 (-740178), chr5:124817157-124818135 (-736781), chr5:124814241-124814927 (-733719), chr5:124241986-124242791 (-161524), chr5:123998215-123998904 (+82305)	6
PIP	chr7:142793086-142793608 (-35827), chr7:142817657-142818747 (-10972), chr7:142823117-142824193 (-5519), chr7:142826160-142827214 (-2487), chr7:142827515-142828241 (-1296), chr7:142843866-142844835 (+15177)	6
ZMIZ1	chr10:80349296-80349819 (-479234), chr10:80502443-80502829 (-326156), chr10:80853383-80854269 (+25034), chr10:80886642-80887308 (+58183), chr10:80887994-80889147 (+59779), chr10:80916436-80918955 (+88904)	6
ZNF532	chr18:56675094-56675163 (+145068), chr18:56675438-56676179 (+145748), chr18:56689937-56690412 (+160114), chr18:56690475-56690807 (+160580), chr18:56720247-56721360 (+190743), chr18:56721766-56722693 (+192169)	6
ZFP36L2	chr2:43710015-43710780 (-256653), chr2:43705573-43706277 (-252180), chr2:43690149-43691075 (-236867), chr2:43682951-43683972 (-229717), chr2:43679247-43680127 (-225942), chr2:43503466-43504104 (-50040)	6
VAV3	chr1:108309360-108310762 (+197484), chr1:108281089-108281981 (+226010), chr1:108219032-108219568 (+288245), chr1:108186218-108186893 (+320989), chr1:108168788-108169593 (+338354), chr1:108135637-108137028 (+371212)	6
CADM1	chr11:115585926-115586544 (-210994), chr11:115497795-115498698 (-123006), chr11:115497467-115497698 (-122342), chr11:115369888-115370517 (+5038), chr11:115368962-115369551 (+5984), chr11:115341958-115342718 (+32903)	6
CASZ1	chr1:10878709-10879048 (-22172), chr1:10805990-10806479 (+50472), chr1:10656988-10657275 (+199575), chr1:10589841-10589982 (+266795), chr1:10588380-10589596 (+267719), chr1:10576241-10577022 (+280075)	6
CD180	chr5:67231887-67232432 (-739543), chr5:67111451-67112224 (-619221), chr5:66530031-66532165 (-38481), chr5:66510698-66512394 (-18929), chr5:66450617-66451111 (+41753), chr5:66037071-66037673 (+455245)	6
SNX19	chr11:130720157-130720810 (+65898), chr11:130523361-130524489 (+262457), chr11:130417580-130418130 (+368527), chr11:130402782-130403566 (+383208), chr11:130358882-130359615 (+427133), chr11:130351199-130352173 (+434696)	6
SLC6A6	chr3:14265459-14265692 (-178530), chr3:14266443-14266906 (-177431), chr3:14290275-14291034 (-153451), chr3:14377633-14378419 (-66080), chr3:14454170-14455027 (+10493), chr3:14455040-14455447 (+11138)	6
CDV3	chr3:133147271-133147835 (-144881), chr3:133166874-133166977 (-125508), chr3:133167216-133168157 (-124747), chr3:133171418-133172488 (-120481), chr3:133178040-133178919 (-113954), chr3:133179300-133179420 (-113074)	6
HEBP2	chr6:138548459-138548866 (-176673), chr6:138552408-138553147 (-172558), chr6:138580167-138580587 (-144959), chr6:138708668-138709013 (-16495), chr6:138903527-138904154 (+178505), chr6:138985123-138985414 (+259933)	6
NINJ2	chr12:853017-853643 (-80575), chr12:834126-834834 (-61725), chr12:740926-741950 (+31317), chr12:707208-707763 (+65269), chr12:706274-706988 (+66124), chr12:680549-681517 (+91722)	6
NCALD	chr8:103119969-103120948 (+16103), chr8:102797773-102798387 (+338482), chr8:102532721-102533276 (+603563), chr8:102517681-102518586 (+618428), chr8:102516196-102517342 (+619793), chr8:102507337-102508114 (+628836)	6
NEDD1	chr12:97930097-97930822 (+629459), chr12:97946175-97946495 (+645334), chr12:97946541-97947023 (+645781), chr12:97949569-97950716 (+649142), chr12:97950801-97951745 (+650272), chr12:97961216-97963602 (+661408)	6
HS1BP3	chr2:20798925-20799380 (+51711), chr2:20695740-20696614 (+154687), chr2:20673809-20675167 (+176376), chr2:20671398-20672857 (+178736), chr2:20668251-20669406 (+182035), chr2:20650363-20651018 (+200173)	6
INSC	chr11:15307296-15307706 (+173531), chr11:15307775-15308716 (+174276), chr11:15308801-15309092 (+174977), chr11:15335282-15335903 (+201623), chr11:15636817-15637732 (+503305), chr11:15639770-15640705 (+506268)	6
INSM1	chr20:20177318-20177664 (-171274), chr20:20185726-20186456 (-162674), chr20:20434939-20435451 (+86430), chr20:20529241-20529898 (+180805), chr20:20551904-20552552 (+203463), chr20:20554389-20554856 (+205858)	6
INHBB	chr2:121155452-121156101 (+52058), chr2:121156619-121157279 (+53230), chr2:121178974-121179326 (+75431), chr2:121180077-121180370 (+76505), chr2:121227584-121228258 (+124202), chr2:121387609-121388267 (+284219)	6
ANK3	chr10:62136146-62136677 (+13222), chr10:61965409-61965901 (+183979), chr10:61792514-61792969 (+356892), chr10:61791126-61791889 (+358126), chr10:61755411-61755915 (+393971), chr10:61724934-61725669 (+424332)	6
ADAMTS15	chr11:130351199-130352173 (+32817), chr11:130358882-130359615 (+40380), chr11:130402782-130403566 (+84305), chr11:130417580-130418130 (+98986), chr11:130523361-130524489 (+205056), chr11:130720157-130720810 (+401615)	6
ADAM30	chr1:120604000-120605378 (-165542), chr1:120587240-120588006 (-148476), chr1:120573997-120575461 (-135582), chr1:120539547-120540061 (-100657), chr1:120511225-120511624 (-72278), chr1:120436447-120436768 (+2539)	6
ARHGAP15	chr2:143920468-143921634 (+34152), chr2:143921656-143921747 (+34803), chr2:143922751-143923497 (+36225), chr2:143976115-143976592 (+89455), chr2:144090765-144091580 (+204274), chr2:144092166-144093010 (+205689)	6
ARHGAP32	chr11:129193738-129195037 (-132295), chr11:129192593-129193480 (-130944), chr11:129188772-129189645 (-127116), chr11:129185457-129186369 (-123820), chr11:129162517-129163157 (-100744), chr11:129160826-129162128 (-99384)	6
ANGPT1	chr8:108748950-108749538 (-238990), chr8:108700062-108700908 (-190231), chr8:108621054-108621858 (-111202), chr8:108620737-108621025 (-110627), chr8:108618656-108619347 (-108748), chr8:108521134-108521857 (-11242)	6
ITPK1	chr14:93477687-93478640 (+104099), chr14:93474637-93475069 (+107410), chr14:93452519-93453088 (+129459), chr14:93440139-93440929 (+141729), chr14:93439377-93439930 (+142609), chr14:93429909-93430043 (+152287)	6
ITGB5	chr3:124639576-124640009 (-33649), chr3:124597427-124597874 (+8493), chr3:124572163-124572724 (+33700), chr3:124560264-124560793 (+45615), chr3:124553372-124553397 (+52759), chr3:124552315-124553352 (+53310)	6
CRISPLD2	chr16:84757932-84758734 (-95254), chr16:84759009-84760034 (-94065), chr16:84764005-84764587 (-89291), chr16:84780572-84781009 (-72796), chr16:84875407-84875993 (+22113), chr16:85028243-85028927 (+174998)	6
KCNMB2	chr3:177320196-177321118 (-933567), chr3:177336399-177337716 (-917166), chr3:177353202-177354158 (-900544), chr3:177527754-177528585 (-726054), chr3:177888358-177888916 (-365587), chr3:178453758-178454556 (+199933)	6
CHGA	chr14:93429909-93430043 (+40531), chr14:93439377-93439930 (+50209), chr14:93440139-93440929 (+51089), chr14:93452519-93453088 (+63359), chr14:93474637-93475069 (+85408), chr14:93477687-93478640 (+88719)	6
PALM2-AKAP2	chr9:112318112-112318833 (-224104), chr9:112318903-112319516 (-223367), chr9:112851828-112852748 (+309711), chr9:112913583-112914379 (+371404), chr9:112951221-112951824 (+408946), chr9:112969186-112969951 (+426992)	6
TSKU	chr11:76481778-76482368 (-12212), chr11:76483431-76484173 (-10483), chr11:76484473-76485390 (-9353), chr11:76499648-76500250 (+5664), chr11:76512479-76513339 (+18624), chr11:76547140-76547758 (+53164)	6
TRMU	chr22:46840214-46840572 (+109095), chr22:46861509-46862395 (+130654), chr22:46862960-46863342 (+131853), chr22:46865532-46866282 (+134609), chr22:46887678-46888480 (+156781), chr22:46888494-46888748 (+157323)	6
TRIM55	chr8:66938528-66939320 (-100354), chr8:66939966-66940636 (-98977), chr8:67002949-67003711 (-35948), chr8:67026586-67027328 (-12321), chr8:67032429-67033953 (-6087), chr8:67036013-67037270 (-2636)	6
TXNDC2	chr18:9757517-9758293 (-127818), chr18:9803953-9804554 (-81469), chr18:9808477-9809205 (-76882), chr18:9824371-9824829 (-61123), chr18:9825469-9826018 (-59979), chr18:9835239-9835683 (-50262)	6
NRIP1	chr21:16714855-16715831 (-278217), chr21:16583753-16584375 (-146938), chr21:16582269-16583199 (-145608), chr21:16580170-16580739 (-143329), chr21:16235562-16236196 (+201247), chr21:16084265-16085007 (+352490)	6
NTNG1	chr1:108135637-108137028 (+453704), chr1:108168788-108169593 (+486562), chr1:108186218-108186893 (+503927), chr1:108219032-108219568 (+536671), chr1:108281089-108281981 (+598906), chr1:108309360-108310762 (+627432)	6
NR2F2	chr15:96133336-96133929 (-740478), chr15:96594838-96595281 (-279051), chr15:96595395-96595730 (-278548), chr15:96878780-96878788 (+4673), chr15:96879917-96880718 (+6207), chr15:96882569-96882966 (+8657)	6
ERRFI1	chr1:8262654-8263029 (-176449), chr1:8242214-8242897 (-156163), chr1:8229723-8230522 (-143730), chr1:8180489-8181598 (-94651), chr1:8086339-8086656 (-105), chr1:8031030-8031495 (+55130)	6
EVL	chr14:100477923-100478871 (-53354), chr14:100491432-100492067 (-40001), chr14:100497764-100498814 (-33462), chr14:100525754-100526239 (-5754), chr14:100603348-100604087 (+71967), chr14:100622256-100623078 (+90916)	6
FADD	chr11:69952104-69952964 (-96735), chr11:69962712-69963176 (-86325), chr11:70015710-70016319 (-33254), chr11:70029473-70030100 (-19482), chr11:70079185-70080026 (+30337), chr11:70093752-70094312 (+44763)	6
RAB31	chr18:9757517-9758293 (+49677), chr18:9803953-9804554 (+96026), chr18:9808477-9809205 (+100613), chr18:9824371-9824829 (+116372), chr18:9825469-9826018 (+117516), chr18:9835239-9835683 (+127233)	6
SVIL	chr10:30129359-30129702 (-205630), chr10:30128616-30129227 (-205021), chr10:30100929-30101582 (-177355), chr10:30080628-30081335 (-157081), chr10:29911410-29911790 (+12301), chr10:29592219-29592948 (+331317)	6
SYT8	chr11:1793702-1794193 (-61726), chr11:1817287-1818429 (-37816), chr11:1848377-1848973 (-6999), chr11:1849320-1849789 (-6119), chr11:1849794-1850757 (-5398), chr11:1855122-1855856 (-185)	6
KIF13B	chr8:29146510-29147115 (-26203), chr8:29144094-29145065 (-23970), chr8:29140382-29140924 (-20043), chr8:29116736-29117241 (+3621), chr8:29047541-29047871 (+72904), chr8:29042746-29043416 (+77529)	6
KLF4	chr9:111240740-111241833 (-989240), chr9:111239686-111240114 (-987853), chr9:110893135-110893812 (-641427), chr9:110303645-110304337 (-51944), chr9:110266724-110267499 (-15065), chr9:110200240-110201279 (+51287)	6
THADA	chr2:43710015-43710780 (+112787), chr2:43705573-43706277 (+117260), chr2:43690149-43691075 (+132573), chr2:43682951-43683972 (+139723), chr2:43679247-43680127 (+143498), chr2:43503466-43504104 (+319400)	6
EFNA5	chr5:106907254-106907803 (+99067), chr5:106897538-106898062 (+108796), chr5:106892478-106893560 (+113577), chr5:106891307-106891808 (+115038), chr5:106761505-106762017 (+244835), chr5:106553196-106553838 (+453079)	6
RFC3	chr13:34020945-34021884 (-370791), chr13:34026980-34027863 (-364784), chr13:34083852-34084443 (-308058), chr13:34216547-34217714 (-175075), chr13:34698758-34699366 (+306856), chr13:34921884-34922283 (+529878)	6
RERE	chr1:8849414-8850053 (+27965), chr1:8802045-8802598 (+75377), chr1:8730227-8730579 (+147296), chr1:8472462-8472973 (+404981), chr1:8451052-8451588 (+426379), chr1:8403461-8404176 (+473880)	6
RIPK4	chr21:43203546-43204039 (-16544), chr21:43101264-43101903 (+85665), chr21:43098467-43099076 (+88477), chr21:43076970-43077677 (+109925), chr21:43073901-43074635 (+112981), chr21:42955018-42955610 (+231935)	6
OPHN1	chrX:67682024-67682798 (-29112), chrX:67583733-67584207 (+69329), chrX:67009371-67009756 (+643735), chrX:66919909-66920925 (+732882)	5
SMS	chrX:21932572-21933085 (-25886), chrX:21991381-21991883 (+32917), chrX:21991933-21992574 (+33539), chrX:22014379-22014701 (+55825)	5
GRIA3	chrX:121320699-121321482 (-997005), chrX:121407147-121407645 (-910700), chrX:121497058-121498024 (-820555), chrX:122854330-122854694 (+536416)	5
GREM2	chr1:240850945-240851744 (-75883), chr1:240767971-240768481 (+7236), chr1:240639010-240639760 (+136077), chr1:240638714-240638960 (+136625), chr1:240599040-240600034 (+175925)	5
GLUD1	chr10:89248401-89249028 (-393939), chr10:89008529-89009078 (-154028), chr10:88964156-88965000 (-109802), chr10:88767999-88768636 (+86458), chr10:88767021-88767930 (+87300)	5
BMP7	chr20:55363209-55363956 (+478124), chr20:55362516-55363120 (+478889), chr20:55333217-55334458 (+507869), chr20:55309783-55310934 (+531348), chr20:55244002-55244486 (+597463)	5
ASAP1	chr8:131495142-131496059 (-39695), chr8:131181500-131181919 (+274196), chr8:131033951-131034593 (+421634), chr8:131008675-131009500 (+446818), chr8:130997541-130998199 (+458036)	5
ATP8A2	chr13:26174039-26174596 (+228109), chr13:26193874-26194604 (+248030), chr13:26223034-26223543 (+277080), chr13:26233061-26233732 (+287188), chr13:26303207-26303983 (+357386)	5
ATXN1	chr6:17159361-17159947 (-397933), chr6:17115962-17116429 (-354475), chr6:17034895-17035938 (-273696), chr6:17012626-17013459 (-251322), chr6:16406738-16407419 (+354642)	5
RREB1	chr6:6725280-6725635 (-382628), chr6:6758912-6759835 (-348712), chr6:7062492-7063229 (-45225), chr6:7198171-7198956 (+90478), chr6:7206360-7206924 (+98556)	5
RUNX1-IT1	chr21:36110373-36110941 (+301066), chr21:36108646-36110056 (+302372), chr21:36106761-36107715 (+304485), chr21:36102379-36103873 (+308597), chr21:36100290-36101580 (+310788)	5
C14orf43	chr14:74304847-74305295 (-51175), chr14:74252067-74252996 (+1364), chr14:74251147-74252012 (+2316), chr14:74230033-74230656 (+23551), chr14:74223021-74223952 (+30409)	5
BTBD9	chr6:38428277-38428348 (+179611), chr6:38411357-38412024 (+196233), chr6:38207593-38208389 (+399933), chr6:38117971-38118850 (+489513), chr6:38047360-38047733 (+560377)	5
C11orf58	chr11:16915040-16915577 (+155161), chr11:17003327-17003952 (+243492), chr11:17007997-17008592 (+248147), chr11:17008608-17009201 (+248757), chr11:17010860-17011441 (+251003)	5
SCYL1	chr11:65184298-65184932 (-107933), chr11:65185960-65186883 (-106126), chr11:65187387-65187923 (-104893), chr11:65188484-65189098 (-103757), chr11:65239540-65240112 (-52722)	5
SCAF11	chr12:46652751-46653325 (-268637), chr12:46594938-46595886 (-211011), chr12:46573194-46574039 (-189216), chr12:46527449-46528435 (-143541), chr12:46519781-46520561 (-135770)	5
RYBP	chr3:72799510-72799895 (-303929), chr3:72795553-72796609 (-300307), chr3:72772038-72772514 (-276502), chr3:72170377-72170956 (+325107), chr3:71922141-71922624 (+573391)	5
SH3RF3	chr2:110024070-110024670 (+278373), chr2:110086738-110087520 (+341132), chr2:110088852-110088920 (+342889), chr2:110096962-110098130 (+351549), chr2:110312852-110313354 (+567106)	5
SHISA2	chr13:26303207-26303983 (+321603), chr13:26233061-26233732 (+391801), chr13:26223034-26223543 (+401909), chr13:26193874-26194604 (+430959), chr13:26174039-26174596 (+450880)	5
SIPA1L3	chr19:38422875-38423510 (+25325), chr19:38457429-38457655 (+59674), chr19:38460253-38460815 (+62666), chr19:38472693-38473125 (+75041), chr19:38537857-38538350 (+140236)	5
TMPRSS2	chr21:43101264-43101903 (-221592), chr21:43098467-43099076 (-218780), chr21:43076970-43077677 (-197332), chr21:43073901-43074635 (-194276), chr21:42955018-42955610 (-75322)	5
TNS4	chr17:38711534-38712284 (-54055), chr17:38708631-38709230 (-51077), chr17:38707951-38708503 (-50373), chr17:38707876-38707933 (-50051), chr17:38705216-38706129 (-47819)	5
DPF1	chr19:38537857-38538350 (+176786), chr19:38472693-38473125 (+241981), chr19:38460253-38460815 (+254356), chr19:38457429-38457655 (+257348), chr19:38422875-38423510 (+291697)	5
MAML3	chr4:141226137-141226749 (-151210), chr4:140959180-140959713 (+115786), chr4:140958427-140959074 (+116482), chr4:140941059-140941495 (+133956), chr4:140940342-140940833 (+134645)	5
LRIG1	chr3:66644311-66644819 (-93720), chr3:66527497-66528057 (+23068), chr3:66525724-66526382 (+24792), chr3:66467733-66467947 (+83005), chr3:66466278-66467359 (+84026)	5
LRRC49	chr15:71363108-71364428 (+178840), chr15:71385551-71386689 (+201192), chr15:71388739-71389722 (+204303), chr15:71390040-71390765 (+205475), chr15:71406261-71407941 (+222173)	5
LRRC3B	chr3:27356051-27356913 (+692182), chr3:27358470-27359121 (+694496), chr3:27365984-27366726 (+702055), chr3:27386830-27387527 (+722879), chr3:27395574-27396126 (+731550)	5
FRMD8	chr11:65184298-65184932 (+30574), chr11:65185960-65186883 (+32381), chr11:65187387-65187923 (+33614), chr11:65188484-65189098 (+34750), chr11:65239540-65240112 (+85785)	5
MINPP1	chr10:88964156-88965000 (-299645), chr10:89008529-89009078 (-255419), chr10:89248401-89249028 (-15508), chr10:89348884-89349908 (+85173), chr10:89407818-89408163 (+143768)	5
MBL2	chr10:54203013-54204048 (+327929), chr10:54168887-54169449 (+362292), chr10:54115540-54116056 (+415662), chr10:54113717-54114281 (+417461), chr10:54108803-54109272 (+422422)	5
PSD2	chr5:139040291-139040362 (-135079), chr5:139040435-139040911 (-134733), chr5:139057014-139057387 (-118205), chr5:139088397-139088786 (-86814), chr5:139088828-139089214 (-86385)	5
PMFBP1	chr16:73030445-73031470 (-824894), chr16:73023892-73024612 (-818188), chr16:72969902-72970368 (-764071), chr16:72963166-72963712 (-757375), chr16:72870082-72870453 (-664204)	5
PLEKHA7	chr11:17010860-17011441 (+24812), chr11:17008608-17009201 (+27058), chr11:17007997-17008592 (+27668), chr11:17003327-17003952 (+32323), chr11:16915040-16915577 (+120654)	5
PPIF	chr10:80853383-80854269 (-253394), chr10:80886642-80887308 (-220245), chr10:80887994-80889147 (-218649), chr10:80916436-80918955 (-189524), chr10:81101807-81102930 (-4851)	5
CYP2B7P1	chr19:41402609-41402933 (-27399), chr19:41402940-41403647 (-26876), chr19:41403718-41404400 (-26111), chr19:41426251-41427998 (-3045), chr19:41468236-41469010 (+38453)	5
CXXC5	chr5:139040291-139040362 (+12026), chr5:139040435-139040911 (+12372), chr5:139057014-139057387 (+28900), chr5:139088397-139088786 (+60291), chr5:139088828-139089214 (+60720)	5
DDR1	chr6:30719039-30719936 (-136977), chr6:30719964-30720660 (-136153), chr6:30766879-30767453 (-89299), chr6:30790255-30790974 (-65850), chr6:30850956-30851306 (-5334)	5
SMU1	chr9:33163547-33163923 (-87021), chr9:33162613-33163377 (-86281), chr9:33157145-33157617 (-80667), chr9:33106743-33107324 (-30320), chr9:33081776-33081779 (-5064)	5
SOX2	chr3:181664957-181665899 (+235716), chr3:181989399-181989669 (+559822), chr3:182002463-182003279 (+573159), chr3:182403710-182404483 (+974385), chr3:182426142-182427405 (+997062)	5
SPEF2	chr5:35304757-35306153 (-312534), chr5:35350899-35351605 (-266737), chr5:35442983-35443595 (-174700), chr5:35468783-35469342 (-148926), chr5:35476585-35477999 (-140697)	5
SLC38A1	chr12:46652751-46653325 (+10170), chr12:46594938-46595886 (+67796), chr12:46573194-46574039 (+89591), chr12:46527449-46528435 (+135266), chr12:46519781-46520561 (+143037)	5
SLC30A5	chr5:67730951-67731245 (-658678), chr5:67830071-67830699 (-559391), chr5:67831219-67831656 (-558338), chr5:67841350-67841897 (-548152), chr5:67841922-67842438 (-547596)	5
SLC40A1	chr2:190405672-190407286 (+39058), chr2:190351678-190353030 (+93183), chr2:190350664-190351493 (+94458), chr2:190350302-190350309 (+95231), chr2:190346689-190347118 (+98633)	5
CCNL1	chr3:156883987-156884700 (-5862), chr3:156852425-156852843 (+25848), chr3:156661159-156661687 (+217059), chr3:156644282-156644783 (+233949), chr3:156534575-156535726 (+343331)	5
C8orf38	chr8:96078882-96080017 (+42236), chr8:96112802-96113696 (+76035), chr8:96123179-96124064 (+86408), chr8:96124608-96125496 (+87838), chr8:96125621-96126194 (+88694)	5
CA12	chr15:63695754-63696162 (-21883), chr15:63688512-63689206 (-14784), chr15:63679494-63681197 (-6271), chr15:63672577-63673027 (+1273), chr15:63671519-63672522 (+2054)	5
C17orf79	chr17:30137941-30138363 (+48174), chr17:29981875-29982563 (+204107), chr17:29907956-29908619 (+278038), chr17:29900714-29901405 (+285266), chr17:29893340-29894233 (+292539)	5
ST3GAL1	chr8:134634027-134634766 (-50214), chr8:134632993-134633722 (-49175), chr8:134632228-134632789 (-48326), chr8:134372222-134373049 (+211547), chr8:134368386-134368935 (+215522)	5
SPRED2	chr2:66354511-66354618 (-694909), chr2:66146005-66146417 (-486555), chr2:65537699-65538100 (+121756), chr2:65536677-65537272 (+122681), chr2:65527187-65527900 (+132112)	5
WWC1	chr5:167710028-167710595 (-8753), chr5:167761774-167762295 (+42970), chr5:167778786-167779347 (+60002), chr5:167780123-167781102 (+61548), chr5:167791780-167793012 (+73331)	5
WBSCR17	chr7:69763719-69764762 (-833548), chr7:70044162-70044779 (-553318), chr7:70177920-70178384 (-419637), chr7:70184896-70185949 (-412366), chr7:71545134-71545908 (+947732)	5
WDR75	chr2:190346689-190347118 (+40745), chr2:190350302-190350309 (+44147), chr2:190350664-190351493 (+44920), chr2:190351678-190353030 (+46195), chr2:190405672-190407286 (+100320)	5
ZFHX3	chr16:73030445-73031470 (+51316), chr16:73023892-73024612 (+58022), chr16:72969902-72970368 (+112139), chr16:72963166-72963712 (+118835), chr16:72870082-72870453 (+212006)	5
ZFAND3	chr6:38047360-38047733 (+260240), chr6:38117971-38118850 (+331104), chr6:38207593-38208389 (+420684), chr6:38411357-38412024 (+624384), chr6:38428277-38428348 (+641006)	5
ZMYND11	chr10:141565-142125 (-84089), chr10:193489-194405 (-31987), chr10:198750-200042 (-26538), chr10:500722-501253 (+275054), chr10:592751-593296 (+367090)	5
MYB	chr6:135532221-135533005 (+30160), chr6:135533416-135534073 (+31292), chr6:135572465-135573120 (+70340), chr6:135591824-135592176 (+89547), chr6:135592178-135592662 (+89967)	5
MSX2	chr5:173909428-173910039 (-241841), chr5:173910295-173910930 (-240962), chr5:174136253-174136725 (-15086), chr5:174204058-174204543 (+52726), chr5:174345181-174345644 (+193838)	5
ACTL7B	chr9:111472202-111473113 (+145617), chr9:111330108-111330872 (+287785), chr9:111240740-111241833 (+376988), chr9:111239686-111240114 (+378375), chr9:110893135-110893812 (+724801)	5
AGXT2	chr5:35213650-35214813 (-165992), chr5:35210137-35210755 (-162206), chr5:35205251-35206241 (-157506), chr5:35201935-35202745 (-154100), chr5:35201120-35201919 (-153280)	5
AHI1	chr6:135592178-135592662 (+226483), chr6:135591824-135592176 (+226903), chr6:135572465-135573120 (+246110), chr6:135533416-135534073 (+285158), chr6:135532221-135533005 (+286290)	5
IMPDH1	chr7:128088713-128089273 (-38957), chr7:128083788-128085189 (-34453), chr7:128081573-128082163 (-31832), chr7:128074541-128075791 (-25130), chr7:128071261-128071848 (-21519)	5
C1GALT1	chr7:7154157-7154852 (-67741), chr7:7361018-7361966 (+139246), chr7:7394124-7395096 (+172364), chr7:7435070-7435893 (+213236), chr7:7458779-7459463 (+236875)	5
IER3	chr6:30850956-30851306 (-138804), chr6:30790255-30790974 (-78288), chr6:30766879-30767453 (-54839), chr6:30719964-30720660 (-7985), chr6:30719039-30719936 (-7161)	5
HIVEP3	chr1:42344179-42344442 (+40185), chr1:42333728-42334501 (+50381), chr1:42331722-42332505 (+52382), chr1:42325669-42326893 (+58215), chr1:42268657-42268778 (+115778)	5
HMGCS2	chr1:120332975-120333919 (-21892), chr1:120329015-120329457 (-17681), chr1:120325910-120326041 (-14421), chr1:120324986-120325553 (-13715), chr1:120287609-120288342 (+23579)	5
HNRNPA3P1	chr10:44749336-44749846 (-463726), chr10:44740322-44740889 (-454741), chr10:44668590-44669760 (-383310), chr10:44349467-44350104 (-63921), chr10:44273502-44274584 (+11822)	5
NDST1	chr5:149878202-149879409 (-8868), chr5:149880282-149881002 (-7032), chr5:149881680-149882317 (-5675), chr5:149889822-149890483 (+2479), chr5:149891581-149892430 (+4332)	5
NEK10	chr3:27395574-27396126 (+15062), chr3:27386830-27387527 (+23733), chr3:27365984-27366726 (+44557), chr3:27358470-27359121 (+52116), chr3:27356051-27356913 (+54430)	5
NCAM2	chr21:22401255-22402060 (+31025), chr21:22402496-22403066 (+32148), chr21:23269432-23270379 (+899273), chr21:23294111-23294867 (+923856), chr21:23340946-23341549 (+970615)	5
NOTCH2	chr1:120604000-120605378 (+7628), chr1:120587240-120588006 (+24694), chr1:120573997-120575461 (+37588), chr1:120539547-120540061 (+72513), chr1:120511225-120511624 (+100892)	5
HDDC2	chr6:125906431-125906700 (-283284), chr6:125905681-125906300 (-282709), chr6:125522968-125523793 (+99901), chr6:125519340-125519575 (+103824), chr6:125475868-125476466 (+147115)	5
H3F3C	chr12:32187105-32187402 (-242079), chr12:31973684-31974348 (-28841), chr12:31932615-31933281 (+12227), chr12:31902001-31902710 (+42819), chr12:31877736-31878471 (+67071)	5
HILPDA	chr7:128071261-128071848 (-24329), chr7:128074541-128075791 (-20718), chr7:128081573-128082163 (-14016), chr7:128083788-128085189 (-11395), chr7:128088713-128089273 (-6891)	5
GTF2E2	chr8:30580312-30581007 (-64922), chr8:30388845-30389907 (+126362), chr8:30283919-30284338 (+231609), chr8:30253094-30253699 (+262341), chr8:30248616-30249101 (+266879)	5
OFCC1	chr6:10341899-10342405 (-402570), chr6:10315184-10315920 (-375970), chr6:10310816-10311449 (-371551), chr6:10193522-10193963 (-254161), chr6:10163308-10164335 (-224240)	5
PDIA6	chr2:11036156-11036747 (-83492), chr2:11035287-11035834 (-82601), chr2:10925112-10925530 (+27639), chr2:10913787-10914535 (+38799), chr2:10897600-10897995 (+55162)	5
PDCD4	chr10:112549320-112550186 (-81800), chr10:112550223-112551371 (-80756), chr10:112581883-112583680 (-48771), chr10:112597100-112597558 (-34224), chr10:112645689-112646248 (+14416)	5
PDGFB	chr22:39680219-39680595 (-39450), chr22:39679511-39680123 (-38860), chr22:39648024-39648419 (-7265), chr22:39572923-39572946 (+68022), chr22:39572067-39572645 (+68601)	5
NTSR2	chr2:11703512-11703924 (+106611), chr2:11682446-11683113 (+127549), chr2:11680558-11681089 (+129505), chr2:11679414-11680424 (+130410), chr2:11675843-11676195 (+134310)	5
NR3C1	chr5:143077993-143078470 (-294187), chr5:142974346-142975338 (-190797), chr5:142940646-142941200 (-156878), chr5:142577390-142577893 (+206403), chr5:142562298-142563190 (+221301)	5
NT5C1B-RDH14	chr2:19340360-19341230 (-569949), chr2:19302308-19303109 (-531863), chr2:19272675-19273192 (-502088), chr2:19005697-19006149 (-235077), chr2:18981528-18982209 (-211023)	5
USP25	chr21:16580170-16580739 (-522041), chr21:16582269-16583199 (-519762), chr21:16583753-16584375 (-518432), chr21:16714855-16715831 (-387153), chr21:17161172-17161890 (+59035)	5
CHRNA9	chr4:40202302-40202914 (-134861), chr4:40365345-40366159 (+28283), chr4:40550340-40550714 (+213058), chr4:40552981-40553485 (+215764), chr4:40589578-40590321 (+252481)	5
PEX14	chr1:10576241-10577022 (+41629), chr1:10588380-10589596 (+53985), chr1:10589841-10589982 (+54909), chr1:10656988-10657275 (+122129), chr1:10805990-10806479 (+271232)	5
COQ3	chr6:99635212-99635345 (+206803), chr6:99634133-99634977 (+207527), chr6:99633881-99633948 (+208167), chr6:99633286-99633662 (+208608), chr6:99632541-99633118 (+209252)	5
CLIC6	chr21:36100290-36101580 (+59247), chr21:36102379-36103873 (+61438), chr21:36106761-36107715 (+65550), chr21:36108646-36110056 (+67663), chr21:36110373-36110941 (+68969)	5
CLMN	chr14:95805513-95807365 (-20194), chr14:95775659-95776098 (+10366), chr14:95731550-95732479 (+54230), chr14:95707406-95708397 (+78343), chr14:95678815-95679350 (+107162)	5
CMTM6	chr3:32502417-32503003 (+41693), chr3:32479888-32480669 (+64124), chr3:32463420-32464153 (+80616), chr3:32461610-32462276 (+82460), chr3:32439582-32440137 (+104543)	5
CMTM7	chr3:32439582-32440137 (+6697), chr3:32461610-32462276 (+28780), chr3:32463420-32464153 (+30624), chr3:32479888-32480669 (+47116), chr3:32502417-32503003 (+69547)	5
CNO	chr4:6697347-6697902 (-20217), chr4:6748380-6749874 (+31285), chr4:6751138-6751680 (+33567), chr4:6752568-6753208 (+35046), chr4:6753337-6753724 (+35689)	5
KCNF1	chr2:11035287-11035834 (-16502), chr2:11036156-11036747 (-15611), chr2:11261555-11262092 (+209761), chr2:11262243-11263057 (+210587), chr2:11263088-11263279 (+211121)	5
JAK1	chr1:65366584-65366972 (+65409), chr1:65364156-65364683 (+67767), chr1:65363751-65364139 (+68242), chr1:65344467-65345398 (+87254), chr1:65338069-65338490 (+93907)	5
JPH2	chr20:42930692-42931676 (-114966), chr20:42915766-42916601 (-99966), chr20:42794310-42795415 (+21355), chr20:42771130-42771799 (+44753), chr20:42770759-42770986 (+45345)	5
KIAA0232	chr4:6748380-6749874 (-35332), chr4:6751138-6751680 (-33050), chr4:6752568-6753208 (-31571), chr4:6753337-6753724 (-30928), chr4:6781918-6782420 (-2290)	5
CTSD	chr11:1849794-1850757 (-65054), chr11:1849320-1849789 (-64333), chr11:1848377-1848973 (-63453), chr11:1817287-1818429 (-32636), chr11:1793702-1794193 (-8726)	5
TIPARP	chr3:156391631-156392291 (-2492), chr3:156534575-156535726 (+140698), chr3:156644282-156644783 (+250080), chr3:156661159-156661687 (+266970), chr3:156852425-156852843 (+458181)	5
TMCC1	chr3:129631555-129632076 (-32414), chr3:129627091-129627708 (-27998), chr3:129392505-129393326 (+206486), chr3:129383540-129383872 (+215696), chr3:129381632-129382515 (+217328)	5
TFAP2C	chr20:55244002-55244486 (+39886), chr20:55309783-55310934 (+106001), chr20:55333217-55334458 (+129480), chr20:55362516-55363120 (+158460), chr20:55363209-55363956 (+159225)	5
TFAP2A	chr6:10341899-10342405 (+73318), chr6:10315184-10315920 (+99918), chr6:10310816-10311449 (+104337), chr6:10193522-10193963 (+221727), chr6:10163308-10164335 (+251648)	5
KITLG	chr12:89229419-89230407 (-255663), chr12:89195485-89196058 (-221522), chr12:89151536-89152453 (-177745), chr12:89144271-89145234 (-170503), chr12:89078000-89078913 (-104207)	5
LCMT1	chr16:25048970-25049326 (-73899), chr16:25051541-25052372 (-71090), chr16:25060945-25061394 (-61877), chr16:25129927-25130326 (+7080), chr16:25130369-25131410 (+7843)	5
SYPL1	chr7:105857622-105858135 (-104822), chr7:105857095-105857300 (-104141), chr7:105792558-105793220 (-39832), chr7:105710248-105710307 (+42779), chr7:105709227-105710119 (+43384)	5
LEPREL1	chr3:190024979-190025602 (-186383), chr3:189841776-189842213 (-3087), chr3:189662598-189663122 (+176048), chr3:189551766-189552225 (+286912), chr3:189474320-189474884 (+364306)	5
RALGAPA2	chr20:20739707-20740797 (-46986), chr20:20554389-20554856 (+138643), chr20:20551904-20552552 (+141038), chr20:20529241-20529898 (+163696), chr20:20434939-20435451 (+258071)	5
RAVER2	chr1:65338069-65338490 (+127502), chr1:65344467-65345398 (+134155), chr1:65363751-65364139 (+153167), chr1:65364156-65364683 (+153642), chr1:65366584-65366972 (+156000)	5
PTPN3	chr9:112318903-112319516 (-58617), chr9:112318112-112318833 (-57880), chr9:112207175-112207733 (+53139), chr9:112093566-112094107 (+166756), chr9:112092062-112092605 (+168259)	5
RAB11FIP4	chr17:29893340-29894233 (+175145), chr17:29900714-29901405 (+182418), chr17:29907956-29908619 (+189646), chr17:29981875-29982563 (+263577), chr17:30137941-30138363 (+419510)	5
FASN	chr17:80110478-80110799 (-54533), chr17:80071676-80072353 (-15909), chr17:80061688-80062414 (-5945), chr17:80058932-80059539 (-3130), chr17:80058283-80058645 (-2358)	5
FBXL4	chr6:99635212-99635345 (-239430), chr6:99634133-99634977 (-238706), chr6:99633881-99633948 (-238066), chr6:99633286-99633662 (-237625), chr6:99632541-99633118 (-236981)	5
FAM174B	chr15:93412400-93413603 (-213971), chr15:93410463-93410944 (-211673), chr15:93348743-93348858 (-149770), chr15:93289034-93289699 (-90336), chr15:93187352-93189293 (+10708)	5
FAM198B	chr4:159098570-159098826 (-4496), chr4:159097823-159098448 (-3934), chr4:159097600-159097724 (-3460), chr4:158284161-158285011 (+809616), chr4:158236438-158236818 (+857574)	5
FAM58BP	chr1:200083487-200084194 (-98815), chr1:200265120-200265893 (+82851), chr1:200306234-200306746 (+123834), chr1:200340981-200341697 (+158683), chr1:200341824-200342404 (+159458)	5
RNF144B	chr6:18386349-18387128 (-842), chr6:18424493-18424817 (+37074), chr6:18425373-18425879 (+38045), chr6:18457179-18457687 (+69852), chr6:18493543-18494605 (+106493)	5
RNF11	chr1:51772533-51773163 (+70903), chr1:51786854-51787612 (+85288), chr1:51789825-51790442 (+88189), chr1:51794849-51795543 (+93251)	4
RNLS	chr10:90300839-90301815 (+41755), chr10:90283518-90284015 (+59315), chr10:90199503-90200826 (+142917), chr10:89912329-89913017 (+430409)	4
RGS12	chr4:3112953-3113824 (-202485), chr4:3113897-3114441 (-201705), chr4:3124869-3125656 (-190611), chr4:3365940-3366322 (+50257)	4
RHOH	chr4:40191591-40192200 (-6631), chr4:40192365-40192830 (-5929), chr4:40193131-40193548 (-5187), chr4:40202302-40202914 (+4081)	4
FAM3D	chr3:59650148-59650575 (-997801), chr3:59649282-59649930 (-997045), chr3:58843712-58844283 (-191437), chr3:58843287-58843632 (-190899)	4
FAT1	chr4:188421081-188421605 (-776356), chr4:188275665-188276505 (-631098), chr4:188157440-188158465 (-512966), chr4:188156675-188157221 (-511961)	4
FAT3	chr11:91214846-91215483 (-870097), chr11:91216676-91217928 (-867960), chr11:91440845-91441519 (-644080), chr11:91872979-91873861 (-211842)	4
F8	chrX:154255016-154255134 (-4077), chrX:154216996-154217097 (+33951), chrX:154216154-154216888 (+34477)	4
EYA2	chr20:45768359-45768959 (+245396), chr20:45947102-45948144 (+424360), chr20:45948455-45948991 (+425460), chr20:45973921-45974445 (+450920)	4
ESM1	chr5:54117598-54118413 (+163408), chr5:53951900-53952491 (+329218), chr5:53880500-53880955 (+400686), chr5:53829636-53830037 (+451577)	4
FAM134B	chr5:16787258-16787830 (-170377), chr5:16749617-16750233 (-132758), chr5:16744402-16745263 (-127666), chr5:16508938-16509834 (+107781)	4
EPHA8	chr1:22781003-22781525 (-108740), chr1:22795755-22796405 (-93924), chr1:22798908-22799987 (-90556), chr1:22813520-22814133 (-76177)	4
ENPP6	chr4:185305054-185305578 (-166202), chr4:185252364-185253184 (-113660), chr4:185250414-185251008 (-111597), chr4:185208856-185209441 (-70035)	4
ELF1	chr13:41591324-41591683 (+2004), chr13:41495946-41496350 (+97360), chr13:41469668-41470401 (+123473), chr13:41375635-41376019 (+217681)	4
ELOVL5	chr6:53333842-53334351 (-120120), chr6:53330418-53331016 (-116740), chr6:53329258-53330295 (-115800), chr6:53039644-53040152 (+174079)	4
EML1	chr14:100477923-100478871 (+218652), chr14:100491432-100492067 (+232005), chr14:100497764-100498814 (+238544), chr14:100525754-100526239 (+266252)	4
RAB11FIP2	chr10:120116048-120116696 (-310258), chr10:120045192-120045827 (-239396), chr10:120002838-120003054 (-196832), chr10:119876326-119876937 (-70518)	4
FGF12	chr3:192625537-192626303 (-499082), chr3:192624633-192625394 (-498176), chr3:192315205-192316802 (-189166), chr3:192314451-192314849 (-187812)	4
FJX1	chr11:35575292-35575992 (-64093), chr11:35589080-35590056 (-50167), chr11:35642598-35643585 (+3357), chr11:35643612-35643794 (+3968)	4
RARS	chr5:167761774-167762295 (-151428), chr5:167778786-167779347 (-134396), chr5:167780123-167781102 (-132850), chr5:167791780-167793012 (-121067)	4
RASA2	chr3:141073910-141074372 (-131785), chr3:141084800-141085699 (-120676), chr3:141086906-141087559 (-118693), chr3:141087787-141088313 (-117876)	4
RBBP7	chrX:16900040-16900588 (-12336), chrX:16889421-16890040 (-1753), chrX:16879824-16880171 (+7980)	4
RBM20	chr10:112549320-112550186 (+145598), chr10:112550223-112551371 (+146642), chr10:112581883-112583680 (+178627), chr10:112597100-112597558 (+193174)	4
RBM24	chr6:17012626-17013459 (-268766), chr6:17034895-17035938 (-246392), chr6:17115962-17116429 (-165613), chr6:17159361-17159947 (-122155)	4
REG4	chr1:120332975-120333919 (+20756), chr1:120329015-120329457 (+24967), chr1:120325910-120326041 (+28227), chr1:120324986-120325553 (+28933)	4
RBM47	chr4:40589578-40590321 (+41933), chr4:40552981-40553485 (+78650), chr4:40550340-40550714 (+81356), chr4:40365345-40366159 (+266131)	4
RBPMS	chr8:30248616-30249101 (+6915), chr8:30253094-30253699 (+11453), chr8:30283919-30284338 (+42185), chr8:30388845-30389907 (+147432)	4
RAB20	chr13:111252596-111253266 (-38860), chr13:111242528-111243394 (-28890), chr13:111199202-111199699 (+14620), chr13:111100550-111101349 (+113121)	4
SUPT3H	chr6:45576608-45576734 (-231001), chr6:45523547-45524349 (-178278), chr6:45522192-45523134 (-176993), chr6:45503531-45504023 (-158107)	4
STK17A	chr7:43675588-43676356 (+53280), chr7:43677844-43677900 (+55180), chr7:43714114-43714592 (+91661), chr7:43721718-43722594 (+99464)	4
LDLRAD3	chr11:36033836-36034484 (+68548), chr11:36037938-36038745 (+72730), chr11:36056124-36057340 (+91120), chr11:36167533-36168476 (+202393)	4
LDLRAP1	chr1:25785178-25785652 (-84661), chr1:25802524-25803578 (-67025), chr1:25893187-25893677 (+23356), chr1:25894554-25895019 (+24711)	4
KIF4B	chr5:154447770-154449351 (+55301), chr5:154449724-154450819 (+57012), chr5:154470550-154471392 (+77711), chr5:154495841-154497009 (+103165)	4
KIRREL3	chr11:126256218-126257125 (+614094), chr11:126251734-126253363 (+618217), chr11:126238348-126239110 (+632037), chr11:126235109-126236054 (+635184)	4
KLLN	chr10:90300839-90301815 (-678133), chr10:90283518-90284015 (-660573), chr10:90199503-90200826 (-576971), chr10:89912329-89913017 (-289479)	4
TACR2	chr10:71181472-71182170 (-5147), chr10:71145673-71146169 (+30753), chr10:71120373-71120931 (+56022), chr10:71092498-71093457 (+83696)	4
TADA2B	chr4:6918296-6918727 (-126644), chr4:6919303-6919866 (-125571), chr4:6958814-6959333 (-86082), chr4:7047319-7048050 (+2529)	4
TARBP1	chr1:234740552-234741164 (-126009), chr1:234739509-234740037 (-124924), chr1:234737019-234737770 (-122546), chr1:234700049-234700910 (-85631)	4
TBCK	chr4:106984266-106984408 (+253086), chr4:106983363-106984200 (+253641), chr4:106983048-106983194 (+254302), chr4:106915175-106915634 (+322018)	4
TLN2	chr15:62748884-62749267 (-190434), chr15:62765126-62765511 (-174191), chr15:63124146-63125087 (+185107), chr15:63311790-63312291 (+372531)	4
TLE1	chr9:84303377-84303726 (+44), chr9:84300667-84301591 (+2467), chr9:84240095-84240637 (+63230), chr9:84202508-84203564 (+100560)	4
CTBP2	chr10:127334799-127335489 (-618691), chr10:127313186-127314948 (-597614), chr10:126712849-126713357 (+3350), chr10:126697196-126697682 (+19014)	4
CTNND1	chr11:57545819-57546338 (+16845), chr11:57548907-57549497 (+19968), chr11:57566717-57567137 (+37693), chr11:57567871-57568542 (+38973)	4
ITPKB	chr1:226889996-226891069 (+36343), chr1:226886704-226887312 (+39868), chr1:226885542-226886084 (+41063), chr1:226826225-226826722 (+100402)	4
IRX5	chr16:54459229-54460680 (-505156), chr16:54464225-54464698 (-500649), chr16:54574620-54575389 (-390106), chr16:54679337-54679716 (-285584)	4
KIAA1245	chr1:146039749-146040890 (-293870), chr1:146233243-146234363 (-100387), chr1:146418439-146419473 (+84766), chr1:146585530-146587062 (+252106)	4
COBL	chr7:51424541-51425298 (-40405), chr7:51417818-51418637 (-33713), chr7:51247607-51248492 (+136465), chr7:50838016-50839589 (+545712)	4
CLIC5	chr6:45576608-45576734 (+471414), chr6:45523547-45524349 (+524137), chr6:45522192-45523134 (+525422), chr6:45503531-45504023 (+544308)	4
CLEC2L	chr7:139364266-139365136 (+156027), chr7:139430807-139431346 (+222403), chr7:139431797-139432114 (+223282), chr7:139470732-139471317 (+262351)	4
CPS1	chr2:212219136-212219604 (+798047), chr2:212236455-212236933 (+815371), chr2:212258275-212259132 (+837381), chr2:212261382-212262129 (+840433)	4
COL28A1	chr7:7458779-7459463 (+116339), chr7:7435070-7435893 (+139978), chr7:7394124-7395096 (+180850), chr7:7361018-7361966 (+213968)	4
CENPN	chr16:80870714-80871295 (-169098), chr16:80871322-80872424 (-168230), chr16:80885514-80885896 (-154398), chr16:80933983-80934739 (-105742)	4
CEBPB	chr20:49011755-49012335 (+204925), chr20:49029608-49029982 (+222675), chr20:49031248-49032105 (+224557), chr20:49067530-49068431 (+260861)	4
CLDN23	chr8:8318740-8319680 (-240456), chr8:8319774-8319881 (-239838), chr8:8336450-8337001 (-222940), chr8:8513290-8513740 (-46151)	4
CHD2	chr15:93289034-93289699 (-154184), chr15:93348743-93348858 (-94750), chr15:93410463-93410944 (-32847), chr15:93412400-93413603 (-30549)	4
TXN	chr9:112969186-112969951 (+49351), chr9:112951221-112951824 (+67397), chr9:112913583-112914379 (+104939), chr9:112851828-112852748 (+166632)	4
UQCR10	chr22:30190865-30191303 (+27726), chr22:30194515-30195710 (+31755), chr22:30210013-30210473 (+46885), chr22:30212699-30213098 (+49541)	4
UBE3A	chr15:26106214-26106499 (-422182), chr15:26105380-26106170 (-421600), chr15:26094258-26094828 (-410368), chr15:26093531-26094018 (-409600)	4
USP10	chr16:84757932-84758734 (+24778), chr16:84759009-84760034 (+25967), chr16:84764005-84764587 (+30741), chr16:84780572-84781009 (+47236)	4
NR2E3	chr15:71580438-71581230 (-522060), chr15:71586479-71588292 (-515508), chr15:71984106-71984567 (-118557), chr15:71984637-71985112 (-118019)	4
USP35	chr11:77970462-77971734 (+71240), chr11:78001255-78001714 (+101627), chr11:78006041-78006891 (+106608), chr11:78022805-78023467 (+123278)	4
TUBD1	chr17:57946710-57947117 (+23392), chr17:57924889-57925614 (+45054), chr17:57923544-57924602 (+46233), chr17:57922320-57923487 (+47402)	4
TTC39A	chr1:51794849-51795543 (+15589), chr1:51789825-51790442 (+20651), chr1:51786854-51787612 (+23552), chr1:51772533-51773163 (+37937)	4
PARL	chr3:183730021-183730687 (-127661), chr3:183728585-183729622 (-126411), chr3:183725618-183726514 (-123373), chr3:183562406-183564181 (+39399)	4
PBOV1	chr6:138708668-138709013 (-169214), chr6:138580167-138580587 (-40750), chr6:138552408-138553147 (-13151), chr6:138548459-138548866 (-9036)	4
ODZ3	chr4:182592228-182592754 (-652608), chr4:182622866-182623083 (-622124), chr4:182877532-182878866 (-366900), chr4:183159341-183159886 (-85485)	4
ODC1	chr2:10737982-10738480 (-149778), chr2:10630899-10631288 (-42641), chr2:10627176-10627710 (-38990), chr2:10545424-10545934 (+42774)	4
OR9Q1	chr11:57545819-57546338 (-245274), chr11:57548907-57549497 (-242151), chr11:57566717-57567137 (-224426), chr11:57567871-57568542 (-223146)	4
NPNT	chr4:106915175-106915634 (+98808), chr4:106983048-106983194 (+166524), chr4:106983363-106984200 (+167185), chr4:106984266-106984408 (+167740)	4
GSDMC	chr8:131181500-131181919 (-382576), chr8:131033951-131034593 (-235138), chr8:131008675-131009500 (-209954), chr8:130997541-130998199 (-198736)	4
HGF	chr7:81075593-81076100 (+323605), chr7:81074965-81075376 (+324281), chr7:80571205-80573263 (+827218), chr7:80570898-80571064 (+828471)	4
NNMT	chr11:114030599-114031214 (-135628), chr11:114033445-114033978 (-132823), chr11:114049841-114050429 (-116400), chr11:114186472-114187180 (+20291)	4
NCOR2	chr12:125215049-125215718 (-163374), chr12:125093455-125094043 (-41739), chr12:124866290-124866686 (+185522), chr12:124615140-124615591 (+436644)	4
HOXC13	chr12:54197870-54198901 (-134190), chr12:54218831-54219780 (-113270), chr12:54230451-54230657 (-102022), chr12:54238603-54239346 (-93601)	4
HIPK2	chr7:139470732-139471317 (+6668), chr7:139431797-139432114 (+45737), chr7:139430807-139431346 (+46616), chr7:139364266-139365136 (+112992)	4
HSPB1	chr7:75920700-75921604 (-10723), chr7:75922817-75923426 (-8753), chr7:75936017-75936901 (+4584), chr7:75939327-75940327 (+7952)	4
HRASLS	chr3:192314451-192314849 (-644268), chr3:192315205-192316802 (-642914), chr3:192624633-192625394 (-333904), chr3:192625537-192626303 (-332998)	4
HSD17B13	chr4:88042805-88043147 (+201080), chr4:88042053-88042599 (+201730), chr4:88010479-88010910 (+233361), chr4:87863409-87863996 (+380353)	4
IRS1	chr2:227267937-227268622 (+395226), chr2:227203490-227204021 (+459750), chr2:227046275-227046942 (+616897), chr2:226983774-226983906 (+679666)	4
IRF2	chr4:185305054-185305578 (+90410), chr4:185252364-185253184 (+142952), chr4:185250414-185251008 (+145015), chr4:185208856-185209441 (+186577)	4
IP6K3	chr6:33707770-33708403 (+6675), chr6:33699560-33700117 (+14923), chr6:33698892-33699437 (+15597), chr6:33698400-33698890 (+16117)	4
INPP4B	chr4:143521987-143522664 (+245278), chr4:143518268-143518716 (+249112), chr4:143516622-143517018 (+250784), chr4:143274820-143275699 (+492344)	4
IL1RAPL2	chrX:103603811-103604339 (-206921), chrX:104225416-104225833 (+414629), chrX:104395184-104395569 (+584381)	4
IKBKG	chrX:153769098-153769679 (-1070), chrX:153769842-153770202 (-437), chrX:153770768-153771054 (+452)	4
IL15	chr4:143274820-143275699 (+717511), chr4:143516622-143517018 (+959071), chr4:143518268-143518716 (+960743), chr4:143521987-143522664 (+964577)	4
AHR	chr7:16944768-16945310 (-393237), chr7:16966080-16966947 (-371762), chr7:16967584-16968099 (-370434), chr7:17315566-17316403 (-22291)	4
ADORA2A	chr22:24698480-24698938 (-124821), chr22:24699077-24700093 (-123945), chr22:24716843-24717010 (-106603), chr22:24717056-24717365 (-106319)	4
AFF1	chr4:87863409-87863996 (+7549), chr4:88010479-88010910 (+154541), chr4:88042053-88042599 (+186172), chr4:88042805-88043147 (+186822)	4
AMOTL1	chr11:94324251-94324955 (-176905), chr11:94441578-94442322 (-59558), chr11:94565558-94566866 (+64704), chr11:94578582-94579378 (+77472)	4
ACSL1	chr4:185819825-185820390 (-72893), chr4:185815336-185815391 (-68149), chr4:185814104-185814482 (-67078), chr4:185667487-185668044 (+79449)	4
ADHFE1	chr8:67436696-67438819 (+93040), chr8:67443604-67444174 (+99171), chr8:67454254-67454950 (+109884), chr8:67458342-67459433 (+114170)	4
ADNP	chr20:49440579-49441279 (+106598), chr20:49434147-49434807 (+113050), chr20:49431371-49431843 (+115920), chr20:49415069-49415649 (+132168)	4
MTHFS	chr15:80258195-80259054 (-69234), chr15:80249558-80250041 (-60409), chr15:79890930-79891467 (+298192), chr15:79755662-79756312 (+433404)	4
MTPAP	chr10:30129359-30129702 (+508736), chr10:30128616-30129227 (+509345), chr10:30100929-30101582 (+537011), chr10:30080628-30081335 (+557285)	4
MYBL1	chr8:67458342-67459433 (+66592), chr8:67454254-67454950 (+70878), chr8:67443604-67444174 (+81591), chr8:67436696-67438819 (+87722)	4
MTUS1	chr8:17694040-17694597 (-35893), chr8:17533653-17534210 (+124494), chr8:17532944-17533343 (+125282), chr8:17476318-17476881 (+181826)	4
NAALADL2	chr3:174201575-174202960 (-374843), chr3:174667260-174668040 (+90539), chr3:174673044-174674959 (+96891), chr3:174690788-174691850 (+114208)	4
NBPF10	chr1:145218715-145219739 (-74144), chr1:145233618-145234200 (-59462), chr1:145245483-145247398 (-46930), chr1:145310067-145311228 (+17277)	4
ANO1	chr11:69952104-69952964 (+28126), chr11:69962712-69963176 (+38536), chr11:70015710-70016319 (+91607), chr11:70029473-70030100 (+105379)	4
AR	chrX:66919909-66920925 (+156543), chrX:67009371-67009756 (+245690), chrX:67583733-67584207 (+820096)	4
APP	chr21:27763157-27763446 (-220164), chr21:27760828-27763135 (-218844), chr21:27539196-27539700 (+3690), chr21:27395036-27395642 (+147799)	4
AREG	chr4:75338801-75339648 (+28372), chr4:75340555-75341270 (+30060), chr4:75345934-75346662 (+35445), chr4:75586852-75587124 (+276135)	4
MRPL14	chr6:44077926-44078561 (+16947), chr6:44026135-44026814 (+68716), chr6:43878381-43878927 (+216537), chr6:43770936-43771297 (+324074)	4
ZMYND8	chr20:45973921-45974445 (+11291), chr20:45948455-45948991 (+36751), chr20:45947102-45948144 (+37851), chr20:45768359-45768959 (+216815)	4
ZIC3	chrX:137070644-137071044 (+422498), chrX:137093588-137094078 (+445487), chrX:137100282-137100687 (+452139)	4
ZNF281	chr1:200341824-200342404 (+37052), chr1:200340981-200341697 (+37827), chr1:200306234-200306746 (+72676), chr1:200265120-200265893 (+113659)	4
ZFP42	chr4:188156675-188157221 (-759977), chr4:188157440-188158465 (-758972), chr4:188275665-188276505 (-640840), chr4:188421081-188421605 (-495582)	4
ZBTB38	chr3:141073910-141074372 (+31086), chr3:141084800-141085699 (+42195), chr3:141086906-141087559 (+44178), chr3:141087787-141088313 (+44995)	4
ZBTB40	chr1:22781003-22781525 (+2920), chr1:22795755-22796405 (+17736), chr1:22798908-22799987 (+21104), chr1:22813520-22814133 (+35483)	4
PKDCC	chr2:41345676-41346201 (-929222), chr2:41369661-41370085 (-905288), chr2:41370698-41370941 (-904341), chr2:42237883-42238334 (-37052)	4
PKP4	chr2:158988547-158989087 (-324659), chr2:159045890-159046498 (-267282), chr2:159580072-159581035 (+267078), chr2:159583739-159583748 (+270268)	4
ZNF645	chrX:22135176-22136209 (-155337), chrX:22152690-22153749 (-137810), chrX:22692982-22693564 (+402243)	4
WFIKKN2	chr17:48840993-48841877 (-71170), chr17:48862231-48863873 (-49553), chr17:48869471-48869972 (-42883), chr17:48933025-48933906 (+20861)	4
VMP1	chr17:57922320-57923487 (+138041), chr17:57923544-57924602 (+139210), chr17:57924889-57925614 (+140389), chr17:57946710-57947117 (+162051)	4
VEGFA	chr6:43770936-43771297 (+33171), chr6:43878381-43878927 (+140708), chr6:44026135-44026814 (+288529), chr6:44077926-44078561 (+340298)	4
VRK2	chr2:57320016-57320604 (-953467), chr2:57366223-57366794 (-907268), chr2:57367361-57368147 (-906023), chr2:57773024-57773496 (-500517)	4
SREBF1	chr17:17790272-17790678 (-50150), chr17:17743440-17743971 (-3381), chr17:17689404-17689926 (+50660), chr17:17600449-17600999 (+139601)	4
ST3GAL4	chr11:126235109-126236054 (+10042), chr11:126238348-126239110 (+13189), chr11:126251734-126253363 (+27009), chr11:126256218-126257125 (+31132)	4
C1orf95	chr1:226826225-226826722 (+89973), chr1:226885542-226886084 (+149312), chr1:226886704-226887312 (+150507), chr1:226889996-226891069 (+154032)	4
C6orf125	chr6:33707770-33708403 (-28583), chr6:33699560-33700117 (-20335), chr6:33698892-33699437 (-19661), chr6:33698400-33698890 (-19141)	4
C7orf44	chr7:43721718-43722594 (+46927), chr7:43714114-43714592 (+54730), chr7:43677844-43677900 (+91211), chr7:43675588-43676356 (+93111)	4
CABLES1	chr18:20679581-20680044 (-35914), chr18:20839425-20840878 (+124425), chr18:20861452-20862344 (+146171), chr18:20910996-20911615 (+195579)	4
C8orf49	chr8:11570558-11571143 (-47914), chr8:11574030-11574770 (-44365), chr8:11574822-11575533 (-43587), chr8:11587984-11588724 (-30411)	4
CALCOCO1	chr12:54238603-54239346 (-117668), chr12:54230451-54230657 (-109247), chr12:54218831-54219780 (-97999), chr12:54197870-54198901 (-77079)	4
CAP1	chr1:40425948-40426322 (-80120), chr1:40446094-40446843 (-59786), chr1:40490324-40490849 (-15668), chr1:40496071-40496802 (-9818)	4
CD44	chr11:35317195-35317963 (+157162), chr11:35385473-35385926 (+225283), chr11:35411152-35412001 (+251160), chr11:35412386-35413741 (+252647)	4
CARTPT	chr5:70927016-70927540 (-87712), chr5:70927739-70928564 (-86838), chr5:71044318-71044810 (+29574), chr5:71187724-71188268 (+173006)	4
CBR1	chr21:36589681-36590420 (-852234), chr21:37325848-37326421 (-116150), chr21:37330684-37331208 (-111339), chr21:37489530-37489979 (+47470)	4
SLC39A11	chr17:70702165-70703078 (+386231), chr17:70497448-70498336 (+590961), chr17:70148509-70148954 (+940121), chr17:70147613-70148277 (+940908)	4
CDNF	chr10:14728975-14729743 (+150624), chr10:14695677-14696357 (+183966), chr10:14695085-14695658 (+184611), chr10:14613793-14614603 (+265785)	4
SLC25A15	chr13:41375635-41376019 (+12280), chr13:41469668-41470401 (+106488), chr13:41495946-41496350 (+132601), chr13:41591324-41591683 (+227957)	4
SLC25A26	chr3:66466278-66467359 (+347534), chr3:66467733-66467947 (+348555), chr3:66525724-66526382 (+406768), chr3:66527497-66528057 (+408492)	4
CDK6	chr7:92563130-92563851 (-97550), chr7:92237827-92238496 (+227779), chr7:92236033-92236730 (+229559), chr7:92235419-92235889 (+230287)	4
SPECC1L	chr22:24698480-24698938 (+31919), chr22:24699077-24700093 (+32795), chr22:24716843-24717010 (+50137), chr22:24717056-24717365 (+50421)	4
SOX9	chr17:70147613-70148277 (+30784), chr17:70148509-70148954 (+31571), chr17:70497448-70498336 (+380731), chr17:70702165-70703078 (+585461)	4
SNX18	chr5:53829636-53830037 (+16244), chr5:53880500-53880955 (+67135), chr5:53951900-53952491 (+138603), chr5:54117598-54118413 (+304413)	4
SOD3	chr4:24596608-24597126 (-200218), chr4:24597182-24597784 (-199602), chr4:24765270-24766200 (-31350), chr4:24796694-24797194 (-141)	4
SNAPC3	chr9:15373455-15373641 (-49234), chr9:15377338-15377387 (-45419), chr9:15377692-15378437 (-44717), chr9:15400287-15402161 (-21558)	4
SMARCE1	chr17:38774824-38775833 (+28774), chr17:38773765-38774741 (+29850), chr17:38762590-38763663 (+40976), chr17:38738094-38739311 (+65400)	4
DAB2	chr5:40254414-40254856 (-829300), chr5:39836445-39837068 (-411422), chr5:39716348-39717384 (-291531), chr5:39712641-39713565 (-287768)	4
CXCL12	chr10:44749336-44749846 (+130954), chr10:44740322-44740889 (+139939), chr10:44668590-44669760 (+211370), chr10:44349467-44350104 (+530759)	4
CYP4F22	chr19:15605975-15606296 (-13200), chr19:15673730-15673997 (+54528), chr19:15699105-15699530 (+79982), chr19:15705873-15706528 (+86865)	4
DIXDC1	chr11:111832182-111832751 (-15566), chr11:111853711-111854668 (+6157), chr11:111857367-111857791 (+9546), chr11:111859182-111859995 (+11556)	4
DLG2	chr11:84848270-84849117 (+489620), chr11:84536021-84536792 (+801907), chr11:84398027-84400119 (+939241), chr11:84382251-84382908 (+955734)	4
DICER1	chr14:95775659-95776098 (-167794), chr14:95731550-95732479 (-123930), chr14:95707406-95708397 (-99817), chr14:95678815-95679350 (-70998)	4
PNMA1	chr14:74252067-74252996 (-71404), chr14:74251147-74252012 (-70452), chr14:74230033-74230656 (-49217), chr14:74223021-74223952 (-42359)	4
PNOC	chr8:28004698-28005143 (-169728), chr8:28005240-28005591 (-169233), chr8:28005756-28006081 (-168730), chr8:28223106-28223612 (+48710)	4
PRR5L	chr11:36033836-36034484 (-363375), chr11:36037938-36038745 (-359193), chr11:36056124-36057340 (-340803), chr11:36167533-36168476 (-229530)	4
PRLH	chr2:238410675-238411629 (-64065), chr2:238417740-238418175 (-57259), chr2:238418357-238418744 (-56666), chr2:238467379-238468312 (-7371)	4
PRLHR	chr10:120116048-120116696 (+238788), chr10:120045192-120045827 (+309650), chr10:120002838-120003054 (+352214), chr10:119876326-119876937 (+478528)	4
PREX1	chr20:47480617-47481986 (-36882), chr20:47428484-47430010 (+15173), chr20:47314208-47315108 (+129762), chr20:46540844-46541267 (+903364)	4
PPM1K	chr4:89255810-89256685 (-50360), chr4:89241596-89242649 (-36235), chr4:89239722-89240551 (-34249), chr4:89098998-89099430 (+106674)	4
MCART1	chr9:38046470-38048082 (-142926), chr9:38024092-38024600 (-119996), chr9:38022939-38023505 (-118872), chr9:37945003-37945404 (-40854)	4
METTL20	chr12:31803890-31804200 (-8564), chr12:31877736-31878471 (+65495), chr12:31902001-31902710 (+89747), chr12:31932615-31933281 (+120339)	4
MFSD2A	chr1:40425948-40426322 (+5351), chr1:40446094-40446843 (+25685), chr1:40490324-40490849 (+69803), chr1:40496071-40496802 (+75653)	4
MGST2	chr4:140940342-140940833 (+353666), chr4:140941059-140941495 (+354355), chr4:140958427-140959074 (+371829), chr4:140959180-140959713 (+372525)	4
FRMD3	chr9:86088596-86089079 (+64510), chr9:86047023-86047555 (+106059), chr9:86046549-86046987 (+106580), chr9:85747523-85748183 (+405495)	4
FRMD4A	chr10:14728975-14729743 (-356493), chr10:14695677-14696357 (-323151), chr10:14695085-14695658 (-322506), chr10:14613793-14614603 (-241332)	4
FSCB	chr14:44247769-44248611 (+728309), chr14:44124931-44125830 (+851118), chr14:44124306-44124897 (+851897), chr14:44118575-44119603 (+857410)	4
FREM1	chr9:15287148-15287245 (-376204), chr9:15286277-15286722 (-375507), chr9:15241926-15242433 (-331187), chr9:15211106-15211536 (-300328)	4
FOXA1	chr14:38111399-38111879 (-47150), chr14:38057154-38057589 (+7117), chr14:38015530-38016913 (+48267), chr14:37905639-37906291 (+158524)	4
FOXC1	chr6:1526022-1526406 (-84467), chr6:1577895-1578196 (-32635), chr6:1641281-1642038 (+30979), chr6:1832912-1833467 (+222509)	4
FLRT3	chr20:15277059-15277558 (-958996), chr20:15042486-15043045 (-724453), chr20:14826177-14826550 (-508051), chr20:14745511-14745910 (-427398)	4
FMN1	chr15:33359475-33362203 (-754), chr15:33319913-33320543 (+39857), chr15:33314744-33315222 (+45102), chr15:33132670-33133224 (+227138)	4
FMN2	chr1:240599040-240600034 (+344352), chr1:240638714-240638960 (+383652), chr1:240639010-240639760 (+384200), chr1:240767971-240768481 (+513041)	4
MLN	chr6:33963496-33964026 (-191968), chr6:33959428-33959939 (-187891), chr6:33958560-33959020 (-186997), chr6:33796040-33796416 (-24435)	4
MLPH	chr2:238410675-238411629 (+15274), chr2:238417740-238418175 (+22080), chr2:238418357-238418744 (+22673), chr2:238467379-238468312 (+71968)	4
LRRN3	chr7:109921224-109922464 (-809218), chr7:110174599-110175240 (-556142), chr7:110398384-110398847 (-332446), chr7:110399012-110399611 (-331750)	4
LRRTM2	chr5:138483921-138484525 (-273166), chr5:138483216-138483867 (-272485), chr5:138482436-138483146 (-271734), chr5:138400291-138400640 (-189409)	4
LSM3	chr3:14265459-14265692 (+45348), chr3:14266443-14266906 (+46447), chr3:14290275-14291034 (+70427), chr3:14377633-14378419 (+157798)	4
LRRC34	chr3:169671253-169672132 (-141119), chr3:169666526-169667336 (-136357), chr3:169589197-169589749 (-58899), chr3:169587414-169588245 (-57256)	4
LRIG3	chr12:59440410-59441316 (-126601), chr12:59438487-59439135 (-124549), chr12:59431046-59431843 (-117183), chr12:59423656-59424780 (-109956)	4
MAMLD1	chrX:149094545-149095019 (-436769), chrX:149100676-149101307 (-430559), chrX:149209316-149209976 (-321905)	4
MAGEA8	chrX:149094545-149095019 (+84841), chrX:149100676-149101307 (+91051), chrX:149209316-149209976 (+199705)	4
DPT	chr1:168908798-168909173 (-210544), chr1:168600526-168601293 (+97532), chr1:168590532-168591295 (+107528), chr1:168578158-168578793 (+119966)	4
TOB1	chr17:49020900-49022357 (-77914), chr17:48986662-48987067 (-43150), chr17:48981531-48982295 (-38198), chr17:48933025-48933906 (+10249)	4
TPD52L1	chr6:125422737-125423194 (-51913), chr6:125475868-125476466 (+1288), chr6:125519340-125519575 (+44579), chr6:125522968-125523793 (+48502)	4
SIL1	chr5:138483921-138484525 (+49842), chr5:138483216-138483867 (+50523), chr5:138482436-138483146 (+51274), chr5:138400291-138400640 (+133599)	4
SIAH2	chr3:150473642-150475562 (+6661), chr3:150462106-150463329 (+18545), chr3:150454743-150455698 (+26042), chr3:150453992-150454530 (+27002)	4
SLC16A7	chr12:59423656-59424780 (-658908), chr12:59431046-59431843 (-651681), chr12:59438487-59439135 (-644315), chr12:59440410-59441316 (-642263)	4
SLC1A2	chr11:35412386-35413741 (+28041), chr11:35411152-35412001 (+29528), chr11:35385473-35385926 (+55405), chr11:35317195-35317963 (+123526)	4
SLC16A3	chr17:80061688-80062414 (-124231), chr17:80071676-80072353 (-114267), chr17:80110478-80110799 (-75643), chr17:80192600-80193149 (+6593)	4
SHB	chr9:38046470-38048082 (+21934), chr9:38024092-38024600 (+44864), chr9:38022939-38023505 (+45988), chr9:37945003-37945404 (+124006)	4
SGK223	chr8:8513290-8513740 (-274258), chr8:8336450-8337001 (-97469), chr8:8319774-8319881 (-80571), chr8:8318740-8319680 (-79953)	4
SGK3	chr8:67601850-67602381 (-22537), chr8:67623160-67624233 (-956), chr8:67625014-67625630 (+669), chr8:67625649-67627340 (+1842)	4
SBNO2	chr19:1181474-1182277 (-7594), chr19:1167794-1167880 (+6445), chr19:1166621-1167357 (+7293), chr19:1164527-1165321 (+9358)	4
SEC62	chr3:169587414-169588245 (-96750), chr3:169589197-169589749 (-95107), chr3:169666526-169667336 (-17649), chr3:169671253-169672132 (-12887)	4
SELT	chr3:150453992-150454530 (+133195), chr3:150454743-150455698 (+134155), chr3:150462106-150463329 (+141652), chr3:150473642-150475562 (+153536)	4
SEMA3C	chr7:81075593-81076100 (-527180), chr7:81074965-81075376 (-526504), chr7:80571205-80573263 (-23567), chr7:80570898-80571064 (-22314)	4
BTC	chr4:75586852-75587124 (+132894), chr4:75345934-75346662 (+373584), chr4:75340555-75341270 (+378969), chr4:75338801-75339648 (+380657)	4
RPL9	chrX:23919139-23919668 (-63945), chrX:23907107-23907727 (-51958), chrX:23821881-23822605 (+33216)	4
RTKN2	chr10:63866788-63867508 (+161318), chr10:63842034-63842586 (+186156), chr10:63741173-63741710 (+287024), chr10:63683040-63683553 (+345169)	4
ATP10A	chr15:26106214-26106499 (+1992), chr15:26105380-26106170 (+2574), chr15:26094258-26094828 (+13806), chr15:26093531-26094018 (+14574)	4
ASCC2	chr22:30212699-30213098 (+21394), chr22:30210013-30210473 (+24050), chr22:30194515-30195710 (+39180), chr22:30190865-30191303 (+43209)	4
ARID5B	chr10:63683040-63683553 (+22284), chr10:63741173-63741710 (+80429), chr10:63842034-63842586 (+181297), chr10:63866788-63867508 (+206135)	4
B4GALNT3	chr12:680549-681517 (+111490), chr12:706274-706988 (+137088), chr12:707208-707763 (+137943), chr12:740926-741950 (+171895)	4
BCR	chr22:23489687-23490195 (-32611), chr22:23534492-23534829 (+12109), chr22:23800716-23801530 (+278571), chr22:23878335-23878733 (+355982)	4
ATXN3L	chrX:13517190-13517767 (-178961), chrX:13506111-13506635 (-167855), chrX:13082757-13083172 (+255553)	4
GGT2	chr22:21619463-21619888 (-55904), chr22:21499112-21499776 (+64328), chr22:21425307-21425364 (+138436), chr22:21392051-21392484 (+171504)	4
GADD45B	chr19:2491106-2491883 (+15372), chr19:2520091-2520617 (+44231), chr19:2528700-2529303 (+52879), chr19:2529410-2529977 (+53571)	4
GAB2	chr11:78022805-78023467 (+105732), chr11:78006041-78006891 (+122402), chr11:78001255-78001714 (+127383), chr11:77970462-77971734 (+157770)	4
GRM4	chr6:33963496-33964026 (+137875), chr6:33959428-33959939 (+141952), chr6:33958560-33959020 (+142846), chr6:33796040-33796416 (+305408)	4
GNG7	chr19:2529410-2529977 (+173052), chr19:2528700-2529303 (+173744), chr19:2520091-2520617 (+182392), chr19:2491106-2491883 (+211251)	4
GNAO1	chr16:56404616-56405501 (+179808), chr16:56405781-56405800 (+180540), chr16:56405984-56407469 (+181476)	3
ARHGEF12	chr11:120497174-120498147 (+290043), chr11:120498986-120499505 (+291628), chr11:120507444-120508612 (+300410)	3
GREB1L	chr18:18764263-18764724 (-57709), chr18:18767875-18768670 (-53930), chr18:18909945-18910613 (+88076)	3
GREM1	chr15:33132670-33133224 (+122742), chr15:33314744-33315222 (+304778), chr15:33319913-33320543 (+310023)	3
GPX4	chr19:1164527-1165321 (+60988), chr19:1166621-1167357 (+63053), chr19:1167794-1167880 (+63901)	3
GADD45G	chr9:92279765-92280273 (+60092), chr9:92458389-92458757 (+238646), chr9:92492352-92492755 (+272627)	3
FTO	chr16:53789005-53789407 (+51331), chr16:54114540-54115033 (+376912), chr16:54115236-54115518 (+377502)	3
FZD4	chr11:86717039-86717622 (-50891), chr11:86716182-86716960 (-50131), chr11:86651049-86651570 (+15130)	3
GALNT7	chr4:173730438-173730873 (-359248), chr4:173959540-173960103 (-130082), chr4:173960704-173961169 (-128967)	3
GCLC	chr6:53333842-53334351 (+75830), chr6:53330418-53331016 (+79210), chr6:53329258-53330295 (+80150)	3
GAS6	chr13:114788354-114788777 (-221520), chr13:114740084-114740630 (-173311), chr13:114622262-114622496 (-55333)	3
GMDS	chr6:2743912-2744391 (-498284), chr6:1832912-1833467 (+412678), chr6:1641281-1642038 (+604208)	3
GLI3	chr7:42870674-42872700 (-595069), chr7:42195992-42196421 (+80411), chr7:41995284-41995903 (+281024)	3
BACE2	chr21:42395782-42396627 (-143523), chr21:42512678-42513414 (-26682), chr21:42514854-42515049 (-24776)	3
BCAR3	chr1:94245043-94245736 (-98005), chr1:94064612-94065001 (+82578), chr1:94064036-94064446 (+83144)	3
BHLHE23	chr20:61838251-61838677 (-200077), chr20:61829905-61830256 (-191694), chr20:61701070-61701480 (-62888)	3
BICC1	chr10:60172309-60172875 (-100312), chr10:60197821-60197871 (-75058), chr10:60197881-60198602 (-74662)	3
BIRC7	chr20:61701070-61701480 (-166001), chr20:61829905-61830256 (-37195), chr20:61838251-61838677 (-28812)	3
BLID	chr11:121348907-121349381 (+637779), chr11:121342824-121343447 (+643787), chr11:121337048-121337800 (+649499)	3
ARRB1	chr11:75077810-75078432 (-15246), chr11:75054481-75054963 (+8153), chr11:75053830-75054464 (+8728)	3
ATP6V1C2	chr2:10897600-10897995 (+36023), chr2:10913787-10914535 (+52386), chr2:10925112-10925530 (+63546)	3
ATP13A3	chr3:194218385-194219492 (-29971), chr3:194215442-194216636 (-27071), chr3:194214749-194215410 (-26112)	3
ATP1A1	chr1:116557790-116558574 (-357613), chr1:116854524-116855031 (-61017), chr1:116996115-116996563 (+80544)	3
ASTN2	chr9:120168549-120169136 (+8474), chr9:120162291-120163068 (+14637), chr9:119455401-119456181 (+721526)	3
ATG16L1	chr2:234179941-234179954 (+19731), chr2:234180396-234181070 (+20516), chr2:234198700-234199023 (+38645)	3
ATG16L2	chr11:72496878-72498110 (-27957), chr11:72498324-72498875 (-26851), chr11:72783772-72784324 (+258597)	3
RPS3	chr11:75077810-75078432 (-32441), chr11:75133059-75133690 (+22813), chr11:75133703-75134135 (+23357)	3
RPS6KA5	chr14:91575517-91576085 (-48808), chr14:91554282-91554687 (-27492), chr14:91553423-91554243 (-26840)	3
RUNX1	chr21:37330684-37331208 (-909351), chr21:37325848-37326421 (-904540), chr21:36589681-36590420 (-168456)	3
RPS14	chr5:149881680-149882317 (-52680), chr5:149880282-149881002 (-51323), chr5:149878202-149879409 (-49487)	3
RPL3	chr22:39680219-39680595 (+35263), chr22:39679511-39680123 (+35853), chr22:39648024-39648419 (+67448)	3
C12orf49	chr12:117101278-117101787 (+74310), chr12:117100512-117101246 (+74964), chr12:117096463-117096933 (+79145)	3
SEMA3F	chr3:50164269-50165336 (-28045), chr3:50183885-50184412 (-8699), chr3:50187930-50189237 (-4264)	3
2011-09-01	chr4:77484518-77485136 (-386068), chr4:77492360-77493140 (-378145), chr4:77532301-77533236 (-338126)	3
SCUBE2	chr11:9124874-9125410 (-11992), chr11:9120124-9120638 (-7231), chr11:9098091-9098565 (+14822)	3
SCARB1	chr12:125389224-125389731 (-40959), chr12:125215049-125215718 (+133135), chr12:125093455-125094043 (+254770)	3
SCMH1	chr1:41904237-41904790 (-196699), chr1:41512006-41512542 (+195541), chr1:41511384-41511856 (+196195)	3
SAG	chr2:234179941-234179954 (-36361), chr2:234180396-234181070 (-35576), chr2:234198700-234199023 (-17447)	3
SERPINA11	chr14:94879078-94879750 (+39708), chr14:94878579-94878638 (+40513), chr14:94870463-94871353 (+48214)	3
SERPINA6	chr14:94841951-94842773 (-52674), chr14:94822679-94823499 (-33401), chr14:94788717-94789358 (+650)	3
SHROOM3	chr4:77484518-77485136 (+128574), chr4:77492360-77493140 (+136497), chr4:77532301-77533236 (+176516)	3
SLC22A16	chr6:110876000-110876630 (-78471), chr6:110834333-110834530 (-36588), chr6:110805491-110806013 (-7908)	3
SLC22A23	chr6:3710362-3711178 (-253977), chr6:3669958-3670569 (-213471), chr6:3664677-3665745 (-208418)	3
SIPA1L1	chr14:71839091-71839814 (-156576), chr14:72105193-72106009 (+109572), chr14:72113604-72114284 (+117915)	3
SHQ1	chr3:72799510-72799895 (+97895), chr3:72795553-72796609 (+101517), chr3:72772038-72772514 (+125322)	3
TMTC2	chr12:83076430-83077055 (-4191), chr12:83324873-83325620 (+244313), chr12:83348737-83349474 (+268172)	3
TOX2	chr20:42770759-42770986 (+227381), chr20:42771130-42771799 (+227973), chr20:42794310-42795415 (+251371)	3
TMEM44	chr3:194218385-194219492 (+135211), chr3:194215442-194216636 (+138111), chr3:194214749-194215410 (+139070)	3
DPM2	chr9:130809300-130810277 (-109026), chr9:130784284-130785033 (-83896), chr9:130731763-130732295 (-31266)	3
DSP	chr6:7418357-7418957 (-123213), chr6:7464006-7464294 (-77720), chr6:7561387-7562335 (+19991)	3
DYNLRB2	chr16:80647645-80648364 (+73151), chr16:80648758-80649164 (+74107), chr16:80653775-80654295 (+79181)	3
EBNA1BP2	chr1:43701424-43701803 (-63373), chr1:43672469-43672962 (-34475), chr1:43457835-43458519 (+180064)	3
LIPM	chr10:90611352-90611866 (+49122), chr10:90615732-90616117 (+53438), chr10:90632400-90633098 (+70262)	3
LMCD1	chr3:8485891-8486552 (-57289), chr3:8497934-8498942 (-45073), chr3:8545441-8545943 (+2181)	3
LOC344967	chr4:40193131-40193548 (-134521), chr4:40192365-40192830 (-133779), chr4:40191591-40192200 (-133077)	3
LOC388630	chr1:48360330-48360840 (+101977), chr1:47943624-47944244 (+518628), chr1:47942900-47943143 (+519540)	3
EDEM3	chr1:184898922-184899471 (-175156), chr1:184601870-184602400 (+121906), chr1:184591340-184591835 (+132453)	3
LPAR1	chr9:113802750-113803161 (-2591), chr9:113799233-113800073 (+712), chr9:113798335-113799179 (+1608)	3
LPAR3	chr1:85295621-85296063 (+63054), chr1:85293198-85293582 (+65506), chr1:85225327-85225942 (+133261)	3
LPHN2	chr1:81472778-81473165 (-793110), chr1:81473953-81474045 (-792083), chr1:81630011-81630641 (-635756)	3
MAN1A1	chr6:120004002-120004924 (-333537), chr6:119797169-119797811 (-126564), chr6:119767825-119768155 (-97064)	3
MAB21L2	chr4:151001930-151002338 (-500943), chr4:151136726-151137253 (-366087), chr4:151153104-151153561 (-349744)	3
MAFB	chr20:39531941-39532501 (-214345), chr20:39277583-39278075 (+40047), chr20:38945937-38946777 (+371519)	3
MAN1C1	chr1:25893187-25893677 (-50527), chr1:25894554-25895019 (-49172), chr1:26083585-26084466 (+140067)	3
LUC7L3	chr17:48840993-48841877 (+44509), chr17:48862231-48863873 (+66126), chr17:48869471-48869972 (+72796)	3
LYPLA1	chr8:55002611-55003025 (+11759), chr8:55000373-55000838 (+13971), chr8:54988286-54988800 (+26034)	3
LY86	chr6:6725280-6725635 (+136524), chr6:6758912-6759835 (+170440), chr6:7062492-7063229 (+473927)	3
MLYCD	chr16:83956702-83957282 (+24262), chr16:83977035-83977244 (+44410), chr16:83980110-83981182 (+47916)	3
FOXD2	chr1:47942900-47943143 (+41333), chr1:47943624-47944244 (+42245), chr1:48360330-48360840 (+458896)	3
FN1	chr2:216847014-216848214 (-546823), chr2:216838137-216838553 (-537554), chr2:216226534-216226974 (+74037)	3
FNBP1L	chr1:93865290-93865942 (-48072), chr1:94064036-94064446 (+150553), chr1:94064612-94065001 (+151119)	3
FOS	chr14:75721565-75722200 (-23598), chr14:75722668-75722855 (-22719), chr14:75730553-75731195 (-14607)	3
MED28	chr4:17684739-17685098 (+68646), chr4:17702079-17703360 (+86447), chr4:17755014-17755891 (+139180)	3
MESP1	chr15:90310804-90311150 (-16437), chr15:90310037-90310068 (-15513), chr15:90306854-90307406 (-12590)	3
MESP2	chr15:90306854-90307406 (-12459), chr15:90310037-90310068 (-9536), chr15:90310804-90311150 (-8612)	3
MARCKS	chr6:113651527-113652200 (-526663), chr6:113771060-113771891 (-407051), chr6:114203539-114204006 (+25246)	3
MED23	chr6:131952582-131953193 (-3525), chr6:131951540-131951634 (-2224), chr6:131950625-131951253 (-1576)	3
MECOM	chr3:169472322-169472938 (-91067), chr3:169341286-169343025 (+39407), chr3:168985693-168986915 (+395259)	3
PPIP5K2	chr5:102744944-102745388 (+280156), chr5:102779944-102780581 (+315253), chr5:102781274-102781818 (+316536)	3
PPP2R4	chr9:131869463-131870057 (-3468), chr9:131955411-131956716 (+82836), chr9:132168522-132169129 (+295598)	3
PQLC2	chr1:19686827-19687247 (+48297), chr1:19752163-19752405 (+113544), chr1:19753524-19754286 (+115165)	3
PQLC3	chr2:11261555-11262092 (-33716), chr2:11262243-11263057 (-32890), chr2:11263088-11263279 (-32356)	3
PRKCH	chr14:61905211-61906212 (+117197), chr14:61980650-61981219 (+192420), chr14:61991872-61992406 (+203624)	3
PRKAA2	chr1:57253298-57253476 (+142397), chr1:57253720-57254603 (+143172), chr1:57276868-57277401 (+166145)	3
PRR15	chr7:29270581-29271035 (-332619), chr7:29417180-29417724 (-185975), chr7:29489426-29490060 (-113684)	3
PRKCD	chr3:53179139-53179751 (-15778), chr3:53184078-53184614 (-10877), chr3:53189741-53190317 (-5194)	3
PLXND1	chr3:129392505-129393326 (-67334), chr3:129383540-129383872 (-58124), chr3:129381632-129382515 (-56492)	3
PLCE1	chr10:95764866-95765373 (+11374), chr10:95795809-95796783 (+42550), chr10:95882913-95883674 (+129548)	3
PLEKHG6	chr12:6344438-6345094 (-74836), chr12:6373803-6374255 (-45573), chr12:6389157-6389519 (-30264)	3
PPARGC1B	chr5:149140815-149141345 (+31265), chr5:149317531-149317617 (+207759), chr5:149317742-149318267 (+208190)	3
DHX15	chr4:24765270-24766200 (-179551), chr4:24597182-24597784 (-11299), chr4:24596608-24597126 (-10683)	3
DFNA5	chr7:24935334-24936005 (-138587), chr7:24897617-24898343 (-100897), chr7:24752730-24753508 (+43964)	3
DLAT	chr11:111853711-111854668 (-41348), chr11:111857367-111857791 (-37959), chr11:111859182-111859995 (-35949)	3
DOCK10	chr2:226480924-226481941 (-574103), chr2:226479513-226480771 (-572812), chr2:225472738-225473191 (+434365)	3
CYP4F8	chr19:15673730-15673997 (-52165), chr19:15699105-15699530 (-26711), chr19:15705873-15706528 (-19828)	3
CYP2A7	chr19:41403718-41404400 (-15402), chr19:41402940-41403647 (-14637), chr19:41402609-41402933 (-14114)	3
CYB5D2	chr17:4064443-4065413 (+18466), chr17:4090326-4090841 (+44122), chr17:4133418-4133784 (+87139)	3
DBX1	chr11:20057842-20058332 (+123783), chr11:20016338-20017190 (+165106), chr11:20002718-20003417 (+178802)	3
DCAF16	chr4:17755014-17755891 (+56928), chr4:17702079-17703360 (+109661), chr4:17684739-17685098 (+127462)	3
DCLK2	chr4:151001930-151002338 (+2708), chr4:151136726-151137253 (+137564), chr4:151153104-151153561 (+153907)	3
SMOC2	chr6:168791374-168791941 (-50173), chr6:168793759-168794183 (-47860), chr6:168853608-168853988 (+11967)	3
SLC7A4	chr22:21499112-21499776 (-112597), chr22:21425307-21425364 (-38489), chr22:21392051-21392484 (-5421)	3
SLC7A5	chr16:87874581-87875026 (+28296), chr16:87840482-87841149 (+62284), chr16:87808495-87808950 (+94377)	3
SLC8A1	chr2:41370698-41370941 (-713376), chr2:41369661-41370085 (-712429), chr2:41345676-41346201 (-688495)	3
SORL1	chr11:121337048-121337800 (+14512), chr11:121342824-121343447 (+20224), chr11:121348907-121349381 (+26232)	3
SOX13	chr1:203883391-203883942 (-158579), chr1:203900999-203901730 (-140881), chr1:204114381-204114992 (+72441)	3
SPAG9	chr17:49020900-49022357 (+176597), chr17:48986662-48987067 (+211361), chr17:48981531-48982295 (+216313)	3
CD9	chr12:6344438-6345094 (+35284), chr12:6373803-6374255 (+64547), chr12:6389157-6389519 (+79856)	3
CDK19	chr6:110876000-110876630 (+260097), chr6:110834333-110834530 (+301980), chr6:110805491-110806013 (+330660)	3
CDHR3	chr7:105457437-105457789 (-146044), chr7:105709227-105710119 (+106016), chr7:105710248-105710307 (+106621)	3
SLC25A21	chr14:38057154-38057589 (-415507), chr14:38015530-38016913 (-374357), chr14:37905639-37906291 (-264100)	3
SLC7A11	chr4:139833046-139834514 (-670277), chr4:139831448-139832606 (-668524), chr4:139818798-139819779 (-655786)	3
SLC45A4	chr8:142273878-142275044 (-35788), chr8:142238544-142239070 (-134), chr8:142163928-142164663 (+74377)	3
SLC31A2	chr9:115899438-115900781 (-13128), chr9:115901697-115902399 (-11190), chr9:115905864-115906372 (-7120)	3
C8A	chr1:57253298-57253476 (-67056), chr1:57253720-57254603 (-66281), chr1:57276868-57277401 (-43308)	3
CAPZB	chr1:19753524-19754286 (+58161), chr1:19752163-19752405 (+59782), chr1:19686827-19687247 (+125029)	3
CCRN4L	chr4:139818798-139819779 (-117654), chr4:139831448-139832606 (-104916), chr4:139833046-139834514 (-103163)	3
CACNA1D	chr3:53552577-53553766 (+24141), chr3:53557186-53557917 (+28521), chr3:53625651-53625941 (+96765)	3
C2CD4B	chr15:62765126-62765511 (-307837), chr15:62748884-62749267 (-291594), chr15:62404594-62405605 (+52382)	3
C3orf58	chr3:144100372-144100392 (+409742), chr3:144102658-144103582 (+412480), chr3:144174789-144175410 (+484460)	3
ST6GAL2	chr2:108425042-108425379 (-921648), chr2:107177199-107177673 (+326127), chr2:107176116-107176676 (+327167)	3
SSX2IP	chr1:85295621-85296063 (-139602), chr1:85293198-85293582 (-137150), chr1:85225327-85225942 (-69395)	3
STEAP1B	chr7:22712831-22713376 (-173203), chr7:22482545-22483007 (+57125), chr7:22429064-22429966 (+110386)	3
STAMBPL1	chr10:90611352-90611866 (-28417), chr10:90615732-90616117 (-24101), chr10:90632400-90633098 (-7277)	3
SRGAP1	chr12:64199426-64200325 (-38665), chr12:64255873-64256492 (+17642), chr12:64474893-64475120 (+236466)	3
SPTBN5	chr15:42221273-42222003 (-35363), chr15:42219992-42220786 (-34114), chr15:42217105-42218107 (-31331)	3
SPTLC2	chr14:78147562-78148511 (-64927), chr14:78089694-78090299 (-6887), chr14:78088403-78089660 (-5922)	3
SPTSSA	chr14:34831817-34832279 (+99420), chr14:34830365-34831038 (+100766), chr14:34794974-34795307 (+136327)	3
SPIN1	chr9:90959328-90959914 (-43676), chr9:91113702-91114123 (+110616), chr9:91144564-91145563 (+141767)	3
SPOCD1	chr1:32396889-32398446 (-116088), chr1:32376528-32376972 (-95170), chr1:32308206-32309076 (-27061)	3
SPOP	chr17:47706921-47707938 (+48095), chr17:47681478-47682386 (+73593), chr17:47673744-47674202 (+81552)	3
SPRY2	chr13:81716572-81717450 (-801925), chr13:80813783-80814464 (+100962), chr13:80706857-80707180 (+208067)	3
WDR11	chr10:122705517-122705929 (+95036), chr10:122814479-122814848 (+203977), chr10:123273904-123274446 (+663488)	3
WDR26	chr1:224641816-224642875 (-20345), chr1:224637955-224639190 (-16572), chr1:224626196-224627205 (-4700)	3
WDSUB1	chr2:159967692-159968610 (+175085), chr2:159947949-159948311 (+195106), chr2:159920173-159920259 (+223020)	3
XCL1	chr1:168578158-168578793 (+32765), chr1:168590532-168591295 (+45203), chr1:168600526-168601293 (+55199)	3
WNT7B	chr22:46448110-46448624 (-75359), chr22:46213971-46214343 (+158851), chr22:46138715-46139061 (+234120)	3
YIPF5	chr5:143077993-143078470 (+472046), chr5:142974346-142975338 (+575436), chr5:142940646-142941200 (+609355)	3
ZNF778	chr16:89411974-89412617 (+128185), chr16:89428928-89429387 (+145047), chr16:89449339-89449854 (+165486)	3
PISD	chr22:32033856-32034458 (-7347), chr22:31981194-31982871 (+44777), chr22:31975758-31976408 (+50727)	3
PIM3	chr22:50324635-50325029 (-29311), chr22:50364318-50364747 (+10390), chr22:50465953-50466359 (+112013)	3
PHLDA1	chr12:76329962-76330891 (+95129), chr12:76119022-76119224 (+306433), chr12:76099721-76100951 (+325220)	3
ZBTB16	chr11:114030599-114031214 (+99619), chr11:114033445-114033978 (+102424), chr11:114049841-114050429 (+118847)	3
ZBTB7C	chr18:45980470-45980877 (-316994), chr18:45979759-45980307 (-316353), chr18:45684350-45684762 (-20876)	3
ZFP37	chr9:115905864-115906372 (-87122), chr9:115901697-115902399 (-83052), chr9:115899438-115900781 (-81114)	3
ZNF552	chr19:58325238-58325840 (+742), chr19:58324417-58325161 (+1492), chr19:58309896-58311124 (+15771)	3
ZNF217	chr20:52468600-52469064 (-269125), chr20:52402557-52403229 (-203186), chr20:51962623-51963298 (+236746)	3
MRPS10	chr6:42195120-42195733 (-9794), chr6:42194422-42195075 (-9116), chr6:42192040-42192588 (-6681)	3
MS4A7	chr11:60137461-60138992 (-7731), chr11:60139281-60139335 (-6650), chr11:60143692-60144858 (-1683)	3
ARHGAP17	chr16:25060945-25061394 (-34495), chr16:25051541-25052372 (-25282), chr16:25048970-25049326 (-22473)	3
ARHGAP21	chr10:24907276-24907724 (+105097), chr10:24831177-24832085 (+180966), chr10:24633173-24633648 (+379186)	3
ARHGAP26	chr5:142100094-142100539 (-49975), chr5:142562298-142563190 (+412452), chr5:142577390-142577893 (+427350)	3
APH1B	chr15:63539300-63539712 (-30243), chr15:63671519-63672522 (+102272), chr15:63672577-63673027 (+103053)	3
AP1B1	chr22:29782047-29782512 (+2292), chr22:29781416-29782037 (+2845), chr22:29730819-29731267 (+53529)	3
AP2S1	chr19:47412457-47413526 (-58789), chr19:47409490-47410277 (-55681), chr19:47377385-47377892 (-23436)	3
NADKD1	chr5:36288050-36288448 (-46349), chr5:36285766-36286373 (-44170), chr5:36281627-36282073 (-39950)	3
NBPF4	chr1:108924214-108925348 (-138078), chr1:108779777-108780897 (+6366), chr1:108778005-108778330 (+8535)	3
NAIF1	chr9:130809300-130810277 (+19810), chr9:130784284-130785033 (+44940), chr9:130731763-130732295 (+97570)	3
NAMPT	chr7:105857622-105858135 (+67759), chr7:105857095-105857300 (+68440), chr7:105792558-105793220 (+132749)	3
NAT9	chr17:72769793-72770390 (+2378), chr17:72765679-72767220 (+6020), chr17:72753433-72755191 (+18158)	3
NAV2	chr11:20002718-20003417 (+268187), chr11:20016338-20017190 (+281883), chr11:20057842-20058332 (+323206)	3
N6AMT1	chr21:30229979-30230665 (+27371), chr21:30205469-30205920 (+51998), chr21:30204394-30204854 (+53069)	3
MYO10	chr5:16787258-16787830 (+148841), chr5:16749617-16750233 (+186460), chr5:16744402-16745263 (+191552)	3
ACTR2	chr2:65527187-65527900 (+72715), chr2:65536677-65537272 (+82146), chr2:65537699-65538100 (+83071)	3
ADCY10	chr1:167895775-167896215 (-12542), chr1:167883137-167884052 (-142), chr1:167880387-167881247 (+2636)	3
ABCC11	chr16:48268931-48270258 (-507), chr16:48264550-48264602 (+4512), chr16:48199184-48199790 (+69601)	3
ABCD3	chr1:94715897-94716263 (-167853), chr1:94791125-94791627 (-92557), chr1:94888444-94889043 (+4811)	3
ABCC5	chr3:183730021-183730687 (+5373), chr3:183728585-183729622 (+6623), chr3:183725618-183726514 (+9661)	3
ABHD2	chr15:89658615-89659327 (+27590), chr15:89693785-89693885 (+62454), chr15:89693977-89694583 (+62899)	3
ACER3	chr11:76499648-76500250 (-71968), chr11:76512479-76513339 (-59008), chr11:76547140-76547758 (-24468)	3
AMFR	chr16:56405984-56407469 (+52717), chr16:56405781-56405800 (+53653), chr16:56404616-56405501 (+54385)	3
ANKFY1	chr17:4133418-4133784 (+33673), chr17:4090326-4090841 (+76690), chr17:4064443-4065413 (+102346)	3
ANKRD11	chr16:89449339-89449854 (+107372), chr16:89428928-89429387 (+127811), chr16:89411974-89412617 (+144673)	3
ALKBH1	chr14:78147562-78148511 (+26319), chr14:78089694-78090299 (+84359), chr14:78088403-78089660 (+85324)	3
ALOX5AP	chr13:31317032-31317504 (+29653), chr13:31317600-31317984 (+30177), chr13:31370302-31370916 (+82994)	3
AGPAT4	chr6:161762938-161763529 (-68127), chr6:161752421-161753124 (-57666), chr6:161487851-161488426 (+206968)	3
AGR2	chr7:16919990-16920730 (-75622), chr7:16886106-16887639 (-42135), chr7:16849678-16850762 (-5482)	3
ADRB1	chr10:115681483-115682310 (-121909), chr10:115686914-115687711 (-116493), chr10:115816763-115817202 (+13177)	3
IL19	chr1:206970298-206970776 (-1678), chr1:207015153-207015749 (+43236), chr1:207016776-207017670 (+45008)	3
IL12A	chr3:159572168-159573075 (-134001), chr3:159709821-159710029 (+3302), chr3:159710350-159711037 (+4071)	3
IGLL1	chr22:23878335-23878733 (+43961), chr22:23800716-23801530 (+121372), chr22:23534492-23534829 (+387834)	3
IMPAD1	chr8:58499055-58500265 (-593230), chr8:58492856-58493425 (-586711), chr8:58490535-58491431 (-584553)	3
HS3ST3B1	chr17:14109266-14109778 (-94984), chr17:14639630-14640522 (+435570), chr17:14641198-14641982 (+437084)	3
HSPH1	chr13:31370302-31370916 (+365508), chr13:31317600-31317984 (+418325), chr13:31317032-31317504 (+418849)	3
HTT	chr4:3112953-3113824 (+36981), chr4:3113897-3114441 (+37761), chr4:3124869-3125656 (+48855)	3
ID2	chr2:7932308-7932888 (-889515), chr2:8640688-8641041 (-181248), chr2:8944180-8944522 (+122238)	3
HK1	chr10:71092498-71093457 (+63222), chr10:71120373-71120931 (+90896), chr10:71145673-71146169 (+116165)	3
HIF1A	chr14:61905211-61906212 (-256407), chr14:61980650-61981219 (-181184), chr14:61991872-61992406 (-169980)	3
HMBOX1	chr8:29042746-29043416 (+295170), chr8:29047541-29047871 (+299795), chr8:29116736-29117241 (+369078)	3
HMCN1	chr1:185503951-185504319 (-199548), chr1:185614839-185615189 (-88669), chr1:185615323-185615764 (-88139)	3
HMG20A	chr15:77789437-77789790 (+76371), chr15:77796582-77797067 (+83582), chr15:77888956-77889471 (+175971)	3
HMP19	chr5:173909428-173910039 (+437010), chr5:173910295-173910930 (+437889), chr5:174136253-174136725 (+663765)	3
NCCRP1	chr19:39624872-39625416 (-62460), chr19:39645168-39645823 (-42108), chr19:39650842-39651444 (-36461)	3
NDRG1	chr8:134372222-134373049 (-63089), chr8:134368386-134368935 (-59114), chr8:134228315-134229329 (+80725)	3
NEDD9	chr6:11389940-11390771 (-157441), chr6:11288209-11288699 (-55539), chr6:11207340-11207904 (+25293)	3
NOG	chr17:54249408-54249415 (-421648), chr17:54249852-54250442 (-420913), chr17:54885814-54886280 (+214987)	3
NOL10	chr2:10737982-10738480 (+91881), chr2:10630899-10631288 (+199018), chr2:10627176-10627710 (+202669)	3
NOTCH2NL	chr1:145218715-145219739 (+10116), chr1:145233618-145234200 (+24798), chr1:145245483-145247398 (+37330)	3
NOSTRIN	chr2:169484869-169485264 (-173824), chr2:169489184-169489624 (-169487), chr2:169658759-169659071 (+24)	3
NOC3L	chr10:95882913-95883674 (+239389), chr10:95795809-95796783 (+326387), chr10:95764866-95765373 (+357563)	3
HELT	chr4:185814104-185814482 (-125790), chr4:185815336-185815391 (-124719), chr4:185819825-185820390 (-119975)	3
HERC6	chr4:89239722-89240551 (-59754), chr4:89241596-89242649 (-57768), chr4:89255810-89256685 (-43643)	3
NR1D2	chr3:24406617-24407224 (+420170), chr3:24529264-24529734 (+542748), chr3:24531519-24532097 (+545057)	3
NOX5	chr15:69292607-69293210 (-14125), chr15:69294169-69294645 (-12627), chr15:69327159-69327308 (+20200)	3
NPAS1	chr19:47423905-47424254 (-100063), chr19:47428416-47429019 (-95425), chr19:47479298-47479939 (-44524)	3
GUCA1A	chr6:42084753-42085559 (-37988), chr6:42085757-42086822 (-36854), chr6:42096675-42097438 (-26087)	3
GUCY2E	chr11:76484473-76485390 (-52099), chr11:76483431-76484173 (-50969), chr11:76481778-76482368 (-49240)	3
OR6W1P	chr7:142823117-142824193 (-62773), chr7:142817657-142818747 (-57320), chr7:142793086-142793608 (-32465)	3
OSBPL9	chr1:52033028-52033869 (-49097), chr1:52037920-52038500 (-44336), chr1:52126332-52126956 (+44098)	3
OSGIN1	chr16:83956702-83957282 (-29835), chr16:83977035-83977244 (-9687), chr16:83980110-83981182 (-6181)	3
P2RX2	chr12:133042883-133043791 (-152066), chr12:133198800-133199355 (+3675), chr12:133199483-133200583 (+4630)	3
PADI4	chr1:17630628-17631006 (-3873), chr1:17631023-17631344 (-3506), chr1:17640966-17641760 (+6673)	3
NXPH3	chr17:47673744-47674202 (+20675), chr17:47681478-47682386 (+28634), chr17:47706921-47707938 (+54132)	3
NUDT12	chr5:102781274-102781818 (+116944), chr5:102779944-102780581 (+118227), chr5:102744944-102745388 (+153324)	3
NUDT4	chr12:93538718-93539461 (-232611), chr12:93708036-93708903 (-63231), chr12:93806364-93807032 (+34997)	3
OLFML3	chr1:114518974-114519917 (-2584), chr1:114521745-114522203 (-56), chr1:114576550-114577142 (+54816)	3
OPA1	chr3:193531066-193531817 (+220509), chr3:193588016-193589124 (+277637), chr3:193639955-193640839 (+329464)	3
PAK4	chr19:39624872-39625416 (+8724), chr19:39645168-39645823 (+29076), chr19:39650842-39651444 (+34723)	3
PDE6H	chr12:15296334-15297061 (+170742), chr12:15341006-15341546 (+215320), chr12:15368843-15370207 (+243569)	3
PDGFRL	chr8:17476318-17476881 (+42658), chr8:17532944-17533343 (+99202), chr8:17533653-17534210 (+99990)	3
PDE6A	chr5:149317742-149318267 (+6351), chr5:149317531-149317617 (+6782), chr5:149140815-149141345 (+183276)	3
TTC32	chr2:20132649-20133710 (-31436), chr2:19875120-19875587 (+226390), chr2:19874745-19875111 (+226816)	3
TTC39C	chr18:21302458-21303039 (-291635), chr18:21305649-21306189 (-288465), chr18:21688536-21689036 (+94402)	3
TTI1	chr20:36737986-36738532 (-76426), chr20:36736749-36737917 (-75500), chr20:36688162-36688665 (-26581)	3
TUFT1	chr1:151486308-151487089 (-26082), chr1:151519243-151520144 (+6913), chr1:151554386-151554929 (+41877)	3
TUBB8	chr10:198750-200042 (-104218), chr10:193489-194405 (-98769), chr10:141565-142125 (-46667)	3
UACA	chr15:70754746-70755943 (+300505), chr15:70667312-70667858 (+388265), chr15:70613457-70614146 (+442048)	3
TRERF1	chr6:42195120-42195733 (+224356), chr6:42194422-42195075 (+225034), chr6:42192040-42192588 (+227469)	3
TRIM32	chr9:119455401-119456181 (+6210), chr9:120162291-120163068 (+713099), chr9:120168549-120169136 (+719262)	3
TRPM3	chr9:73095597-73096107 (+640662), chr9:73089311-73089679 (+647019), chr9:73064435-73064847 (+671873)	3
NUAK1	chr12:106629439-106629973 (-95895), chr12:106589383-106589837 (-55799), chr12:106135413-106136016 (+398096)	3
UGCG	chr9:114601592-114602249 (-57285), chr9:114619742-114620389 (-39140), chr9:114827903-114828928 (+169210)	3
USP3	chr15:63679494-63681197 (-116464), chr15:63688512-63689206 (-107951), chr15:63695754-63696162 (-100852)	3
CHDH	chr3:53625651-53625941 (+254624), chr3:53557186-53557917 (+322868), chr3:53552577-53553766 (+327248)	3
CHML	chr1:241754606-241755593 (+44132), chr1:241752706-241753329 (+46214), chr1:241697070-241697489 (+101952)	3
CHN2	chr7:29270581-29271035 (+36687), chr7:29417180-29417724 (+183331), chr7:29489426-29490060 (+255622)	3
CERS6	chr2:169288138-169288591 (-24470), chr2:169484869-169485264 (+172232), chr2:169489184-169489624 (+176569)	3
CETN3	chr5:89518260-89518545 (+187200), chr5:89517695-89518206 (+187652), chr5:89465667-89466053 (+239743)	3
CPLX3	chr15:75108950-75110252 (-8216), chr15:75110929-75111337 (-6684), chr15:75120981-75121723 (+3535)	3
CITED2	chr6:140298741-140299608 (-603825), chr6:139697656-139698680 (-2818), chr6:139696399-139697072 (-1386)	3
KIAA1324	chr1:109638808-109639408 (-17477), chr1:109693659-109694584 (+37537), chr1:109694724-109695311 (+38433)	3
KIAA1217	chr10:24633173-24633648 (+135691), chr10:24831177-24832085 (+333911), chr10:24907276-24907724 (+409780)	3
KHDC1	chr6:73839446-73840231 (+133068), chr6:73737217-73739018 (+234789), chr6:73623600-73624046 (+349084)	3
JPH3	chr16:87808495-87808950 (+172224), chr16:87840482-87841149 (+204317), chr16:87874581-87875026 (+238305)	3
IVNS1ABP	chr1:185615323-185615764 (-329083), chr1:185614839-185615189 (-328553), chr1:185503951-185504319 (-217674)	3
KCNIP2	chr10:103724805-103725435 (-121443), chr10:103653339-103654007 (-49996), chr10:103606600-103607054 (-3150)	3
KCNQ5	chr6:73623600-73624046 (+292252), chr6:73737217-73739018 (+406547), chr6:73839446-73840231 (+508268)	3
CTIF	chr18:45684350-45684762 (-380871), chr18:45979759-45980307 (-85394), chr18:45980470-45980877 (-84753)	3
CRKL	chr22:21221502-21222125 (-49900), chr22:21241602-21242359 (-29733), chr22:21270962-21271564 (-451)	3
TGOLN2	chr2:85487025-85487180 (+68316), chr2:85486186-85486893 (+68879), chr2:85416088-85416756 (+138997)	3
THRB	chr3:24531519-24532097 (+4505), chr3:24529264-24529734 (+6814), chr3:24406617-24407224 (+129392)	3
TMED10	chr14:75730553-75731195 (-87525), chr14:75722668-75722855 (-79413), chr14:75721565-75722200 (-78534)	3
EFEMP1	chr2:56185341-56185896 (-34321), chr2:56066238-56066676 (+84841), chr2:56006730-56007282 (+144292)	3
TMEM241	chr18:20910996-20911615 (+106619), chr18:20861452-20862344 (+156027), chr18:20839425-20840878 (+177773)	3
TMEM135	chr11:86716182-86716960 (-32315), chr11:86717039-86717622 (-31555), chr11:87634842-87635613 (+886342)	3
TMEM170B	chr6:11288209-11288699 (-250057), chr6:11389940-11390771 (-148155), chr6:11586173-11586627 (+47889)	3
TCEA1	chr8:55002611-55003025 (-67810), chr8:55000373-55000838 (-65598), chr8:54988286-54988800 (-53535)	3
TBC1D14	chr4:6918296-6918727 (+7017), chr4:6919303-6919866 (+8090), chr4:6958814-6959333 (+47579)	3
TGM2	chr20:36737986-36738532 (+55441), chr20:36736749-36737917 (+56367), chr20:36688162-36688665 (+105286)	3
TCF7L1	chr2:85416088-85416756 (+55839), chr2:85486186-85486893 (+125957), chr2:85487025-85487180 (+126520)	3
TEKT4	chr2:95414865-95415337 (-122131), chr2:95682593-95683013 (+145571), chr2:95685999-95686407 (+148971)	3
TEKT5	chr16:10721857-10722596 (+66575), chr16:10695222-10696405 (+92988), chr16:10688178-10688955 (+100235)	3
TFAM	chr10:60172309-60172875 (+27416), chr10:60197821-60197871 (+52670), chr10:60197881-60198602 (+53066)	3
KMO	chr1:241697070-241697489 (+1846), chr1:241752706-241753329 (+57584), chr1:241754606-241755593 (+59666)	3
KRR1	chr12:76329962-76330891 (-425009), chr12:76119022-76119224 (-213705), chr12:76099721-76100951 (-194918)	3
KRT15	chr17:39695167-39696000 (-20314), chr17:39686406-39687404 (-11635), chr17:39676712-39679368 (-2770)	3
KLF9	chr9:73095597-73096107 (-66279), chr9:73089311-73089679 (-59922), chr9:73064435-73064847 (-35068)	3
LEF1	chr4:109185885-109186336 (-95999), chr4:108979791-108980339 (+110047), chr4:108974526-108975102 (+115298)	3
LAMA3	chr18:21209337-21209739 (-60024), chr18:21302458-21303039 (+33187), chr18:21305649-21306189 (+36357)	3
STRBP	chr9:126089806-126090585 (-59341), chr9:125970949-125971752 (+59504), chr9:125811969-125812500 (+218620)	3
TAF8	chr6:42084753-42085559 (+66905), chr6:42085757-42086822 (+68039), chr6:42096675-42097438 (+78806)	3
TANC1	chr2:159920173-159920259 (+95070), chr2:159947949-159948311 (+122984), chr2:159967692-159968610 (+143005)	3
SULF2	chr20:47314208-47315108 (-899850), chr20:46540844-46541267 (-126248), chr20:46135123-46135604 (+279444)	3
LINGO1	chr15:77888956-77889471 (+35495), chr15:77796582-77797067 (+127884), chr15:77789437-77789790 (+135095)	3
RANBP3L	chr5:36288050-36288448 (+13762), chr5:36285766-36286373 (+15941), chr5:36281627-36282073 (+20161)	3
RAP1GDS1	chr4:98417771-98418077 (-764603), chr4:99493736-99494161 (+311422), chr4:99538918-99539513 (+356689)	3
RAP2B	chr3:152687644-152688123 (-192145), chr3:152858208-152858814 (-21518), chr3:153777533-153778139 (+897807)	3
RBM48	chr7:92235419-92235889 (+77567), chr7:92236033-92236730 (+78295), chr7:92237827-92238496 (+80075)	3
RBBP8	chr18:20188815-20189181 (-324297), chr18:20193243-20193850 (-319748), chr18:20679581-20680044 (+166518)	3
RASA3	chr13:114788354-114788777 (+109529), chr13:114740084-114740630 (+157738), chr13:114622262-114622496 (+275716)	3
RASL10A	chr22:29782047-29782512 (-70532), chr22:29781416-29782037 (-69979), chr22:29730819-29731267 (-19295)	3
FGFR2	chr10:123273904-123274446 (+83797), chr10:122814479-122814848 (+543308), chr10:122705517-122705929 (+652249)	3
FHL2	chr2:106076324-106077066 (-61014), chr2:105994839-105995274 (+20624), chr2:105994293-105994725 (+21172)	3
FIGN	chr2:165379002-165379589 (-786783), chr2:164225485-164226061 (+366740), chr2:164224263-164224842 (+367960)	3
PSMD6	chr3:64160084-64160498 (-151171), chr3:63923326-63924065 (+85424), chr3:63918434-63919056 (+90375)	3
FCHSD2	chr11:72906353-72906994 (-53531), chr11:72904711-72906279 (-52352), chr11:72783772-72784324 (+69095)	3
PXDC1	chr6:3710362-3711178 (+41476), chr6:3669958-3670569 (+81982), chr6:3664677-3665745 (+87035)	3
PTP4A2	chr1:32396889-32398446 (+6320), chr1:32376528-32376972 (+27238), chr1:32308206-32309076 (+95347)	3
EMP2	chr16:10721857-10722596 (-47688), chr16:10695222-10696405 (-21275), chr16:10688178-10688955 (-14028)	3
ELP3	chr8:28004698-28005143 (+54337), chr8:28005240-28005591 (+54832), chr8:28005756-28006081 (+55335)	3
EIF4G3	chr1:21602716-21603293 (-99624), chr1:21578171-21578984 (-75197), chr1:21223387-21223759 (+279808)	3
EHD4	chr15:42221273-42222003 (+43117), chr15:42219992-42220786 (+44366), chr15:42217105-42218107 (+47149)	3
EGLN3	chr14:34831817-34832279 (-411764), chr14:34830365-34831038 (-410418), chr14:34794974-34795307 (-374857)	3
EPB41L4B	chr9:112207175-112207733 (-124433), chr9:112093566-112094107 (-10816), chr9:112092062-112092605 (-9313)	3
EZR	chr6:159302225-159302682 (-63114), chr6:159282678-159283110 (-43554), chr6:159126068-159126958 (+112827)	3
FAM110B	chr8:58490535-58491431 (-416130), chr8:58492856-58493425 (-413972), chr8:58499055-58500265 (-407453)	3
FAM75D1	chr9:85538119-85538684 (+934715), chr9:85553283-85553897 (+949903), chr9:85554317-85554863 (+950903)	3
FAM55B	chr11:115341958-115342718 (+793138), chr11:115368962-115369551 (+820057), chr11:115369888-115370517 (+821003)	3
RHOD	chr11:66794987-66795998 (-28796), chr11:66796217-66796248 (-28056), chr11:66822298-66823139 (-1570)	3
RHOBTB1	chr10:62870365-62871329 (-166814), chr10:62835146-62836081 (-131581), chr10:62702232-62703259 (+1287)	3
RGR	chr10:86121778-86122417 (+117289), chr10:86167200-86167631 (+162607), chr10:86870714-86871438 (+866267)	3
RGS6	chr14:72105193-72106009 (-293555), chr14:72113604-72114284 (-285212), chr14:72870599-72871282 (+471785)	3
RERG	chr12:15368843-15370207 (+4886), chr12:15341006-15341546 (+33135), chr12:15296334-15297061 (+77713)	3
RFT1	chr3:53189741-53190317 (-25559), chr3:53184078-53184614 (-19876), chr3:53179139-53179751 (-14975)	3
ROCK1	chr18:18767875-18768670 (-76461), chr18:18764263-18764724 (-72682), chr18:18654093-18654595 (+37468)	3
RLBP1	chr15:89693977-89694583 (+70642), chr15:89693785-89693885 (+71087), chr15:89658615-89659327 (+105951)	3
FAM9C	chrX:13082757-13083172 (-20048), chrX:13046837-13048739 (+15129)	2
F8A3	chrX:154216154-154216888 (+101886), chrX:154216996-154217097 (+102412)	2
LDOC1	chrX:140198714-140199069 (+72418), chrX:140197925-140198502 (+73096)	2
TEX13A	chrX:104395184-104395569 (+69981), chrX:104225416-104225833 (+239733)	2
SYTL4	chrX:100000772-100001408 (-14568), chrX:100000499-100000546 (-14001)	2
EFHC2	chrX:44404456-44405469 (-202040), chrX:43897610-43898117 (+305059)	2
EGFL6	chrX:13506111-13506635 (-81321), chrX:13517190-13517767 (-70215)	2
CSTF2	chrX:100000499-100000546 (-74825), chrX:100000772-100001408 (-74258)	2
COL4A6	chrX:107551303-107551604 (+130204), chrX:107550422-107551231 (+130831)	2
APOO	chrX:23919139-23919668 (+6653), chrX:23907107-23907727 (+18640)	2
SPANXA1	chrX:140571153-140571754 (+101406), chrX:140570480-140570930 (+102155)	2
SPANXB2	chrX:140197925-140198502 (+101453), chrX:140198714-140199069 (+102131)	2
SPANXC	chrX:140571153-140571754 (-234808), chrX:140570480-140570930 (-234059)	2
SOX3	chrX:139574262-139574903 (+12642), chrX:139542491-139542858 (+44550)	2
SLITRK4	chrX:142020537-142021275 (+703020), chrX:141982284-141982799 (+741384)	2
CXorf66	chrX:139574262-139574903 (-526906), chrX:139542491-139542858 (-494998)	2
MAGEC2	chrX:142020537-142021275 (-727830), chrX:141982284-141982799 (-689466)	2
SCML1	chrX:17725194-17725626 (-30182), chrX:17753494-17753923 (-1883)	2
ATG4A	chrX:107550422-107551231 (+215928), chrX:107551303-107551604 (+216555)	2
ARMCX1	chrX:100854403-100854972 (+49174), chrX:100868872-100869452 (+63648)	2
ARMCX6	chrX:100868872-100869452 (+3829), chrX:100854403-100854972 (+18303)	2
FUNDC2	chrX:154255016-154255134 (+11), chrX:154256165-154256283 (+1160)	2
FYN	chr6:112360094-112361162 (-319363), chr6:112339849-112340752 (-299036)	2
GAA	chr17:78021026-78021491 (-54096), chr17:78076665-78077252 (+1604)	2
GALNT4	chr12:89960243-89961068 (-42073), chr12:89764224-89764592 (+154175)	2
GDF6	chr8:96237601-96238125 (+935157), chr8:96236110-96236674 (+936628)	2
GBA3	chr4:23328669-23329200 (+634387), chr4:23369752-23370372 (+675514)	2
GLIS3	chr9:3677520-3678297 (+622126), chr9:3676269-3677423 (+623189)	2
GJD4	chr10:35781199-35781916 (-112780), chr10:35782183-35782715 (-111889)	2
GLP1R	chr6:38759938-38760713 (-256231), chr6:38770749-38771349 (-245508)	2
GJB6	chr13:21079659-21080578 (-273585), chr13:20877695-20878243 (-71435)	2
GJA1	chr6:121831812-121832276 (+75299), chr6:122354606-122355004 (+598060)	2
GDNF	chr5:37569427-37569951 (+266240), chr5:37549401-37550417 (+286020)	2
GDPD5	chr11:75133703-75134135 (+102680), chr11:75133059-75133690 (+103224)	2
GHR	chr5:42603484-42604056 (+179893), chr5:42604094-42604824 (+180582)	2
GHSR	chr3:171864142-171864627 (+301861), chr3:171858091-171859208 (+307596)	2
GPRC5C	chr17:72391001-72392047 (-38312), chr17:72426713-72427783 (-2588)	2
GRB10	chr7:51247607-51248492 (-447985), chr7:50838016-50839589 (-38738)	2
GPX3	chr5:150451901-150452360 (+52132), chr5:150458236-150458697 (+58468)	2
GRIA2	chr4:158236438-158236818 (+94892), chr4:158284161-158285011 (+142850)	2
ARHGEF17	chr11:72986336-72986776 (-33107), chr11:73006102-73006559 (-13332)	2
ARHGEF18	chr19:7463508-7464275 (-40682), chr19:7479901-7480044 (-24601)	2
ARHGEF26	chr3:153777533-153778139 (-60956), chr3:153936167-153937051 (+97817)	2
ARHGEF38	chr4:106473007-106473988 (-279), chr4:106506990-106507819 (+33628)	2
ARID1B	chr6:157042496-157042893 (-56369), chr6:157148071-157148950 (+49447)	2
ARID2	chr12:45669925-45670363 (-453476), chr12:45829065-45829513 (-294331)	2
GRIP2	chr3:14455040-14455447 (+128344), chr3:14454170-14455027 (+128989)	2
GRIK1	chr21:30758897-30759637 (+553015), chr21:30750723-30752251 (+560795)	2
GNAQ	chr9:80312591-80312905 (+333471), chr9:80278552-80279142 (+367372)	2
GCH1	chr14:55137083-55137670 (+232165), chr14:55117490-55118326 (+251634)	2
GNA14	chr9:80312591-80312905 (-49516), chr9:80278552-80279142 (-15615)	2
GNS	chr12:65190944-65191370 (-37931), chr12:65019010-65019640 (+133901)	2
GOLPH3	chr5:32233487-32234380 (-59509), chr5:32094062-32094684 (+80052)	2
GPR158	chr10:25672754-25673324 (+208749), chr10:25673418-25673850 (+209344)	2
GPR21	chr9:125811969-125812500 (+15389), chr9:125970949-125971752 (+174505)	2
GPR26	chr10:124986772-124987161 (-438904), chr10:124987255-124987679 (-438404)	2
GPC6	chr13:93978311-93979697 (+99926), chr13:94658523-94659040 (+779704)	2
GPR110	chr6:47015096-47015657 (-5295), chr6:46983761-46984986 (+25708)	2
GPR132	chr14:105510179-105510660 (+21334), chr14:105494349-105495163 (+36998)	2
ARL4A	chr7:12981082-12981568 (+254873), chr7:12982059-12982815 (+255985)	2
ARL4D	chr17:41521398-41521913 (+45303), chr17:41521940-41522717 (+45976)	2
ARPP19	chr15:52948446-52949082 (-87551), chr15:52945860-52946317 (-84876)	2
ARTN	chr1:44236280-44236890 (-162407), chr1:44323845-44324336 (-74901)	2
ATF1	chr12:51007294-51007721 (-150281), chr12:51009421-51010203 (-147977)	2
ATIC	chr2:216031031-216031971 (-145178), chr2:216226534-216226974 (+50075)	2
ATP2B1	chr12:90162827-90163486 (-113313), chr12:89960243-89961068 (+89188)	2
ATP5J	chr21:27539196-27539700 (-431483), chr21:27395036-27395642 (-287374)	2
ATXN10	chr22:46138715-46139061 (+71210), chr22:46213971-46214343 (+146479)	2
ATP6V1H	chr8:54476692-54477449 (+278779), chr8:54411600-54412152 (+343974)	2
BLK	chr8:11429615-11429760 (+78167), chr8:11431049-11431493 (+79750)	2
BICD1	chr12:31973684-31974348 (-286169), chr12:32187105-32187402 (-72931)	2
BMP4	chr14:54404835-54405711 (+15997), chr14:53771725-53772223 (+649296)	2
BLVRA	chr7:43804344-43805044 (+6422), chr7:43847910-43848624 (+49995)	2
BCL10	chr1:85779611-85780049 (-37243), chr1:85763308-85764339 (-21237)	2
BCL2A1	chr15:80258195-80259054 (+5018), chr15:80249558-80250041 (+13843)	2
BCL2L1	chr20:30307167-30308255 (+2945), chr20:30267556-30268594 (+42581)	2
BCAS1	chr20:52468600-52469064 (+218472), chr20:52402557-52403229 (+284411)	2
BANF2	chr20:17875695-17876201 (+201628), chr20:17876775-17877380 (+202758)	2
BBX	chr3:107543366-107543958 (+301879), chr3:107705368-107706481 (+464142)	2
BAG3	chr10:121423493-121424187 (+12958), chr10:121427409-121427849 (+16747)	2
BACH1	chr21:30750723-30752251 (+80267), chr21:30758897-30759637 (+88047)	2
ATXN7	chr3:63918434-63919056 (+34670), chr3:63923326-63924065 (+39621)	2
AUH	chr9:93896924-93897390 (+227049), chr9:93683513-93684121 (+440389)	2
B3GNT5	chr3:183009172-183010052 (+38580), chr3:183012827-183014436 (+42600)	2
B3GNT6	chr11:76747307-76748015 (+2226), chr11:76749291-76750141 (+4281)	2
B3GNTL1	chr17:80989677-80990680 (+19507), chr17:80846693-80848056 (+162311)	2
S100A9	chr1:153336469-153337096 (+6453), chr1:153337297-153338310 (+7474)	2
SCIMP	chr17:5158421-5159159 (-20707), chr17:5131869-5132312 (+5992)	2
SCGB1A1	chr11:62267578-62268223 (+81394), chr11:62275575-62276629 (+89595)	2
SCGB2B2	chr19:35156241-35156582 (-70922), chr19:35135896-35136310 (-50613)	2
SCGB3A1	chr5:180022098-180023322 (-4223), chr5:180005573-180006029 (+12686)	2
SCAP	chr3:47528654-47529143 (-11454), chr3:47485054-47485555 (+32140)	2
SCAPER	chr15:76683481-76684282 (+492335), chr15:76682858-76683326 (+493125)	2
SAMD4A	chr14:55117490-55118326 (+83578), chr14:55137083-55137670 (+103047)	2
SAMD9	chr7:92748247-92748640 (-1108), chr7:92563130-92563851 (+183845)	2
SAMSN1	chr21:16235562-16236196 (-317215), chr21:16084265-16085007 (-165972)	2
SARS	chr1:109693659-109694584 (-62393), chr1:109694724-109695311 (-61497)	2
S100P	chr4:6689682-6690322 (-5564), chr4:6697347-6697902 (+2059)	2
S100A12	chr1:153337297-153338310 (+10271), chr1:153336469-153337096 (+11292)	2
SEPP1	chr5:42604094-42604824 (+207565), chr5:42603484-42604056 (+208254)	2
2009-09-01	chr17:75251354-75251909 (-25860), chr17:75324916-75325387 (+47660)	2
SERGEF	chr11:17833709-17835706 (+199929), chr11:17832750-17833458 (+201533)	2
SERHL2	chr22:42933268-42933832 (-16375), chr22:42935275-42935783 (-14396)	2
2004-09-01	chr17:56716940-56718244 (-110814), chr17:56652848-56653526 (-46409)	2
2005-09-01	chr22:19542246-19542942 (-159393), chr22:19544028-19544507 (-157719)	2
SEMA6A	chr5:116791307-116791721 (-880963), chr5:116194381-116195061 (-284170)	2
SEMA7A	chr15:74823548-74823976 (-97463), chr15:74680232-74680801 (+45782)	2
SENP1	chr12:48416384-48417700 (+82599), chr12:48415384-48416156 (+83871)	2
SENP5	chr3:196514405-196515272 (-79888), chr3:196533865-196535197 (-60196)	2
SEC14L2	chr22:30788840-30789510 (-3755), chr22:30804726-30805170 (+12018)	2
SDHAP1	chr3:195641362-195642337 (+75300), chr3:195632720-195633588 (+83996)	2
SCNN1A	chr12:6481767-6481999 (+2507), chr12:6472929-6473533 (+11159)	2
C13orf15	chr13:42354513-42355893 (+323661), chr13:42356200-42356495 (+324806)	2
C14orf132	chr14:96505147-96505584 (-295), chr14:96531840-96532224 (+26371)	2
BTAF1	chr10:93882649-93883369 (+199273), chr10:93884397-93885135 (+201030)	2
C11orf46	chr11:30382098-30382674 (+37737), chr11:30568548-30569237 (+224244)	2
C11orf9	chr11:61462063-61463355 (-57412), chr11:61464404-61465141 (-55348)	2
C11orf75	chr11:93356193-93356667 (-79884), chr11:93152309-93152635 (+124074)	2
C10orf137	chr10:127313186-127314948 (-94017), chr10:127334799-127335489 (-72940)	2
C10orf76	chr10:103724805-103725435 (+90812), chr10:103653339-103654007 (+162259)	2
BUB3	chr10:124986772-124987161 (+73207), chr10:124987255-124987679 (+73707)	2
BMPR1B	chr4:95848179-95848450 (+169187), chr4:96171831-96172264 (+492920)	2
RPS24	chr10:80349296-80349819 (+556040), chr10:80502443-80502829 (+709118)	2
RPLP0	chr12:120672140-120672982 (-33547), chr12:120669022-120670000 (-30497)	2
C12orf44	chr12:52541042-52541648 (+77587), chr12:52542351-52543037 (+78936)	2
C14orf180	chr14:105049004-105049417 (+3155), chr14:105049718-105050229 (+3918)	2
RRP7A	chr22:42935275-42935783 (-19700), chr22:42933268-42933832 (-17721)	2
TMEM45B	chr11:129688032-129688945 (+2748), chr11:129716205-129717175 (+30949)	2
SLC24A6	chr12:113684310-113684769 (+88385), chr12:113683606-113684114 (+89065)	2
TMEM92	chr17:48344075-48344480 (-4489), chr17:48394247-48395291 (+46002)	2
TMEM57	chr1:25785178-25785652 (+28027), chr1:25802524-25803578 (+45663)	2
TMEM62	chr15:43460430-43460739 (+34863), chr15:43461810-43461897 (+36132)	2
TNIP1	chr5:150458236-150458697 (+8280), chr5:150451901-150452360 (+14616)	2
TNK2	chr3:195641362-195642337 (-19418), chr3:195632720-195633588 (-10722)	2
TNKS1BP1	chr11:57045343-57046107 (+46688), chr11:57018433-57018985 (+73704)	2
TNFRSF13B	chr17:16959390-16959951 (-84269), chr17:16921856-16922338 (-46695)	2
TNFRSF1A	chr12:6481767-6481999 (-30600), chr12:6472929-6473533 (-21948)	2
TNFSF15	chr9:117670120-117671049 (-102177), chr9:117381320-117382120 (+186688)	2
TPCN1	chr12:113683606-113684114 (+24600), chr12:113684310-113684769 (+25280)	2
TPCN2	chr11:68873316-68874383 (+57500), chr11:68889612-68890873 (+73893)	2
TOB2	chr22:41814805-41814870 (+28189), chr22:41813955-41814396 (+28851)	2
TOM1	chr22:35711873-35712173 (+16226), chr22:35755660-35756108 (+60087)	2
TPM1	chr15:63124146-63125087 (-210221), chr15:63311790-63312291 (-22797)	2
TPM4	chr19:16086549-16087040 (-91522), chr19:16114192-16114874 (-63784)	2
TPSD1	chr16:1299577-1299653 (-6658), chr16:1337662-1338346 (+31731)	2
TRAF3	chr14:103158037-103158605 (-85495), chr14:103163289-103163984 (-80179)	2
TRAM1L1	chr4:117598054-117598357 (+408530), chr4:117570857-117571414 (+435600)	2
SHROOM1	chr5:132173471-132173984 (-11726), chr5:132143860-132144907 (+17618)	2
SIM2	chr21:37985196-37985876 (-86455), chr21:38218944-38219756 (+147359)	2
SH3RF2	chr5:145325177-145325942 (+9434), chr5:145361333-145362518 (+45800)	2
SLC13A5	chr17:6589297-6590048 (+27067), chr17:6585417-6585709 (+31177)	2
SLC15A1	chr13:99636343-99636840 (-231663), chr13:99302435-99303086 (+102168)	2
SLC15A5	chr12:16089567-16090201 (+340735), chr12:16077688-16078314 (+352618)	2
SLC16A9	chr10:61639031-61639521 (-169627), chr10:61096889-61097437 (+372486)	2
SLC22A15	chr1:116557790-116558574 (+39063), chr1:116854524-116855031 (+335659)	2
SH3TC2	chr5:148510344-148510992 (-67931), chr5:148508639-148509283 (-66224)	2
SHANK2	chr11:70781404-70781921 (+154179), chr11:70651075-70652731 (+283939)	2
SH2D1B	chr1:162358256-162358592 (+23504), chr1:162135239-162135966 (+246325)	2
SH3BP5	chr3:15405577-15406001 (-31685), chr3:15334209-15335047 (+39476)	2
SERPINB1	chr6:2864065-2864467 (-22185), chr6:2804744-2805130 (+37144)	2
SFI1	chr22:31975758-31976408 (+83822), chr22:31981194-31982871 (+89772)	2
MAN1A2	chr1:117811332-117812093 (-98372), chr1:118105279-118105617 (+195363)	2
MAFF	chr22:38618707-38619696 (+9660), chr22:38624686-38625064 (+15333)	2
LSM14A	chr19:34369311-34370144 (-293624), chr19:34370519-34370659 (-292763)	2
MAL	chr2:95682593-95683013 (-8676), chr2:95685999-95686407 (-5276)	2
MAP6D1	chr3:183562406-183564181 (-19901), chr3:183483104-183483610 (+60036)	2
MAPK13	chr6:36067034-36067447 (-31021), chr6:36086009-36086906 (-11804)	2
MAPK14	chr6:36067034-36067447 (+71787), chr6:36086009-36086906 (+91004)	2
LYPLAL1	chr1:218819496-218820116 (-527386), chr1:219477781-219478416 (+130907)	2
LRRTM3	chr10:68017477-68018167 (-667970), chr10:68874529-68875099 (+189022)	2
LRP12	chr8:106316610-106317388 (-715747), chr8:106306679-106307662 (-705919)	2
LRFN2	chr6:40875079-40875622 (-320225), chr6:40364310-40364893 (+190524)	2
LMO4	chr1:88153457-88154340 (+359748), chr1:88183600-88184618 (+389958)	2
LOC100293516	chr19:58349963-58350688 (+8664), chr19:58351445-58351997 (+10059)	2
LMAN1L	chr15:75108950-75110252 (+4407), chr15:75110929-75111337 (+5939)	2
EEFSEC	chr3:128054274-128054779 (+182214), chr3:128142337-128142840 (+270276)	2
EEA1	chr12:93708036-93708903 (-385363), chr12:93538718-93539461 (-215983)	2
ECT2L	chr6:138903527-138904154 (-213407), chr6:138985123-138985414 (-131979)	2
ECE1	chr1:21602716-21603293 (+13761), chr1:21578171-21578984 (+38188)	2
ECHDC3	chr10:11704651-11705120 (-79470), chr10:11757720-11758420 (-26286)	2
DYRK1A	chr21:38830760-38831499 (+38529), chr21:39018290-39019039 (+226064)	2
DNAJC25	chr9:114601592-114602249 (+208289), chr9:114619742-114620389 (+226434)	2
DSN1	chr20:35475354-35475924 (-73485), chr20:35402762-35403148 (-801)	2
DUSP16	chr12:12735786-12736245 (-20568), chr12:12729070-12729392 (-13783)	2
DPP4	chr2:162762105-162762666 (+168666), chr2:162728585-162729135 (+202192)	2
DPP9	chr19:4717405-4717844 (+6230), chr19:4697419-4697846 (+26222)	2
DRD1	chr5:174345181-174345644 (+525750), chr5:174204058-174204543 (+666862)	2
MCCC2	chr5:70927016-70927540 (+44163), chr5:70927739-70928564 (+45037)	2
MCF2L2	chr3:183012827-183014436 (+132223), chr3:183009172-183010052 (+136243)	2
MDFIC	chr7:115317945-115318674 (+756101), chr7:115480642-115481243 (+918734)	2
MDH2	chr7:75920700-75921604 (+243759), chr7:75922817-75923426 (+245729)	2
MAST4	chr5:66037071-66037673 (+145196), chr5:66450617-66451111 (+558688)	2
MAP2	chr2:210233141-210233525 (-211070), chr2:210233568-210234003 (-210617)	2
MAP1B	chr5:71044318-71044810 (-358554), chr5:71187724-71188268 (-215122)	2
2010-03-01	chr17:60897068-60897705 (-11682), chr17:60803047-60803891 (+82236)	2
MBNL2	chr13:97909935-97910725 (+35756), chr13:97931998-97932661 (+57756)	2
MAT2B	chr5:163043273-163043728 (+110916), chr5:163928132-163928876 (+995919)	2
METAP1D	chr2:172877747-172878275 (+13207), chr2:172903610-172903950 (+38976)	2
MED31	chr17:6589297-6590048 (-34719), chr17:6585417-6585709 (-30609)	2
MEIS1	chr2:66146005-66146417 (-516321), chr2:66354511-66354618 (-307967)	2
METTL11A	chr9:131955411-131956716 (-432371), chr9:132168522-132169129 (-219609)	2
MICAL2	chr11:12269155-12269557 (+137218), chr11:12269753-12270505 (+137991)	2
MICALCL	chr11:12269155-12269557 (-39091), chr11:12269753-12270505 (-38318)	2
MICALL1	chr22:38283515-38284142 (-18326), chr22:38329303-38329638 (+27316)	2
MEAF6	chr1:37999892-38000463 (-19814), chr1:37950201-37950608 (+29959)	2
MLC1	chr22:50465953-50466359 (+57625), chr22:50364318-50364747 (+159248)	2
FMOD	chr1:203391618-203392361 (-71701), chr1:203379264-203380230 (-59458)	2
FOLH1B	chr11:89288832-89289475 (-103311), chr11:89290353-89291036 (-101770)	2
FNDC3B	chr3:171858091-171859208 (+101232), chr3:171864142-171864627 (+106967)	2
FNDC9	chr5:156812024-156812439 (-39503), chr5:156763107-156763504 (+9423)	2
FNIP2	chr4:159726733-159727116 (+36743), chr4:160150273-160150846 (+460378)	2
FOXF2	chr6:1526022-1526406 (+136145), chr6:1577895-1578196 (+187977)	2
FOXK2	chr17:80571701-80572615 (+94564), chr17:80579050-80579583 (+101723)	2
FTH1	chr11:61814178-61814736 (-79325), chr11:61740193-61740722 (-5326)	2
FRMPD2	chr10:49495715-49496499 (-13166), chr10:49220150-49220690 (+262521)	2
FRS2	chr12:69833366-69834817 (-30037), chr12:69899201-69899483 (+35213)	2
MMADHC	chr2:151022734-151023116 (-578595), chr2:150283726-150284317 (+160308)	2
MORF4L1	chr15:79222199-79222729 (+57292), chr15:79223114-79224105 (+58438)	2
MKLN1	chr7:130626541-130627257 (-385696), chr7:131085546-131086323 (+73340)	2
MGP	chr12:15057794-15058194 (-19141), chr12:15057207-15057528 (-18515)	2
MLLT4	chr6:167935068-167935648 (-292313), chr6:168250331-168251062 (+23026)	2
MPP7	chr10:28784997-28786235 (-214549), chr10:28572938-28573557 (-2181)	2
MPPED2	chr11:30568548-30569237 (+33148), chr11:30382098-30382674 (+219655)	2
MPRIP	chr17:16921856-16922338 (-145877), chr17:16959390-16959951 (-108303)	2
CXADR	chr21:18490726-18491363 (-394179), chr21:18895273-18895786 (+10306)	2
CWC15	chr11:94578582-94579378 (+127796), chr11:94565558-94566866 (+140564)	2
PSG4	chr19:43769256-43770307 (-59992), chr19:43754498-43755138 (-45028)	2
PSG9	chr19:43769256-43770307 (+3900), chr19:43754498-43755138 (+18864)	2
CTU2	chr16:88829307-88830558 (+57042), chr16:88831324-88831785 (+58664)	2
CYB5R2	chr11:7621408-7621986 (+73124), chr11:7559883-7560392 (+134683)	2
CYP1B1	chr2:38323225-38323768 (-20174), chr2:38303015-38304114 (-242)	2
CYP2B6	chr19:41468236-41469010 (-28581), chr19:41495022-41495778 (-1804)	2
DCLRE1A	chr10:115686914-115687711 (-73454), chr10:115681483-115682310 (-68038)	2
DDAH1	chr1:85779611-85780049 (+151059), chr1:85763308-85764339 (+167065)	2
DDHD1	chr14:54404835-54405711 (-785227), chr14:53771725-53772223 (-151928)	2
DDX18	chr2:118314294-118314948 (-257634), chr2:118315088-118315665 (-256878)	2
DDX19B	chr16:70424500-70425077 (+91717), chr16:70425263-70425696 (+92408)	2
DCAF17	chr2:172127932-172128362 (-162614), chr2:172128425-172128921 (-162088)	2
DAPL1	chr2:159580072-159581035 (-71275), chr2:159583739-159583748 (-68085)	2
CYP4B1	chr1:47222442-47224145 (-41376), chr1:47273037-47273417 (+8557)	2
CYYR1	chr21:27763157-27763446 (+182279), chr21:27760828-27763135 (+183599)	2
DACT2	chr6:168793759-168794183 (-73569), chr6:168791374-168791941 (-71256)	2
DAGLA	chr11:61462063-61463355 (+14804), chr11:61464404-61465141 (+16868)	2
DNPEP	chr2:220264565-220265380 (-12311), chr2:220263509-220264392 (-11289)	2
DNAJB8	chr3:128142337-128142840 (+43502), chr3:128054274-128054779 (+131564)	2
DNAJB9	chr7:108254225-108254619 (+44233), chr7:108486363-108487421 (+276703)	2
DLL1	chr6:170589117-170589472 (+10402), chr6:170535777-170536376 (+63620)	2
DLX1	chr2:172877747-172878275 (-72197), chr2:172903610-172903950 (-46428)	2
DLX4	chr17:47964375-47965543 (-81603), chr17:47992554-47993444 (-53563)	2
DNAH8	chr6:38759938-38760713 (+77209), chr6:38770749-38771349 (+87932)	2
DFNB31	chr9:117307342-117307895 (-39883), chr9:117163409-117164189 (+103937)	2
DECR1	chr8:91012989-91013351 (-410), chr8:91013445-91014430 (+358)	2
DEGS2	chr14:100622256-100623078 (+3345), chr14:100603348-100604087 (+22294)	2
DENND1B	chr1:197752538-197753233 (-8263), chr1:197632435-197633004 (+111903)	2
DENND5A	chr11:9124874-9125410 (+161731), chr11:9120124-9120638 (+166492)	2
DENND5B	chr12:31803890-31804200 (-60093), chr12:31612808-31613455 (+130820)	2
DEPTOR	chr8:120989746-120990144 (+104045), chr8:120994463-120995622 (+109143)	2
DERA	chr12:16077688-16078314 (+13815), chr12:16089567-16090201 (+25698)	2
DES	chr2:220263509-220264392 (-19148), chr2:220264565-220265380 (-18126)	2
DIP2B	chr12:51007294-51007721 (+108740), chr12:51009421-51010203 (+111044)	2
DIP2C	chr10:592751-593296 (+142584), chr10:500722-501253 (+234620)	2
DIRAS2	chr9:92492352-92492755 (+912554), chr9:92458389-92458757 (+946535)	2
DHX8	chr17:41521398-41521913 (-39678), chr17:41521940-41522717 (-39005)	2
DHRS3	chr1:12692967-12693417 (-15372), chr1:12291127-12291875 (+386319)	2
DISP2	chr15:40626886-40627758 (-23112), chr15:40644766-40645238 (-5432)	2
PPFIA1	chr11:70079185-70080026 (-37200), chr11:70093752-70094312 (-22774)	2
PNPLA2	chr11:819074-819075 (+174), chr11:820182-820353 (+1367)	2
PPARA	chr22:46448110-46448624 (-98132), chr22:46574612-46575061 (+28338)	2
PPFIBP2	chr11:7559883-7560392 (+25137), chr11:7621408-7621986 (+86696)	2
PPIAL4A	chr1:144822069-144823401 (-458489), chr1:144157306-144158204 (+206491)	2
PNPO	chr17:45982667-45983550 (-35780), chr17:46034979-46035475 (+16338)	2
PNPT1	chr2:56066238-56066676 (-145446), chr2:56006730-56007282 (-85995)	2
POLE	chr12:133199483-133200583 (+63912), chr12:133198800-133199355 (+64867)	2
POPDC3	chr6:105821764-105822441 (-194245), chr6:105807771-105808257 (-180156)	2
PLEK2	chr14:67959057-67959650 (-80526), chr14:67909091-67909689 (-30562)	2
PLCB2	chr15:40644766-40645238 (-44828), chr15:40626886-40627758 (-27148)	2
PMP22	chr17:14641198-14641982 (+522503), chr17:14639630-14640522 (+524017)	2
PLEKHA8	chr7:30209937-30210473 (+142228), chr7:30212365-30212958 (+144685)	2
PLEKHA8P1	chr12:45829065-45829513 (-219500), chr12:45669925-45670363 (-60355)	2
PLEKHB1	chr11:73180369-73180976 (-177921), chr11:73205089-73205768 (-153165)	2
PLEKHF1	chr19:30161961-30162957 (+6132), chr19:30176318-30176817 (+20241)	2
PSCA	chr8:143757240-143757879 (-4314), chr8:143758494-143759218 (-3018)	2
PRSS23	chr11:86417023-86417980 (-93989), chr11:86651049-86651570 (+139819)	2
PRSS27	chr16:2794597-2795189 (-24341), chr16:2769108-2769671 (+1162)	2
PRSS38	chr1:228081504-228082123 (+78396), chr1:228083533-228084009 (+80353)	2
PRKAB2	chr1:146585530-146587062 (+57833), chr1:146418439-146419473 (+225173)	2
PROK2	chr3:72170377-72170956 (-336310), chr3:71922141-71922624 (-88026)	2
PROM1	chr4:16142249-16143112 (-64940), chr4:16035533-16036457 (+41746)	2
PROP1	chr5:177507615-177508114 (-84622), chr5:177423915-177424348 (-889)	2
PRAM1	chr19:8524700-8525308 (+42534), chr19:8514744-8515151 (+52590)	2
PRDM15	chr21:43353028-43353457 (-53652), chr21:43203546-43204039 (+95798)	2
PPARGC1A	chr4:23369752-23370372 (+521638), chr4:23328669-23329200 (+562765)	2
PRELP	chr1:203379264-203380230 (-65136), chr1:203391618-203392361 (-52893)	2
PPP2R5E	chr14:64144463-64145172 (-134739), chr14:63971228-63972221 (+38354)	2
PPP1R26	chr9:138283573-138286372 (-86675), chr9:138287026-138287290 (-84490)	2
PPP1R13B	chr14:104203255-104203787 (+110406), chr14:104202572-104203013 (+111134)	2
SLC9A3R1	chr17:72753433-72755191 (+9549), chr17:72765679-72767220 (+21687)	2
SLCO2B1	chr11:75053830-75054464 (+192115), chr11:75054481-75054963 (+192690)	2
SLFNL1	chr1:41512006-41512542 (-24847), chr1:41511384-41511856 (-24193)	2
SMYD2	chr1:214389926-214390654 (-64275), chr1:214612758-214613426 (+158527)	2
SNRPE	chr1:203883391-203883942 (+52927), chr1:203900999-203901730 (+70625)	2
SORCS3	chr10:106239893-106241256 (-160284), chr10:106295684-106296216 (-104909)	2
SOX6	chr11:15639770-15640705 (+784175), chr11:15636817-15637732 (+787138)	2
SNX27	chr1:151519243-151520144 (-64968), chr1:151554386-151554929 (-30004)	2
SOCS2	chr12:93905548-93906110 (-57769), chr12:93935451-93936242 (-27751)	2
SOCS4	chr14:55568664-55569346 (+75161), chr14:55569773-55570590 (+76338)	2
SNAP29	chr22:21221502-21222125 (+8522), chr22:21241602-21242359 (+28689)	2
SNX5	chr20:17876775-17877380 (+72076), chr20:17875695-17876201 (+73206)	2
SLC2A1	chr1:43457835-43458519 (-33330), chr1:43427422-43427827 (-2778)	2
SLC36A4	chr11:93152309-93152635 (-221377), chr11:92930250-92930940 (+500)	2
SLC35F3	chr1:233838569-233839145 (-201822), chr1:233840674-233841477 (-199603)	2
SLC4A10	chr2:162728585-162729135 (+248015), chr2:162762105-162762666 (+281541)	2
SLC25A24	chr1:108779777-108780897 (-37363), chr1:108778005-108778330 (-35194)	2
SLC28A3	chr9:87100480-87100847 (-144970), chr9:86964631-86965068 (-9156)	2
SLC25A33	chr1:9385871-9386284 (-213450), chr1:9444682-9445060 (-154657)	2
CCNK	chr14:100021171-100021932 (+73813), chr14:100044883-100045963 (+97684)	2
CDCA4	chr14:105510179-105510660 (-22995), chr14:105494349-105495163 (-7331)	2
CDK5RAP2	chr9:123333538-123334589 (+8373), chr9:123330993-123331531 (+11175)	2
C2orf49	chr2:105994293-105994725 (+40496), chr2:105994839-105995274 (+41044)	2
C2CD2	chr21:43392979-43393247 (-19114), chr21:43353028-43353457 (+20756)	2
C2CD3	chr11:73848926-73850056 (+32573), chr11:73782314-73782746 (+99534)	2
C20orf3	chr20:24999069-24999495 (-25857), chr20:24997869-24998352 (-24686)	2
C7orf66	chr7:108486363-108487421 (+37745), chr7:108254225-108254619 (+270215)	2
C6orf70	chr6:170535777-170536376 (+384356), chr6:170589117-170589472 (+437574)	2
C5orf38	chr5:2779542-2779997 (+27508), chr5:2802478-2803515 (+50735)	2
C3orf80	chr3:159709821-159710029 (-233498), chr3:159710350-159711037 (-232729)	2
C5orf4	chr5:154224223-154224895 (+5654), chr5:154222440-154222977 (+7504)	2
C5orf43	chr5:60576518-60577276 (-118595), chr5:60470893-60471057 (-12673)	2
CACNG4	chr17:64929357-64930482 (-31060), chr17:64954109-64954729 (-6561)	2
CACNG5	chr17:64929357-64930482 (+56572), chr17:64954109-64954729 (+81071)	2
CALD1	chr7:134373669-134374104 (-90277), chr7:134603874-134604404 (+139975)	2
CAP2	chr6:17389278-17390221 (-3986), chr6:17390291-17390503 (-3339)	2
CALM2	chr2:47270489-47271049 (+132971), chr2:47197824-47198303 (+205676)	2
CAMK1D	chr10:12644983-12645667 (+253742), chr10:12647527-12648154 (+256258)	2
CAMK1G	chr1:209699434-209700030 (-57313), chr1:209719326-209720382 (-37191)	2
C9orf47	chr9:91113702-91114123 (-491865), chr9:91144564-91145563 (-460714)	2
CD2	chr1:117216663-117217158 (-80175), chr1:117217239-117217797 (-79568)	2
CCNY	chr10:35781199-35781916 (+155756), chr10:35782183-35782715 (+156647)	2
CCR6	chr6:167523184-167523608 (-1899), chr6:167533692-167534386 (+8744)	2
CCDC3	chr10:12647527-12648154 (+395863), chr10:12644983-12645667 (+398379)	2
CCND1	chr11:68873316-68874383 (-582023), chr11:68889612-68890873 (-565630)	2
CCNDBP1	chr15:43460430-43460739 (-16881), chr15:43461810-43461897 (-15612)	2
CD46	chr1:207924747-207924759 (-630), chr1:207924926-207925477 (-181)	2
CD47	chr3:107705368-107706481 (+104010), chr3:107543366-107543958 (+266273)	2
CDC42EP4	chr17:71555106-71555725 (-247273), chr17:71304110-71304862 (+3657)	2
CARKD	chr13:111242528-111243394 (-24970), chr13:111252596-111253266 (-15000)	2
CAPN9	chr1:230893816-230894308 (+10932), chr1:230895973-230896434 (+13074)	2
CAPN5	chr11:76747307-76748015 (-30331), chr11:76749291-76750141 (-28276)	2
CASD1	chr7:94106329-94106680 (-32665), chr7:94138555-94139068 (-358)	2
CBFA2T2	chr20:32238610-32239599 (+161177), chr20:32258601-32259128 (+180937)	2
CBFA2T3	chr16:88990008-88990812 (+53094), chr16:88984951-88985996 (+58030)	2
CBR4	chr4:169990991-169991643 (-59849), chr4:169600603-169601528 (+330402)	2
CBWD3	chr9:70843886-70844497 (-12647), chr9:70856339-70856877 (-231)	2
CBWD3	chr9:70843886-70844497 (-354015), chr9:70490278-70490512 (-218)	2
CBX7	chr22:39572923-39572946 (-24397), chr22:39572067-39572645 (-23818)	2
WT1	chr11:32443178-32443627 (+13678), chr11:32442312-32443118 (+14366)	2
ZMYM4	chr1:35729430-35729905 (-4900), chr1:35730379-35730972 (-3892)	2
ZFYVE21	chr14:104202572-104203013 (+20712), chr14:104203255-104203787 (+21440)	2
ZKSCAN1	chr7:99581200-99581754 (-31742), chr7:99620300-99620686 (+7274)	2
ZNF521	chr18:22669952-22670170 (+262153), chr18:22669020-22669761 (+262823)	2
ZNF302	chr19:35135896-35136310 (-32464), chr19:35156241-35156582 (-12155)	2
ZFPM2	chr8:106306679-106307662 (-23976), chr8:106316610-106317388 (-14148)	2
ZDHHC22	chr14:77554531-77555173 (+53282), chr14:77500190-77501002 (+107538)	2
ZDHHC7	chr16:85028243-85028927 (+16556), chr16:84875407-84875993 (+169441)	2
ZDHHC19	chr3:195899646-195900441 (+38256), chr3:195876658-195878034 (+60954)	2
YRDC	chr1:38283193-38283425 (-9444), chr1:38273168-38273589 (+486)	2
YWHAG	chr7:75939327-75940327 (+48515), chr7:75936017-75936901 (+51883)	2
ZNF750	chr17:80989677-80990680 (-192248), chr17:80846693-80848056 (-49444)	2
PIK3AP1	chr10:98623382-98624437 (-143631), chr10:98392564-98393440 (+87277)	2
PHB	chr17:47472176-47472686 (+19811), chr17:47468343-47468828 (+23656)	2
PIEZO1	chr16:88831324-88831785 (+19817), chr16:88829307-88830558 (+21439)	2
PIP5K1C	chr19:3714677-3715025 (-14374), chr19:3712967-3713673 (-12843)	2
PITRM1	chr10:3790110-3790617 (-575331), chr10:3510178-3511691 (-295902)	2
PKHD1	chr6:51756607-51756989 (+195625), chr6:51337267-51337557 (+615011)	2
PIWIL4	chr11:94324251-94324955 (+24129), chr11:94441578-94442322 (+141476)	2
PKN2	chr1:88153457-88154340 (-996023), chr1:88183600-88184618 (-965813)	2
ZNF704	chr8:81877117-81878518 (-90802), chr8:81446396-81447142 (+340247)	2
ZRANB1	chr10:126697196-126697682 (+66747), chr10:126712849-126713357 (+82411)	2
ZNRF1	chr16:75078633-75079460 (+46132), chr16:75087514-75089104 (+55394)	2
ZNRF2	chr7:30209937-30210473 (-113718), chr7:30212365-30212958 (-111261)	2
ZNF652	chr17:47472176-47472686 (-32596), chr17:47468343-47468828 (-28751)	2
ZNF664	chr12:124615140-124615591 (+157604), chr12:124866290-124866686 (+408726)	2
ZNF586	chr19:58309896-58311124 (+29490), chr19:58324417-58325161 (+43769)	2
ZNF587	chr19:58349963-58350688 (-10855), chr19:58351445-58351997 (-9460)	2
XPOT	chr12:64255873-64256492 (-541970), chr12:64474893-64475120 (-323146)	2
YAP1	chr11:101885269-101885708 (-95703), chr11:101991169-101991594 (+10190)	2
XKR7	chr20:30628436-30629057 (+72942), chr20:30629506-30630264 (+74080)	2
XPNPEP1	chr10:111736933-111737751 (-54031), chr10:111662613-111663170 (+20419)	2
XRCC4	chr5:82674475-82674966 (+301404), chr5:82682840-82683469 (+309838)	2
WNT9A	chr1:228083533-228084009 (+51905), chr1:228081504-228082123 (+53862)	2
WDYHV1	chr8:124417681-124418064 (-11092), chr8:124548708-124549230 (+120004)	2
WISP3	chr6:112339849-112340752 (-35070), chr6:112360094-112361162 (-14743)	2
WNK1	chr12:834126-834834 (-27609), chr12:853017-853643 (-8759)	2
WDR45L	chr17:80579050-80579583 (+27094), chr17:80571701-80572615 (+34253)	2
VPS13C	chr15:62042342-62043192 (+309897), chr15:61714036-61714388 (+638452)	2
VSX1	chr20:25159324-25159534 (-96662), chr20:25158496-25159113 (-96038)	2
VWC2L	chr2:215242903-215244864 (-32577), chr2:215259646-215260269 (-16503)	2
VPS37B	chr12:123372734-123373616 (+7537), chr12:123349007-123349412 (+31502)	2
SPRY4	chr5:141660494-141661149 (+43798), chr5:141600656-141601358 (+103613)	2
SPSB1	chr1:9385871-9386284 (+33137), chr1:9444682-9445060 (+91930)	2
SPOCK1	chr5:136108360-136109399 (+726138), chr5:136059158-136060517 (+775180)	2
SPON1	chr11:13808195-13808643 (-175765), chr11:14276057-14276953 (+292321)	2
SPESP1	chr15:69292607-69293210 (+70070), chr15:69294169-69294645 (+71568)	2
SPINK14	chr5:147451631-147452064 (-97448), chr5:147524730-147526009 (-23926)	2
SPINK4	chr9:33220587-33222498 (-18653), chr9:33235965-33236450 (-3988)	2
SPINK5	chr5:147451631-147452064 (+8313), chr5:147524730-147526009 (+81835)	2
SPTSSB	chr3:161138158-161139092 (-48754), chr3:161129788-161130702 (-40374)	2
SQRDL	chr15:45941086-45941502 (+14038), chr15:45952435-45953312 (+25618)	2
SRGAP3	chr3:9236001-9236821 (+54900), chr3:9217076-9217560 (+73993)	2
SPDEF	chr6:34566435-34567064 (-42640), chr6:34504196-34504839 (+19592)	2
VCAN	chr5:82674475-82674966 (-92772), chr5:82682840-82683469 (-84338)	2
VDAC1	chr5:133372704-133373437 (-32247), chr5:133329172-133329832 (+11322)	2
SSR3	chr3:155935287-155935979 (+337340), chr3:155935028-155935145 (+337886)	2
SRRM2	chr16:2794597-2795189 (-7437), chr16:2818549-2819015 (+16452)	2
SSR1	chr6:7206360-7206924 (+106899), chr6:7198171-7198956 (+114977)	2
ST6GALNAC1	chr17:74641449-74641971 (-1816), chr17:74637606-74638063 (+2059)	2
ST3GAL2	chr16:70425263-70425696 (+47511), chr16:70424500-70425077 (+48202)	2
ST3GAL3	chr1:44236280-44236890 (+63367), chr1:44323845-44324336 (+150873)	2
AP2B1	chr17:34043932-34044688 (+130028), chr17:34046877-34047557 (+132935)	2
APLNR	chr11:57045343-57046107 (-40798), chr11:57018433-57018985 (-13782)	2
ARAP1	chr11:72498324-72498875 (-35166), chr11:72496878-72498110 (-34060)	2
ARFGAP3	chr22:43391077-43391701 (-137981), chr22:43196856-43197194 (+56383)	2
ANKRD46	chr8:101483930-101485152 (+87471), chr8:101429391-101429893 (+142370)	2
AQP7	chr9:33372965-33373380 (+29344), chr9:33328678-33329749 (+73303)	2
AQP8	chr16:25129927-25130326 (-98158), chr16:25130369-25131410 (-97395)	2
ARHGAP29	chr1:94791125-94791627 (-88069), chr1:94715897-94716263 (-12773)	2
MPZL1	chr1:167535111-167535824 (-155719), chr1:167880387-167881247 (+189630)	2
MREG	chr2:216847014-216848214 (+30732), chr2:216838137-216838553 (+40001)	2
MRFAP1	chr4:6634710-6635532 (-7324), chr4:6689682-6690322 (+47557)	2
MSR1	chr8:15525425-15525641 (+524767), chr8:15422115-15422646 (+627919)	2
MRPL42	chr12:93905548-93906110 (+44563), chr12:93935451-93936242 (+74581)	2
MRPS24	chr7:43847910-43848624 (+60878), chr7:43804344-43805044 (+104451)	2
MUSK	chr9:113352869-113353639 (-77797), chr9:113798335-113799179 (+367706)	2
MYRIP	chr3:39983341-39983822 (+132279), chr3:40024460-40025317 (+173586)	2
MYO3A	chr10:25672754-25673324 (-549963), chr10:25673418-25673850 (-549368)	2
MYOG	chr1:203069515-203070099 (-14430), chr1:203058015-203059228 (-3245)	2
NBEA	chr13:34698758-34699366 (-817362), chr13:34921884-34922283 (-594340)	2
NBPF6	chr1:108924214-108925348 (-68123), chr1:108998743-108999666 (+6301)	2
NBPF15	chr1:148328955-148330058 (-231340), chr1:148588030-148589084 (+27710)	2
MTX2	chr2:177710210-177710968 (+576466), chr2:177714490-177715401 (+580823)	2
MTX3	chr5:79251857-79252460 (+34929), chr5:79250472-79251012 (+36346)	2
MYBPC1	chr12:102002062-102002657 (+13651), chr12:102009736-102010322 (+21320)	2
MYCBP2	chr13:77992037-77992389 (-91036), chr13:77629304-77629974 (+271538)	2
MTPN	chr7:135459008-135459498 (+202951), chr7:135458180-135458684 (+203772)	2
MTSS1	chr8:125868733-125869847 (-128560), chr8:125575408-125576308 (+164872)	2
MTMR12	chr5:32331118-32332029 (-18460), chr5:32233487-32234380 (+79180)	2
MS4A6E	chr11:60137461-60138992 (+35872), chr11:60139281-60139335 (+36953)	2
MSX1	chr4:4627110-4627716 (-233979), chr4:4645433-4646022 (-215664)	2
MTDH	chr8:98360625-98360650 (-295769), chr8:98361074-98361551 (-295094)	2
MTERFD3	chr12:107421130-107421879 (-40576), chr12:107420914-107420983 (-40020)	2
ADRA1B	chr5:158837268-158837919 (-506146), chr5:158945199-158946250 (-398015)	2
ADRA2A	chr10:112866796-112867268 (+30242), chr10:112867446-112867711 (+30789)	2
AGK	chr7:141160966-141161476 (-89857), chr7:141395544-141396179 (+144784)	2
AHNAK	chr11:62275575-62276629 (+38230), chr11:62267578-62268223 (+46431)	2
AL157440	chr10:88767999-88768636 (-37747), chr10:88767021-88767930 (-36905)	2
AKAP6	chr14:32780380-32781246 (-17666), chr14:32978639-32979489 (+180585)	2
AKAP10	chr17:19846689-19847663 (+33953), chr17:19840771-19841307 (+40090)	2
ALG14	chr1:95479608-95480041 (+58682), chr1:95459112-95460230 (+78836)	2
ALCAM	chr3:104329617-104329878 (-755809), chr3:104330040-104330578 (-755248)	2
AMBP	chr9:116845715-116845747 (-4979), chr9:116843038-116843951 (-2743)	2
AMBRA1	chr11:46510829-46511857 (+101571), chr11:46493532-46494165 (+119065)	2
ABLIM3	chr5:148508639-148509283 (-12093), chr5:148510344-148510992 (-10386)	2
ACBD5	chr10:27532583-27532800 (-2884), chr10:27531942-27532349 (-2338)	2
ACOT4	chr14:74041612-74042405 (-16401), chr14:74077305-74077901 (+19193)	2
ACOT6	chr14:74077305-74077901 (-5945), chr14:74080175-74080628 (-3146)	2
ACSM1	chr16:20715557-20716008 (-13205), chr16:20598778-20599535 (+103421)	2
ABCC12	chr16:48264550-48264602 (-83895), chr16:48199184-48199790 (-18806)	2
ABCA12	chr2:216031031-216031971 (-28350), chr2:216002791-216002945 (+283)	2
AASDHPPT	chr11:106042867-106043907 (+95095), chr11:106044608-106045458 (+96741)	2
ABHD12	chr20:25334554-25335226 (+36728), chr20:25262254-25262678 (+109152)	2
ACTR6	chr12:100532171-100532633 (-62172), chr12:100623634-100624124 (+29305)	2
ADK	chr10:75949567-75950187 (+38934), chr10:76502955-76503638 (+592354)	2
ACSS1	chr20:24999069-24999495 (+39536), chr20:24997869-24998352 (+40707)	2
GUCY1A2	chr11:106044608-106045458 (+844138), chr11:106042867-106043907 (+845784)	2
GUCY2D	chr17:7854987-7855527 (-50731), chr17:7861030-7861339 (-44803)	2
GSTM3	chr1:110267587-110269017 (+15358), chr1:110266696-110267384 (+16620)	2
GSTM5	chr1:110266696-110267384 (+12176), chr1:110267587-110269017 (+13438)	2
NOX4	chr11:89290353-89291036 (-66042), chr11:89288832-89289475 (-64501)	2
GSG1	chr12:13288250-13289053 (-32022), chr12:13255027-13255409 (+1412)	2
GTDC1	chr2:144092166-144093010 (+997495), chr2:144090765-144091580 (+998910)	2
HEY2	chr6:125905681-125906300 (-164741), chr6:125906431-125906700 (-164166)	2
HHIPL1	chr14:100021171-100021932 (-89928), chr14:100044883-100045963 (-66057)	2
HADH	chr4:108974526-108975102 (+63944), chr4:108979791-108980339 (+69195)	2
HCK	chr20:30628436-30629057 (-11244), chr20:30629506-30630264 (-10106)	2
NOS1AP	chr1:162135239-162135966 (+96022), chr1:162358256-162358592 (+318843)	2
NMUR1	chr2:232384704-232385010 (+10325), chr2:232384016-232384636 (+10856)	2
NHLRC3	chr13:40084296-40084907 (+472147), chr13:40086609-40087249 (+474474)	2
NFIB	chr9:14326127-14326864 (-12451), chr9:14250981-14251800 (+62654)	2
NFIC	chr19:3336439-3337447 (-29622), chr19:3402418-3402696 (+35992)	2
NFRKB	chr11:129716205-129717175 (+46214), chr11:129688032-129688945 (+74415)	2
NFX1	chr9:33328678-33329749 (+38796), chr9:33372965-33373380 (+82755)	2
NECAB3	chr20:32258601-32259128 (+3399), chr20:32238610-32239599 (+23159)	2
NDST4	chr4:116585195-116585890 (-550511), chr4:116576677-116577230 (-541922)	2
NCKAP5	chr2:134399050-134399482 (-73235), chr2:134262040-134263161 (+63430)	2
NCL	chr2:232384704-232385010 (-55652), chr2:232384016-232384636 (-55121)	2
NDFIP1	chr5:141600656-141601358 (+112683), chr5:141660494-141661149 (+172498)	2
NDFIP2	chr13:80706857-80707180 (+651760), chr13:80813783-80814464 (+758865)	2
NDUFB7	chr19:14667570-14667637 (+15285), chr19:14664396-14664462 (+18460)	2
HIVEP1	chr6:12275263-12275946 (+262881), chr6:12283977-12284517 (+271523)	2
HMOX1	chr22:35711873-35712173 (-65037), chr22:35755660-35756108 (-21176)	2
HNRNPL	chr19:39328197-39329084 (+11976), chr19:39321812-39322173 (+18624)	2
HNRNPM	chr19:8514744-8515151 (+5145), chr19:8524700-8525308 (+15201)	2
HOOK3	chr8:42748344-42749877 (-2922), chr8:42764720-42765205 (+12930)	2
HORMAD2	chr22:30440074-30440832 (-36000), chr22:30608423-30609184 (+132351)	2
HPCAL1	chr2:10405834-10406215 (-37015), chr2:10545424-10545934 (+102639)	2
HNRNPA3	chr2:177710210-177710968 (-366833), chr2:177714490-177715401 (-362476)	2
HPSE2	chr10:101034929-101035461 (-39563), chr10:100253938-100254453 (+741436)	2
HIP1R	chr12:123349007-123349412 (+29171), chr12:123372734-123373616 (+53136)	2
HTR4	chr5:147777815-147778558 (+238437), chr5:147774101-147774412 (+242367)	2
ICOS	chr2:204974248-204974825 (+173066), chr2:204979459-204980129 (+178323)	2
HS3ST2	chr16:23104105-23104495 (+278440), chr16:23149051-23149738 (+323535)	2
HRH4	chr18:22669020-22669761 (+628798), chr18:22669952-22670170 (+629468)	2
HSPA9	chr5:138060769-138061248 (-149691), chr5:137944749-137945606 (-33860)	2
HS6ST1	chr2:129886460-129887002 (-810560), chr2:129861437-129862457 (-785776)	2
HSF2	chr6:121831812-121832276 (-888652), chr6:122354606-122355004 (-365891)	2
HSP90AB4P	chr15:58820362-58820727 (+164779), chr15:58768986-58769383 (+216139)	2
HSP90B3P	chr1:92045415-92045743 (-54989), chr1:92202312-92203203 (+102190)	2
IGHE	chr14:106207814-106208376 (+121367), chr14:106090784-106091373 (+238383)	2
INPP5F	chr10:121423493-121424187 (-61719), chr10:121427409-121427849 (-57930)	2
IL1RN	chr2:113836628-113837229 (-48209), chr2:113916377-113917043 (+31572)	2
IL20	chr1:207015153-207015749 (-23703), chr1:207016776-207017670 (-21931)	2
IGSF3	chr1:117217239-117217797 (-7204), chr1:117216663-117217158 (-6597)	2
IGFBP3	chr7:46926056-46926631 (-965473), chr7:46924580-46925261 (-964050)	2
IFT122	chr3:129228501-129229115 (+69840), chr3:129231422-129231981 (+72734)	2
IL12B	chr5:158945199-158946250 (-188244), chr5:158837268-158837919 (-80113)	2
IQGAP1	chr15:91020652-91021259 (+89483), chr15:91022832-91023291 (+91589)	2
INCENP	chr11:61740193-61740722 (-150987), chr11:61814178-61814736 (-76988)	2
INHBA	chr7:42195992-42196421 (-453501), chr7:41995284-41995903 (-252888)	2
INSR	chr19:7479901-7480044 (-185962), chr19:7463508-7464275 (-169881)	2
C19orf10	chr19:4717405-4717844 (-47210), chr19:4697419-4697846 (-27218)	2
C19orf12	chr19:30176318-30176817 (+29395), chr19:30161961-30162957 (+43504)	2
COL2A1	chr12:48416384-48417700 (-18757), chr12:48415384-48416156 (-17485)	2
COL4A2	chr13:111100550-111101349 (+141319), chr13:111199202-111199699 (+239820)	2
COPS8	chr2:237897295-237897693 (-96590), chr2:238143775-238144733 (+150170)	2
COL14A1	chr8:120989746-120990144 (-147407), chr8:120994463-120995622 (-142309)	2
COL18A1	chr21:46841325-46841936 (-33793), chr21:46933338-46933838 (+58164)	2
CNTROB	chr17:7854987-7855527 (+19815), chr17:7861030-7861339 (+25743)	2
CPEB3	chr10:93884397-93885135 (+166109), chr10:93882649-93883369 (+167866)	2
CPEB4	chr5:173193285-173193936 (-121720), chr5:173249425-173249927 (-65655)	2
COX10	chr17:13956361-13956856 (-16110), chr17:14109266-14109778 (+136803)	2
COX4I2	chr20:30267556-30268594 (+42384), chr20:30307167-30308255 (+82020)	2
COX7A2L	chr2:42510705-42511149 (+78061), chr2:42476582-42476909 (+112242)	2
CLDN5	chr22:19544028-19544507 (-31408), chr22:19542246-19542942 (-29734)	2
CMYA5	chr5:79250472-79251012 (+265083), chr5:79251857-79252460 (+266500)	2
CNIH3	chr1:224637955-224639190 (-165606), chr1:224641816-224642875 (-161833)	2
CNN3	chr1:95479608-95480041 (-87090), chr1:95459112-95460230 (-66936)	2
CENPF	chr1:214809374-214809981 (+33146), chr1:214810283-214811511 (+34365)	2
CEP120	chr5:122774568-122775256 (-15626), chr5:122490912-122491729 (+267965)	2
PFN2	chr3:150035303-150035770 (-346796), chr3:149788968-149789495 (-100491)	2
CHRM4	chr11:46510829-46511857 (-103236), chr11:46493532-46494165 (-85742)	2
CKAP4	chr12:106629439-106629973 (+12007), chr12:106589383-106589837 (+52103)	2
CHMP4B	chr20:32321456-32322353 (-77205), chr20:32403409-32403911 (+4550)	2
CHMP6	chr17:78734313-78734853 (-231058), chr17:78961868-78962458 (-3478)	2
CHPT1	chr12:102002062-102002657 (-89057), chr12:102009736-102010322 (-81388)	2
CERS5	chr12:50645696-50646163 (-84833), chr12:50581913-50582520 (-21120)	2
CSRNP1	chr3:39174148-39174761 (+20647), chr3:39172013-39172477 (+22857)	2
CTAGE1	chr18:20193243-20193850 (-195669), chr18:20188815-20189181 (-191120)	2
CREBL2	chr12:12729070-12729392 (-35600), chr12:12735786-12736245 (-28815)	2
CRIM1	chr2:36588071-36588483 (+4907), chr2:36598703-36599571 (+15767)	2
CRYL1	chr13:21079659-21080578 (+19893), chr13:20877695-20878243 (+222043)	2
CRNKL1	chr20:20185726-20186456 (-149401), chr20:20177318-20177664 (-140801)	2
CRTC3	chr15:91020652-91021259 (-52242), chr15:91022832-91023291 (-50136)	2
CRY1	chr12:107421130-107421879 (+66093), chr12:107420914-107420983 (+66649)	2
CPVL	chr7:29139945-29140568 (+45896), chr7:29037665-29038353 (+148144)	2
CTNNA1	chr5:137944749-137945606 (-143929), chr5:138060769-138061248 (-28098)	2
CRISP2	chr6:49644279-49644977 (+36671), chr6:49635544-49636448 (+45303)	2
CTDSPL	chr3:37794728-37795270 (-108670), chr3:37905665-37906197 (+2262)	2
CTGF	chr6:132165322-132165814 (+106950), chr6:132144448-132144876 (+127856)	2
CTH	chr1:71339634-71340332 (+463082), chr1:71340355-71340598 (+463576)	2
CTSH	chr15:79223114-79224105 (+13810), chr15:79222199-79222729 (+14956)	2
IRX1	chr5:2779542-2779997 (-816398), chr5:2802478-2803515 (-793171)	2
ISL2	chr15:76682858-76683326 (+53945), chr15:76683481-76684282 (+54735)	2
ISYNA1	chr19:18557426-18558435 (-8820), chr19:18551809-18552257 (-2922)	2
ITPRIP	chr10:106295684-106296216 (-202287), chr10:106239893-106241256 (-146912)	2
ITGB6	chr2:161078328-161078624 (-21887), chr2:161022479-161022992 (+33853)	2
KCNJ6	chr21:39018290-39019039 (+270031), chr21:38830760-38831499 (+457566)	2
KCNK1	chr1:233838569-233839145 (+89107), chr1:233840674-233841477 (+91326)	2
KCNH7	chr2:164225485-164226061 (-530516), chr2:164224263-164224842 (-529296)	2
KCNAB1	chr3:155935028-155935145 (+96750), chr3:155935287-155935979 (+97296)	2
JAK2	chr9:4864213-4864707 (-120785), chr9:4866083-4866885 (-118761)	2
JARID2	chr6:15089756-15090779 (-156259), chr6:15221928-15222624 (-24251)	2
JAZF1	chr7:28076268-28077207 (+143699), chr7:28074155-28074773 (+145973)	2
KALRN	chr3:124017787-124018192 (+204432), chr3:124035719-124036560 (+222582)	2
KAT6B	chr10:75949567-75950187 (-636502), chr10:76502955-76503638 (-83082)	2
KCNC1	chr11:17832750-17833458 (+75609), chr11:17833709-17835706 (+77213)	2
KCNC4	chr1:110778262-110779173 (+25382), chr1:110867263-110867653 (+114122)	2
KCTD6	chr3:58452389-58453412 (-24922), chr3:58504075-58504544 (+26487)	2
KCNK9	chr8:141185784-141186779 (-470983), chr8:140920761-140921169 (-205666)	2
KCTD15	chr19:34369311-34370144 (+81977), chr19:34370519-34370659 (+82838)	2
CTTN	chr11:70651075-70652731 (+407291), chr11:70781404-70781921 (+537051)	2
KIAA0564	chr13:42356200-42356495 (+178873), chr13:42354513-42355893 (+180018)	2
KIAA1024	chr15:79755662-79756312 (+31129), chr15:79890930-79891467 (+166341)	2
USP31	chr16:23149051-23149738 (+11196), chr16:23104105-23104495 (+56291)	2
UPP2	chr2:158988547-158989087 (+137126), chr2:159045890-159046498 (+194503)	2
UNC5C	chr4:96171831-96172264 (+298313), chr4:95848179-95848450 (+622046)	2
UNC5D	chr8:35574130-35575028 (+481604), chr8:35756882-35757316 (+664124)	2
UHRF1	chr19:4914783-4915555 (+5659), chr19:4939343-4939815 (+30069)	2
ULK2	chr17:19846689-19847663 (-75937), chr17:19840771-19841307 (-69800)	2
UCP3	chr11:73848926-73850056 (-129209), chr11:73782314-73782746 (-62248)	2
NTN4	chr12:96155809-96156325 (+28469), chr12:96111632-96112368 (+72536)	2
USP44	chr12:96155809-96156325 (-213447), chr12:96111632-96112368 (-169380)	2
USP6NL	chr10:11757720-11758420 (-183796), chr10:11704651-11705120 (-130612)	2
UTRN	chr6:145432308-145433077 (+819820), chr6:145510927-145511386 (+898284)	2
NR2F1	chr5:91977145-91977461 (-941740), chr5:92375493-92376120 (-543236)	2
NR5A2	chr1:199985762-199986586 (-10596), chr1:200083487-200084194 (+87071)	2
TSC22D2	chr3:149788968-149789495 (-337556), chr3:150035303-150035770 (-91251)	2
TSEN15	chr1:184591340-184591835 (+570777), chr1:184601870-184602400 (+581324)	2
TSN	chr2:123439204-123439695 (+926329), chr2:123440487-123441499 (+927872)	2
TTC13	chr1:230895973-230896434 (+218414), chr1:230893816-230894308 (+220556)	2
TRIM44	chr11:35642598-35643585 (-41261), chr11:35643612-35643794 (-40650)	2
TRIM14	chr9:100908536-100909098 (-27329), chr9:100834499-100835653 (+46412)	2
TRH	chr3:129627091-129627708 (-65714), chr3:129631555-129632076 (-61298)	2
TRIL	chr7:29139945-29140568 (-142228), chr7:29037665-29038353 (-39980)	2
TRPC7	chr5:136108360-136109399 (-407716), chr5:136059158-136060517 (-358674)	2
TRAPPC9	chr8:141185784-141186779 (+282396), chr8:140920761-140921169 (+547713)	2
UBC	chr12:125412237-125413560 (-13312), chr12:125389224-125389731 (+10109)	2
TUSC3	chr8:15422115-15422646 (+24785), chr8:15525425-15525641 (+127937)	2
TTC6	chr14:38111399-38111879 (-152836), chr14:38279570-38280133 (+15377)	2
TTC7A	chr2:47197824-47198303 (+29751), chr2:47270489-47271049 (+102456)	2
TSPAN5	chr4:99538918-99539513 (+40596), chr4:99493736-99494161 (+85863)	2
TTC21A	chr3:39172013-39172477 (+23093), chr3:39174148-39174761 (+25303)	2
PDE4D	chr5:59664030-59664420 (-474604), chr5:58844619-58845163 (+344730)	2
PDZK1	chr1:146233243-146234363 (-299296), chr1:146039749-146040890 (-105813)	2
PEBP4	chr8:22596255-22597176 (+188705), chr8:22592223-22592936 (+192841)	2
PDPR	chr16:70170085-70171115 (+23071), chr16:70195952-70196490 (+48692)	2
OSBPL3	chr7:24935334-24936005 (+84090), chr7:24897617-24898343 (+121780)	2
PAK2	chr3:196514405-196515272 (+48111), chr3:196533865-196535197 (+67803)	2
PAMR1	chr11:35589080-35590056 (-42392), chr11:35575292-35575992 (-28466)	2
PAPSS2	chr10:89348884-89349908 (-70080), chr10:89407818-89408163 (-11485)	2
PBX1	chr1:164449932-164450580 (-78341), chr1:164548560-164549047 (+20207)	2
PAWR	chr12:80101268-80102008 (-16848), chr12:79941206-79942129 (+143122)	2
PAX1	chr20:21642011-21642981 (-43801), chr20:21923348-21923750 (+237252)	2
PARD3B	chr2:204974248-204974825 (-435979), chr2:204979459-204980129 (-430722)	2
PCTP	chr17:54249408-54249415 (+421072), chr17:54249852-54250442 (+421807)	2
OPRK1	chr8:54476692-54477449 (-312877), chr8:54411600-54412152 (-247682)	2
ONECUT1	chr15:52948446-52949082 (+133445), chr15:52945860-52946317 (+136120)	2
NTRK2	chr9:86964631-86965068 (-318616), chr9:87100480-87100847 (-182802)	2
OGFRL1	chr6:72074686-72075268 (+76500), chr6:72075476-72075539 (+77031)	2
OLFM1	chr9:138283573-138286372 (+317884), chr9:138287026-138287290 (+320069)	2
NUP155	chr5:37569427-37569951 (-198492), chr5:37549401-37550417 (-178712)	2
PADI6	chr1:17640966-17641760 (-57378), chr1:17754661-17755504 (+56342)	2
P2RY2	chr11:72904711-72906279 (-23849), chr11:72906353-72906994 (-22670)	2
P2RY6	chr11:72986336-72986776 (+3309), chr11:73006102-73006559 (+23084)	2
PABPN1L	chr16:88990008-88990812 (-57342), chr16:88984951-88985996 (-52406)	2
P2RY1	chr3:152687644-152688123 (+135148), chr3:152858208-152858814 (+305775)	2
OTOL1	chr3:161129788-161130702 (-84351), chr3:161138158-161139092 (-75971)	2
OR10H4	chr19:16086549-16087040 (+26977), chr19:16114192-16114874 (+54715)	2
TMEM184B	chr22:38624686-38625064 (+43795), chr22:38618707-38619696 (+49468)	2
TMEM26	chr10:62870365-62871329 (+342361), chr10:62835146-62836081 (+377594)	2
TMEM179	chr14:105049718-105050229 (+21123), chr14:105049004-105049417 (+21886)	2
TMEM2	chr9:74398191-74398535 (-14563), chr9:74397387-74397841 (-13814)	2
TMEM108	chr3:132577249-132577874 (-179609), chr3:133105597-133105890 (+348573)	2
TMEM121	chr14:106090784-106091373 (+98126), chr14:106207814-106208376 (+215142)	2
TMEM125	chr1:43672469-43672962 (-62949), chr1:43701424-43701803 (-34051)	2
TLK1	chr2:172128425-172128921 (-40849), chr2:172127932-172128362 (-40323)	2
TJP3	chr19:3712967-3713673 (-15054), chr19:3714677-3715025 (-13523)	2
TBC1D22A	chr22:47331839-47332281 (+173542), chr22:47332433-47332903 (+174150)	2
TAX1BP1	chr7:28074155-28074773 (+294750), chr7:28076268-28077207 (+297024)	2
TBC1D30	chr12:65190944-65191370 (-27195), chr12:65283287-65284127 (+65355)	2
TBC1D7	chr6:12845294-12845447 (+483416), chr6:12844049-12845286 (+484119)	2
TEX14	chr17:56716940-56718244 (+51824), chr17:56652848-56653526 (+116229)	2
TEF	chr22:41813955-41814396 (+36213), chr22:41814805-41814870 (+36875)	2
TESC	chr12:117567819-117568456 (-30887), chr12:117417815-117418307 (+119190)	2
TBCEL	chr11:120685356-120686135 (-209067), chr11:120686309-120686963 (-208177)	2
TC2N	chr14:92343732-92344208 (-41121), chr14:92295766-92296317 (+6807)	2
TECR	chr19:14664396-14664462 (+24050), chr19:14667570-14667637 (+27225)	2
TECRL	chr4:65005347-65006049 (+269480), chr4:65004594-65005229 (+270266)	2
TFAP2B	chr6:51337267-51337557 (+550973), chr6:51756607-51756989 (+970359)	2
TFEC	chr7:115480642-115481243 (+189924), chr7:115317945-115318674 (+352557)	2
TFRC	chr3:195899646-195900441 (-91012), chr3:195876658-195878034 (-68314)	2
LDHD	chr16:75087514-75089104 (+62361), chr16:75078633-75079460 (+71623)	2
LARP1	chr5:154222440-154222977 (+130247), chr5:154224223-154224895 (+132097)	2
KTN1	chr14:56007776-56008367 (-38853), chr14:56207124-56207871 (+160573)	2
LARS	chr5:145361333-145362518 (+200368), chr5:145325177-145325942 (+236734)	2
KRT9	chr17:39695167-39696000 (+32726), chr17:39686406-39687404 (+41405)	2
KRTAP17-1	chr17:39498228-39498768 (-26551), chr17:39495094-39495621 (-23411)	2
KRT31	chr17:39577186-39578307 (-23903), chr17:39571355-39574480 (-19074)	2
KRT33A	chr17:39498228-39498768 (+8558), chr17:39495094-39495621 (+11698)	2
KRT37	chr17:39577186-39578307 (+3075), chr17:39571355-39574480 (+7904)	2
KRT73	chr12:53025122-53025629 (-13033), chr12:53024488-53024982 (-12392)	2
KRT80	chr12:52542351-52543037 (+43090), chr12:52541042-52541648 (+44439)	2
KRT13	chr17:39663763-39664381 (-2207), chr17:39661891-39663497 (-829)	2
KRT18	chr12:53363413-53364676 (+21202), chr12:53365027-53366192 (+22767)	2
KRT2	chr12:53025122-53025629 (+20583), chr12:53024488-53024982 (+21224)	2
KRT20	chr17:39066117-39067261 (-25194), chr17:39059441-39060341 (-18396)	2
KRT23	chr17:39066117-39067261 (+27147), chr17:39059441-39060341 (+33945)	2
KLK13	chr19:51573698-51574885 (-5925), chr19:51547405-51548200 (+20564)	2
LIPC	chr15:58768986-58769383 (+45010), chr15:58820362-58820727 (+96370)	2
LIMA1	chr12:50645696-50646163 (+31423), chr12:50581913-50582520 (+95136)	2
LIMCH1	chr4:41321003-41321998 (-41303), chr4:41613833-41614183 (+251204)	2
LIMS1	chr2:109249226-109249471 (-21919), chr2:109305331-109306053 (+34424)	2
LHX6	chr9:125010667-125011389 (-19937), chr9:124967385-124967868 (+23464)	2
LGALS3	chr14:55568664-55569346 (-26930), chr14:55569773-55570590 (-25753)	2
LGALS4	chr19:39328197-39329084 (-24901), chr19:39321812-39322173 (-18253)	2
LHFP	chr13:40086609-40087249 (+90427), chr13:40084296-40084907 (+92754)	2
STK39	chr2:169288138-169288591 (-184260), chr2:168994282-168994484 (+109722)	2
STX18	chr4:4645433-4646022 (-101953), chr4:4627110-4627716 (-83638)	2
TAGAP	chr6:159302225-159302682 (+163730), chr6:159282678-159283110 (+183290)	2
TAC4	chr17:47992554-47993444 (-67620), chr17:47964375-47965543 (-39580)	2
SYT12	chr11:66794987-66795998 (+4677), chr11:66796217-66796248 (+5417)	2
SUSD3	chr9:95750400-95751267 (-70155), chr9:95751625-95751714 (-69319)	2
SYK	chr9:93683513-93684121 (+119805), chr9:93896924-93897390 (+333145)	2
SYNDIG1	chr20:24078059-24078131 (-371740), chr20:24630420-24631188 (+180969)	2
SYNPO	chr5:149889822-149890483 (-90489), chr5:149891581-149892430 (-88636)	2
EXOSC6	chr16:70195952-70196490 (+89612), chr16:70170085-70171115 (+115233)	2
FAM108B1	chr9:74398191-74398535 (+127785), chr9:74397387-74397841 (+128534)	2
FAM155A	chr13:108396422-108396837 (+122830), chr13:108364124-108364924 (+154936)	2
FARP1	chr13:98824944-98824991 (+29534), chr13:98825304-98826257 (+30347)	2
FAM21C	chr10:46193087-46193976 (-29116), chr10:46323059-46323857 (+100810)	2
FAM180A	chr7:135459008-135459498 (-25659), chr7:135458180-135458684 (-24838)	2
ENPP1	chr6:132144448-132144876 (+15506), chr6:132165322-132165814 (+36412)	2
EPHA4	chr2:222210712-222211483 (+225912), chr2:221547195-221547763 (+889531)	2
EPM2A	chr6:145510927-145511386 (+545834), chr6:145432308-145433077 (+624298)	2
EPS15	chr1:52037920-52038500 (-53215), chr1:52033028-52033869 (-48454)	2
ENTPD6	chr20:25158496-25159113 (-17534), chr20:25159324-25159534 (-16910)	2
ENAH	chr1:225953949-225954479 (-113369), chr1:225641741-225642286 (+198831)	2
ERC1	chr12:1159338-1159778 (+59154), chr12:1163469-1164183 (+63422)	2
ERN1	chr17:62293757-62294406 (-86580), chr17:62151452-62152356 (+55598)	2
ERP27	chr12:15057794-15058194 (+33469), chr12:15057207-15057528 (+34095)	2
ETV3	chr1:157330729-157331269 (-222616), chr1:157101867-157102921 (+5989)	2
EGR3	chr8:22596255-22597176 (-45901), chr8:22592223-22592936 (-41765)	2
TMEM229B	chr14:67959057-67959650 (+22667), chr14:67909091-67909689 (+72631)	2
EIF1B	chr3:39983341-39983822 (-367591), chr3:40024460-40025317 (-326284)	2
EIF4B	chr12:53363413-53364676 (-36017), chr12:53365027-53366192 (-34452)	2
ELF5	chr11:34592014-34592794 (-57057), chr11:34581966-34582578 (-46925)	2
ELTD1	chr1:79983052-79983620 (-510841), chr1:79756588-79757537 (-284568)	2
EML4	chr2:42476582-42476909 (+80256), chr2:42510705-42511149 (+114437)	2
PTH2R	chr2:210233141-210233525 (+961777), chr2:210233568-210234003 (+962230)	2
PUM2	chr2:20581054-20581670 (-54223), chr2:20551205-20551761 (-24344)	2
PXDNL	chr8:52763508-52764308 (-41903), chr8:52716696-52716895 (+5209)	2
PXN	chr12:120672140-120672982 (+31013), chr12:120669022-120670000 (+34063)	2
PYGB	chr20:25262254-25262678 (+33760), chr20:25334554-25335226 (+106184)	2
FEZ2	chr2:36598703-36599571 (+226195), chr2:36588071-36588483 (+237055)	2
FGD3	chr9:95750400-95751267 (+14116), chr9:95751625-95751714 (+14952)	2
FBXO38	chr5:147774101-147774412 (+10711), chr5:147777815-147778558 (+14641)	2
FBXL14	chr12:1163469-1164183 (+539505), chr12:1159338-1159778 (+543773)	2
FBXW2	chr9:123582102-123582806 (-26714), chr9:123576970-123577623 (-21557)	2
PTCHD2	chr1:11434163-11435123 (-104652), chr1:11629662-11629994 (+90533)	2
PTGER3	chr1:71340355-71340598 (+173014), chr1:71339634-71340332 (+173508)	2
FITM2	chr20:42930692-42931676 (+8705), chr20:42915766-42916601 (+23705)	2
PSMD5	chr9:123582102-123582806 (+22752), chr9:123576970-123577623 (+27909)	2
FKBP4	chr12:2884319-2885546 (-19175), chr12:2904864-2905608 (+1128)	2
RASL10B	chr17:34043932-34044688 (-14369), chr17:34046877-34047557 (-11462)	2
RBM15	chr1:110778262-110779173 (-103227), chr1:110867263-110867653 (-14487)	2
RBM5	chr3:50164269-50165336 (+38462), chr3:50183885-50184412 (+57808)	2
RARRES3	chr11:63298885-63299666 (-4997), chr11:63325909-63326600 (+21982)	2
RELT	chr11:73180369-73180976 (+93268), chr11:73205089-73205768 (+118024)	2
RCL1	chr9:4864213-4864707 (+71626), chr9:4866083-4866885 (+73650)	2
RCN1	chr11:32442312-32443118 (+330238), chr11:32443178-32443627 (+330926)	2
RCOR1	chr14:103158037-103158605 (+99325), chr14:103163289-103163984 (+104641)	2
RAPGEF2	chr4:159726733-159727116 (-462073), chr4:160150273-160150846 (-38438)	2
RAPGEF5	chr7:22482545-22483007 (-86243), chr7:22429064-22429966 (-32982)	2
RAPGEF6	chr5:131007868-131008485 (-37248), chr5:130832282-130832735 (+138420)	2
RAP2A	chr13:97909935-97910725 (-176145), chr13:97931998-97932661 (-154145)	2
RAD18	chr3:9236001-9236821 (-231252), chr3:9217076-9217560 (-212159)	2
RAI1	chr17:17600449-17600999 (+15937), chr17:17689404-17689926 (+104878)	2
RIOK1	chr6:7418357-7418957 (+28595), chr6:7464006-7464294 (+74088)	2
RNF144A	chr2:7171884-7172451 (+114645), chr2:7932308-7932888 (+875075)	2
RND3	chr2:151443405-151443794 (-99391), chr2:151022734-151023116 (+321284)	2
ROBO2	chr3:77611953-77612692 (+523029), chr3:78071307-78071784 (+982252)	2
RNF19A	chr8:101483930-101485152 (-169054), chr8:101429391-101429893 (-114155)	2
RGPD6	chr2:110448265-110448813 (-101796), chr2:110549148-110549883 (-819)	2
RFX3	chr9:3677520-3678297 (-151926), chr9:3676269-3677423 (-150863)	2
RGPD3	chr2:107177199-107177673 (-92635), chr2:107176116-107176676 (-91595)	2
RHAG	chr6:49644279-49644977 (-40041), chr6:49635544-49636448 (-31409)	2
RHO	chr3:129228501-129229115 (-18674), chr3:129231422-129231981 (-15780)	2
RIMS1	chr6:72074686-72075268 (-521673), chr6:72075476-72075539 (-521142)	2
ZSWIM6	chr5:60470893-60471057 (-157125), chr5:60576518-60577276 (-51203)	2
REPS2	chrX:16900040-16900588 (-64500)	1
RP2	chrX:46671942-46672309 (-24221)	1
RNF128	chrX:105362918-105363212 (-606829)	1
PTCHD1	chrX:23454540-23454958 (+101764)	1
ESX1	chrX:103603811-103604339 (-104476)	1
FAM9B	chrX:9389410-9389819 (-388499)	1
KLHL13	chrX:117207928-117208655 (-88916)	1
LAMP2	chrX:119619636-119620295 (-16762)	1
TBL1X	chrX:9389410-9389819 (-43586)	1
THOC2	chrX:122854330-122854694 (+12392)	1
TMEM164	chrX:109416315-109416867 (+170249)	1
TMEM185A	chrX:148769250-148769570 (-55923)	1
P2RY10	chrX:78094118-78095774 (-105883)	1
NYX	chrX:41304973-41305408 (-1522)	1
OPN1LW	chrX:153386686-153387006 (-22879)	1
TXLNG	chrX:16879824-16880171 (+75443)	1
TRMT2B	chrX:100235896-100236311 (+71001)	1
TSC22D3	chrX:106969003-106969347 (+49842)	1
USP9X	chrX:41104717-41105433 (+160187)	1
UBQLN2	chrX:56765045-56765598 (+175296)	1
KDM5C	chrX:53292214-53292509 (-37758)	1
CTPS2	chrX:16680142-16681601 (+50187)	1
CTAG1A	chrX:153877780-153878764 (-30750)	1
CTAG2	chrX:153877780-153878764 (+3581)	1
CHIC1	chrX:73401658-73401896 (+618793)	1
CITED1	chrX:71601277-71602454 (-76102)	1
PGRMC1	chrX:118227985-118228758 (-141839)	1
IQSEC2	chrX:53292214-53292509 (+58160)	1
HPRT1	chrX:133704504-133704848 (+110501)	1
NDP	chrX:43897610-43898117 (-64943)	1
NHS	chrX:17725194-17725626 (+331867)	1
HDAC8	chrX:71601277-71602454 (+191087)	1
AMMECR1	chrX:109416315-109416867 (+144789)	1
MTMR1	chrX:149865001-149865258 (+3261)	1
MTCP1NB	chrX:154256165-154256283 (+43323)	1
SPIN3	chrX:56765045-56765598 (+256666)	1
WDR44	chrX:117207928-117208655 (-271744)	1
XPNPEP2	chrX:128907819-128908245 (+35086)	1
YIPF6	chrX:67682024-67682798 (-36213)	1
ZNF630	chrX:47943005-47943453 (-12721)	1
ZNF81	chrX:47814781-47816135 (+119157)	1
YY2	chrX:21932572-21933085 (+58724)	1
ZCCHC13	chrX:73401658-73401896 (-122248)	1
ZCCHC5	chrX:77588843-77589255 (+325776)	1
ZNF182	chrX:47814781-47816135 (+47919)	1
CD99L2	chrX:149865001-149865258 (+202159)	1
SLC9A7	chrX:46671942-46672309 (-53654)	1
SMARCA1	chrX:128461230-128461838 (+195926)	1
PRDX4	chrX:23454540-23454958 (-230896)	1
PRPS1	chrX:106969003-106969347 (+97521)	1
PLAC1	chrX:133704504-133704848 (+87837)	1
POU3F4	chrX:82068516-82069258 (-694382)	1
DGKK	chrX:50331442-50331824 (-117912)	1
DGAT2L6	chrX:69440263-69440573 (+43082)	1
DDX3X	chrX:41104717-41105433 (-87576)	1
CYSLTR1	chrX:77588843-77589255 (-5962)	1
DDX53	chrX:22692982-22693564 (-324805)	1
CUL4B	chrX:119619636-119620295 (+89718)	1
CXorf40A	chrX:148628058-148628573 (+5797)	1
MID1	chrX:10724339-10725049 (+127115)	1
MID1IP1	chrX:39478556-39479647 (+818417)	1
MECP2	chrX:153386686-153387006 (-23658)	1
DUSP21	chrX:44404456-44405469 (-298286)	1
LOC100509575	chrX:47943005-47943453 (-24138)	1
LPAR4	chrX:78094118-78095774 (+91740)	1
LONRF3	chrX:118227985-118228758 (+119659)	1
MAGEA11	chrX:148769250-148769570 (-24275)	1
MAGEA9B	chrX:148628058-148628573 (+40800)	1
SERPINA7	chrX:105362918-105363212 (-80347)	1
SHROOM4	chrX:50331442-50331824 (+225411)	1
TMSB4X	chrX:13046837-13048739 (+54562)	1
SASH3	chrX:128907819-128908245 (-5860)	1
SAT1	chrX:23821881-23822605 (+20968)	1
AWAT1	chrX:69440263-69440573 (-14087)	1
ARL13A	chrX:100235896-100236311 (+11407)	1
ARL15	chr5:53734747-53735325 (-128633)	1
ARL3	chr10:104418045-104418601 (+55867)	1
ARHGAP42	chr11:100503517-100504336 (-54480)	1
ARHGAP5	chr14:32780380-32781246 (+234318)	1
ARHGEF10	chr8:1911212-1911661 (+139288)	1
ARHGEF10L	chr1:17891161-17891608 (+25055)	1
ARL6IP4	chr12:123519201-123519828 (+54635)	1
ARL8A	chr1:202101008-202102190 (+12267)	1
ARL8B	chr3:5101655-5102180 (-62012)	1
ARMC3	chr10:23370044-23370784 (+153460)	1
ARL4C	chr2:235585546-235585712 (-179936)	1
GSC2	chr22:19160481-19161042 (-22966)	1
ARNT2	chr15:80455384-80456065 (-240967)	1
ARPC5	chr1:183574132-183575692 (+30073)	1
ARPM1	chr3:169472322-169472938 (+15053)	1
ARRDC3	chr5:91441972-91442098 (-762886)	1
ARRDC4	chr15:98998961-98999775 (+495435)	1
ARSJ	chr4:115021441-115022024 (-120855)	1
ART4	chr12:14994666-14995207 (+1476)	1
ASCL2	chr11:2214491-2214949 (+77462)	1
ASL	chr7:65478773-65479228 (-61775)	1
ASPM	chr1:197099763-197100609 (+15638)	1
ASAP3	chr1:23799884-23800329 (+10643)	1
ASB4	chr7:95179380-95179883 (+64419)	1
ASB7	chr15:101261908-101262712 (+119555)	1
ATP7B	chr13:52493662-52494033 (+91782)	1
ATP6V0D1	chr16:67495592-67496080 (+19253)	1
ATP9B	chr18:76805830-76806084 (-23440)	1
ATP10D	chr4:47693743-47694385 (+206654)	1
ATP6V1D	chr14:67778125-67779131 (+48092)	1
ATP6V1G1	chr9:117307342-117307895 (-42375)	1
ATP6V1G3	chr1:198197892-198198480 (+311889)	1
ATL1	chr14:50999795-51000289 (+242)	1
ATL2	chr2:38323225-38323768 (+280935)	1
ATP1B1	chr1:168908798-168909173 (-166961)	1
ATP2A2	chr12:110782899-110783564 (+64200)	1
ARPP21	chr3:35549808-35550311 (-133789)	1
ASXL3	chr18:31382958-31383346 (+224611)	1
ATAD2	chr8:124417681-124418064 (-9168)	1
ATG5	chr6:106567314-106567994 (+206041)	1
AX746903	chr4:120501558-120501905 (-47213)	1
AZGP1	chr7:99568714-99569185 (+4785)	1
AZGP1P1	chr7:99581200-99581754 (+3092)	1
B3GALNT1	chr3:160514228-160514988 (+308075)	1
B3GALT1	chr2:168994282-168994484 (+319201)	1
B3GAT1	chr11:134397198-134397762 (-115668)	1
B3GNT2	chr2:62642214-62642916 (+219303)	1
BACH2	chr6:90924597-90925065 (+81796)	1
B4GALT5	chr20:48220848-48221471 (+109261)	1
BAHD1	chr15:40712727-40713423 (-20336)	1
BAI3	chr6:68389267-68390011 (-955993)	1
BAIAP2	chr17:79018475-79019161 (+9871)	1
BAIAP2L1	chr7:97944811-97945475 (+85284)	1
BASP1	chr5:17213051-17213577 (-4436)	1
BBIP1	chr10:112645689-112646248 (+33155)	1
BBS10	chr12:76660442-76660908 (+81547)	1
BBS9	chr7:33542967-33543493 (+374078)	1
BC049386	chr21:35799674-35800226 (-3686)	1
BC068290	chr16:34758301-34758820 (+974050)	1
BCAR1	chr16:75339137-75340233 (-39780)	1
BCL2L11	chr2:112049909-112050461 (+171694)	1
BCL2L13	chr22:18229120-18229536 (+107843)	1
BCL11B	chr14:99470412-99470977 (+267127)	1
BCCIP	chr10:127525251-127525797 (+13420)	1
BCL9	chr1:147022845-147023199 (+9840)	1
BDKRB2	chr14:96531840-96532224 (-139103)	1
BFAR	chr16:14750317-14750715 (+23848)	1
BFSP1	chr20:17543164-17543994 (-31566)	1
BLVRB	chr19:40971819-40972376 (-373)	1
BMF	chr15:40347050-40347897 (+53601)	1
BMP2K	chr4:79490295-79490473 (-207148)	1
BMP5	chr6:55623235-55623802 (+116856)	1
BID	chr22:18229120-18229536 (+28103)	1
BIK	chr22:43510943-43511366 (+4401)	1
BIRC3	chr11:101991169-101991594 (-196799)	1
BLMH	chr17:28570176-28570654 (+48769)	1
BLNK	chr10:98031155-98031801 (-145)	1
GPR142	chr17:72391001-72392047 (+27879)	1
GPR116	chr6:46983761-46984986 (-94660)	1
GPR123	chr10:134813349-134813957 (-70780)	1
GPD1L	chr3:32151611-32152313 (+3959)	1
GPER	chr7:1135953-1136506 (+8507)	1
GPHB5	chr14:63971228-63972221 (-186132)	1
GPR31	chr6:167533692-167534386 (+37280)	1
GPR37L1	chr1:202101008-202102190 (+9570)	1
GPR45	chr2:105912378-105913044 (+54511)	1
GPR52	chr1:174934953-174935594 (+518062)	1
GPR65	chr14:88476641-88477850 (+5778)	1
GPR183	chr13:100006761-100007230 (-47247)	1
GPR20	chr8:142273878-142275044 (+102904)	1
GOLT1A	chr1:204349378-204350335 (-166637)	1
GPBP1	chr5:56731366-56732007 (+221786)	1
GPC5	chr13:91855722-91856028 (-195060)	1
GOLM1	chr9:88708573-88709586 (+5430)	1
GNB1	chr1:1790572-1791172 (+31654)	1
GNB1L	chr22:19836326-19836748 (+5925)	1
GNMT	chr6:42922027-42922513 (-6230)	1
GNPDA1	chr5:141349815-141350331 (+42547)	1
GNRH1	chr8:25265766-25266038 (+16654)	1
GNRHR	chr4:68577700-68578045 (+43931)	1
GRIK3	chr1:37503831-37504921 (-4532)	1
GRID2	chr4:92392418-92392760 (-832961)	1
GRPEL1	chr4:7047319-7048050 (+22115)	1
ARID3B	chr15:74823548-74823976 (-9786)	1
GRB14	chr2:165379002-165379589 (+99064)	1
GRB7	chr17:37968611-37969172 (+74730)	1
GPSM2	chr1:109431815-109432195 (+12402)	1
GPX8	chr5:54483965-54485519 (+28758)	1
GRAMD4	chr22:46970851-46971336 (-51554)	1
GPR75	chr2:54188729-54189469 (-101929)	1
GPR87	chr3:151022633-151023569 (+11535)	1
GPR88	chr1:100951390-100951957 (-52054)	1
GPRC5A	chr12:13036123-13036751 (-7519)	1
GIGYF2	chr2:233516357-233516825 (-45424)	1
GINS2	chr16:85714839-85715258 (+7539)	1
GINS3	chr16:58417709-58418794 (-8046)	1
GIT2	chr12:110476551-110477704 (-42934)	1
GET4	chr7:906470-907780 (-9066)	1
GFOD2	chr16:67710313-67710877 (+42678)	1
GJA10	chr6:90924597-90925065 (+320643)	1
GJA4	chr1:35253189-35253568 (-5220)	1
GJB3	chr1:35253189-35253568 (+5468)	1
GJC3	chr7:99568714-99569185 (-41707)	1
GJD3	chr17:38478064-38479176 (+42325)	1
GGT5	chr22:24603544-24603604 (+37536)	1
GGTLC1	chr20:24078059-24078131 (-108679)	1
GLRA1	chr5:151159285-151159774 (+144867)	1
GLTSCR1	chr19:48151427-48152014 (+40268)	1
GLUL	chr1:182187075-182187536 (+173233)	1
GMNC	chr3:190525320-190526095 (+54757)	1
GMPPA	chr2:220343150-220343641 (-20191)	1
GMPR	chr6:16406738-16407419 (+168268)	1
GNA13	chr17:62990349-62990747 (+62372)	1
GLCCI1	chr7:7830560-7832153 (-177066)	1
GLCE	chr15:69327159-69327308 (-125739)	1
GLDC	chr9:6628705-6629202 (+16738)	1
GLOD4	chr17:828009-828759 (-142813)	1
GCC2	chr2:109249226-109249471 (+183772)	1
GCFC2	chr2:76483700-76484445 (-545962)	1
GALNT9	chr12:133042883-133043791 (-137432)	1
GALNTL2	chr3:15946413-15946829 (-269563)	1
GALNTL6	chr4:173730438-173730873 (+996081)	1
GAMT	chr19:1402647-1403194 (-1369)	1
GANC	chr15:42562797-42564017 (-2959)	1
GAPVD1	chr9:128323983-128324562 (+300162)	1
GDF9	chr5:132173471-132173984 (+26749)	1
GAS8	chr16:90087200-90087763 (-1526)	1
GCLM	chr1:94583304-94584088 (-208684)	1
GCM1	chr6:53039644-53040152 (-26274)	1
GCNT4	chr5:74342183-74342775 (-15755)	1
GCOM1	chr15:57889689-57890138 (+5812)	1
GDAP1	chr8:75488328-75489118 (+226105)	1
GDAP2	chr1:118105279-118105617 (+366854)	1
GABRD	chr1:1933190-1933681 (-17332)	1
GABRG3	chr15:27655784-27656694 (+439810)	1
GALNT2	chr1:230344145-230344729 (+141481)	1
GALNT3	chr2:166668549-166669225 (-18084)	1
FZD1	chr7:90693412-90693782 (-200186)	1
FZD5	chr2:208712475-208712936 (-78563)	1
G3BP1	chr5:151159285-151159774 (+8054)	1
FUT10	chr8:33102306-33103355 (+227833)	1
FUT5	chr19:5870201-5870600 (+233)	1
FUT8	chr14:65584643-65585592 (-292192)	1
FUT9	chr6:96897878-96898899 (+434544)	1
FYB	chr5:39100962-39101456 (+169550)	1
SARDH	chr9:136728357-136728801 (-125100)	1
SAMHD1	chr20:35475354-35475924 (+104607)	1
SALL3	chr18:76805830-76806084 (+65682)	1
S100A16	chr1:153580268-153581042 (+4859)	1
S100A2	chr1:153580268-153581042 (-42349)	1
S1PR3	chr9:91616011-91616682 (+9985)	1
RYK	chr3:134032671-134033184 (-63342)	1
RYR3	chr15:34233907-34234253 (+630903)	1
S100A11	chr1:152020058-152021264 (-11150)	1
SCCPDH	chr1:246771930-246772647 (-115089)	1
SCD	chr10:102132887-102133828 (+26586)	1
SCEL	chr13:77992037-77992389 (-117596)	1
SCGN	chr6:25284259-25284680 (-367959)	1
SCN8A	chr12:51922529-51923018 (-62246)	1
SCNN1B	chr16:23335864-23336646 (+22664)	1
SCOC	chr4:141226137-141226749 (-38154)	1
SCP2	chr1:53415192-53415554 (+22472)	1
SCTR	chr2:120275963-120276396 (+5848)	1
SCUBE1	chr22:43594568-43595157 (+144531)	1
SDK1	chr7:3140158-3140806 (-200598)	1
SDK2	chr17:71555106-71555725 (+84811)	1
SDC1	chr2:20271228-20272173 (+153226)	1
SDC4	chr20:43971574-43971768 (+5393)	1
SEC14L3	chr22:30804726-30805170 (+63086)	1
SEC22C	chr3:42585915-42586969 (+37078)	1
SEC24D	chr4:119678996-119679367 (+78144)	1
SEC61A2	chr10:12192025-12192756 (+20751)	1
SEC61G	chr7:55034772-55035595 (-208245)	1
SEMA3A	chr7:84165367-84166036 (-341485)	1
SEC14L1	chr17:75251354-75251909 (+114627)	1
2015-09-01	chr1:87258740-87259273 (+121100)	1
SEPN1	chr1:26083585-26084466 (-42641)	1
SEMA3G	chr3:52472395-52472760 (+6465)	1
SEMA4C	chr2:97554179-97554579 (-18644)	1
SEMA3D	chr7:84165367-84166036 (+585545)	1
2008-09-01	chr5:132143860-132144907 (-31317)	1
RRM2	chr2:10405834-10406215 (+143330)	1
RRP15	chr1:217978916-217979944 (-479199)	1
RUNX2	chr6:44628983-44629732 (-666696)	1
RUNX3	chr1:25468635-25468985 (-212040)	1
RUSC2	chr9:35517439-35519530 (+28478)	1
RXRA	chr9:137109443-137110050 (-108569)	1
RPS6KL1	chr14:75412250-75412847 (-23361)	1
RPTOR	chr17:78734313-78734853 (+215958)	1
RPUSD2	chr15:40803734-40804367 (-57486)	1
RRAGC	chr1:39194683-39195060 (+130468)	1
RRAS2	chr11:14276057-14276953 (+104225)	1
RTL1	chr14:101874547-101875653 (-523916)	1
RTN4RL1	chr17:1848839-1849764 (+78876)	1
RUFY4	chr2:218816187-218816430 (-117429)	1
C14orf169	chr14:74009683-74010400 (+52398)	1
C14orf49	chr14:95805513-95807365 (+135734)	1
RPL14	chr3:40509374-40510130 (+10951)	1
RPL22L1	chr3:170524012-170525069 (+63504)	1
RPL30	chr8:99080581-99081533 (-23239)	1
RPL31	chr2:101736866-101737519 (+118502)	1
RPL34	chr4:109185885-109186336 (-355611)	1
BNIP3	chr10:133829573-133830040 (-34372)	1
BOC	chr3:112958392-112958987 (+27315)	1
BPGM	chr7:134373669-134374104 (+42356)	1
BRD1	chr22:49881546-49881985 (+336686)	1
BRE	chr2:28600028-28600404 (+486734)	1
BRF2	chr8:37710491-37711067 (-3348)	1
BRI3	chr7:97944811-97945475 (+34164)	1
BRWD1	chr21:40693321-40694321 (-8109)	1
BZW2	chr7:16718448-16719007 (+32969)	1
C10orf112	chr10:19789663-19790538 (+12078)	1
C10orf12	chr10:98623382-98624437 (-117131)	1
BTG3	chr21:18895273-18895786 (+89738)	1
BTN3A2	chr6:26296155-26296550 (-72053)	1
C11orf34	chr11:112141711-112142022 (-10284)	1
C10orf26	chr10:104528941-104530132 (+25810)	1
C10orf58	chr10:82201599-82201939 (+28194)	1
C11orf82	chr11:82714965-82715912 (+102702)	1
C11orf87	chr11:108537676-108538467 (-754774)	1
C12orf28	chr12:70144827-70145215 (-175416)	1
C12orf69	chr12:14994666-14995207 (-27821)	1
C12orf76	chr12:110476551-110477704 (+34311)	1
TMEM93	chr17:3571690-3571985 (-252)	1
TMEM67	chr8:94842027-94842693 (+75288)	1
TMEM87A	chr15:42562797-42564017 (+2348)	1
TMEM38B	chr9:108672264-108672766 (+215690)	1
TMEM41A	chr3:185267497-185268104 (-50956)	1
TMEM5	chr12:64199426-64200325 (+26239)	1
TMEM52	chr1:1933190-1933681 (-82696)	1
TNFSF18	chr1:172715444-172716019 (+304371)	1
TNFSF8	chr9:117670120-117671049 (+22290)	1
TNIK	chr3:171302822-171303749 (-125089)	1
TNFRSF21	chr6:47015096-47015657 (+262303)	1
TNFRSF25	chr1:6543108-6543673 (-17136)	1
TNKS2	chr10:93449754-93450658 (-107945)	1
TNN	chr1:175147158-175148139 (+110655)	1
TNR	chr1:175147158-175148139 (+565103)	1
TNRC18	chr7:5456758-5458605 (+5495)	1
TNRC6C	chr17:75324916-75325387 (-675166)	1
TRAM2	chr6:52416357-52417322 (+25022)	1
TRAF4	chr17:27072954-27074643 (+2776)	1
TRAK1	chr3:42122077-42122521 (-10447)	1
TPSG1	chr16:1275663-1276015 (-585)	1
TPST2	chr22:26964083-26964606 (+21744)	1
TPTE2	chr13:20131437-20131877 (-20754)	1
TRAF1	chr9:123747894-123748495 (-56744)	1
TPO	chr2:1635636-1636031 (+218601)	1
TPRA1	chr3:126831736-126832356 (+477522)	1
TPGS2	chr18:34599216-34599616 (-190258)	1
TPSAB1	chr16:1299577-1299653 (+8937)	1
TOM1L2	chr17:17790272-17790678 (+85309)	1
TOMM40	chr19:45381663-45382144 (-12573)	1
TOMM6	chr6:41752191-41752829 (-1990)	1
TOP1	chr20:39531941-39532501 (-125241)	1
TOP2B	chr3:25766278-25766819 (-60718)	1
TOR2A	chr9:130521036-130521477 (-23629)	1
TP53I11	chr11:45007308-45008005 (-35049)	1
TP53I3	chr2:24307062-24307418 (+845)	1
TNFAIP8	chr5:117691443-117691869 (-999940)	1
SI	chr3:164019700-164020365 (+776250)	1
SIAH1	chr16:48281198-48281813 (+137723)	1
SHC3	chr9:91616011-91616682 (+177335)	1
SHFM1	chr7:96500182-96500954 (-161365)	1
SH3GLB1	chr1:87258740-87259273 (+88754)	1
SH3PXD2B	chr5:171810203-171810662 (+71094)	1
[truncated: 1,732 more rows]

## Sheet: Region2Genes
# GREAT version 2.0.2	Species assembly: hg19	Association rule: Basal+extension: 5000 bp upstream, 1000 bp downstream, 1000000 bp max extension, curated regulatory domains included
Region	Genes
chr2:238417740-238418175	PRLH (-57259), MLPH (+22080)
chr2:238418357-238418744	PRLH (-56666), MLPH (+22673)
chr2:238467379-238468312	PRLH (-7371), MLPH (+71968)
chr2:239194151-239194861	HES6 (-45825), PER2 (+2701)
chr2:240189785-240190557	HDAC4 (+132472), TWIST2 (+433498)
chr2:241837693-241838195	SNED1 (-100311), AGXT (+29782)
chr20:425711-426035	TBC1D20 (+17314), RBCK1 (+37164)
chr20:2225040-2225821	TGM3 (-51182), STK35 (+142903)
chr20:2457947-2458428	SNRPB (-6689), ZNF343 (+31590)
chr20:2679729-2680085	EBF4 (+6383), CPXM1 (+101385)
chr20:3750329-3750816	SPEF1 (+11529), HSPA12B (+37256)
chr20:10642901-10643493	JAG1 (+11497), C20orf94 (+227246)
chr20:13267175-13267725	ISM1 (+65032), TASP1 (+352133)
chr20:14745511-14745910	FLRT3 (-427398)
chr20:14826177-14826550	FLRT3 (-508051)
chr20:15042486-15043045	FLRT3 (-724453)
chr20:15277059-15277558	FLRT3 (-958996)
chr20:17543164-17543994	BFSP1 (-31566), DSTN (-7020)
chr20:17875695-17876201	SNX5 (+73206), BANF2 (+201628)
chr20:17876775-17877380	SNX5 (+72076), BANF2 (+202758)
chr20:19110748-19111172	SLC24A3 (-82330), C20orf79 (+316590)
chr20:19263909-19264817	RIN2 (-602802), SLC24A3 (+71073)
chr20:19377111-19378212	RIN2 (-489503), SLC24A3 (+184372)
chr20:19386584-19387535	RIN2 (-480105), SLC24A3 (+193770)
chr20:19690519-19691361	RIN2 (-176225), SLC24A3 (+497650)
chr20:19693253-19693906	RIN2 (-173585), SLC24A3 (+500290)
chr20:19739326-19739483	RIN2 (-127760), SLC24A3 (+546115)
chr20:19747614-19748343	RIN2 (-119186), SLC24A3 (+554689)
chr20:19756101-19756955	RIN2 (-110637), SLC24A3 (+563238)
chr20:19764466-19765656	RIN2 (-102104), SLC24A3 (+571771)
chr20:20177318-20177664	INSM1 (-171274), CRNKL1 (-140801)
chr20:20185726-20186456	INSM1 (-162674), CRNKL1 (-149401)
chr20:20434939-20435451	INSM1 (+86430), RALGAPA2 (+258071)
chr20:20529241-20529898	RALGAPA2 (+163696), INSM1 (+180805)
chr20:20551904-20552552	RALGAPA2 (+141038), INSM1 (+203463)
chr20:20554389-20554856	RALGAPA2 (+138643), INSM1 (+205858)
chr20:20739707-20740797	PLK1S1 (-366372), RALGAPA2 (-46986)
chr20:21642011-21642981	NKX2-2 (-147832), PAX1 (-43801)
chr20:21923348-21923750	PAX1 (+237252), FOXA2 (+641552)
chr20:23338313-23338869	GZF1 (-6409), NXT1 (+7218)
chr20:24078059-24078131	SYNDIG1 (-371740), GGTLC1 (-108679)
chr20:24630420-24631188	CST7 (-299062), SYNDIG1 (+180969)
chr20:24997869-24998352	C20orf3 (-24686), ACSS1 (+40707)
chr20:24999069-24999495	C20orf3 (-25857), ACSS1 (+39536)
chr20:25158496-25159113	VSX1 (-96038), ENTPD6 (-17534)
chr20:25159324-25159534	VSX1 (-96662), ENTPD6 (-16910)
chr20:25262254-25262678	PYGB (+33760), ABHD12 (+109152)
chr20:25334554-25335226	ABHD12 (+36728), PYGB (+106184)
chr20:30267556-30268594	COX4I2 (+42384), BCL2L1 (+42581)
chr20:30307167-30308255	BCL2L1 (+2945), COX4I2 (+82020)
chr20:30628436-30629057	HCK (-11244), XKR7 (+72942)
chr20:30629506-30630264	HCK (-10106), XKR7 (+74080)
chr20:31329726-31330174	C20orf203 (-90167), COMMD7 (+1864)
chr20:32238610-32239599	NECAB3 (+23159), CBFA2T2 (+161177)
chr20:32258601-32259128	NECAB3 (+3399), CBFA2T2 (+180937)
chr20:32321456-32322353	CHMP4B (-77205), ZNF341 (+2097)
chr20:32403409-32403911	RALY (-177798), CHMP4B (+4550)
chr20:32923443-32923950	AHCY (-32482), ITCH (-27365)
chr20:35402762-35403148	DSN1 (-801)
chr20:35475354-35475924	DSN1 (-73485), SAMHD1 (+104607)
chr20:36688162-36688665	TTI1 (-26581), TGM2 (+105286)
chr20:36736749-36737917	TTI1 (-75500), TGM2 (+56367)
chr20:36737986-36738532	TTI1 (-76426), TGM2 (+55441)
chr20:37177307-37177878	ADIG (-32245), RALGAPB (+76107)
chr20:37588755-37589469	DHX35 (-1869)
chr20:38945937-38946777	MAFB (+371519)
chr20:39277583-39278075	MAFB (+40047)
chr20:39531941-39532501	MAFB (-214345), TOP1 (-125241)
chr20:39920708-39921292	ZHX3 (+7739), PLCG1 (+154839)
chr20:40278889-40279542	CHD6 (-32083)
chr20:42770759-42770986	JPH2 (+45345), TOX2 (+227381)
chr20:42771130-42771799	JPH2 (+44753), TOX2 (+227973)
chr20:42794310-42795415	JPH2 (+21355), TOX2 (+251371)
chr20:42915766-42916601	JPH2 (-99966), FITM2 (+23705)
chr20:42930692-42931676	JPH2 (-114966), FITM2 (+8705)
chr20:43343087-43343743	WISP2 (-470)
chr20:43393706-43394769	KCNK15 (+19750), RIMS4 (+44741)
chr20:43971574-43971768	MATN4 (-34704), SDC4 (+5393)
chr20:44501960-44502224	ZSWIM1 (-7756), ZSWIM3 (+15872)
chr20:45768359-45768959	ZMYND8 (+216815), EYA2 (+245396)
chr20:45947102-45948144	ZMYND8 (+37851), EYA2 (+424360)
chr20:45948455-45948991	ZMYND8 (+36751), EYA2 (+425460)
chr20:45973921-45974445	ZMYND8 (+11291), EYA2 (+450920)
chr20:46135123-46135604	NCOA3 (+4763), SULF2 (+279444)
chr20:46540844-46541267	SULF2 (-126248), PREX1 (+903364)
chr20:47314208-47315108	SULF2 (-899850), PREX1 (+129762)
chr20:47428484-47430010	PREX1 (+15173)
chr20:47480617-47481986	ARFGEF2 (-56973), PREX1 (-36882)
chr20:48220848-48221471	PTGIS (-36453), B4GALT5 (+109261)
chr20:48598463-48598944	SNAI1 (-809)
chr20:49011755-49012335	PTPN1 (-114846), CEBPB (+204925)
chr20:49029608-49029982	PTPN1 (-97096), CEBPB (+222675)
chr20:49031248-49032105	PTPN1 (-95214), CEBPB (+224557)
chr20:49067530-49068431	PTPN1 (-58910), CEBPB (+260861)
chr20:49286565-49287612	PARD6B (-60992), PTPN1 (+160198)
chr20:49341061-49341919	PARD6B (-6591), PTPN1 (+214599)
chr20:49342194-49342740	PARD6B (-5614), PTPN1 (+215576)
chr20:49343436-49344801	PARD6B (-3962)
chr20:49377789-49378793	BCAS4 (-33176), PARD6B (+30210)
chr20:49379246-49379887	BCAS4 (-31900), PARD6B (+31486)
chr20:49380195-49381222	BCAS4 (-30758), PARD6B (+32628)
chr20:49415069-49415649	BCAS4 (+3892), ADNP (+132168)
chr20:49431371-49431843	BCAS4 (+20140), ADNP (+115920)
chr20:49434147-49434807	BCAS4 (+23010), ADNP (+113050)
chr20:49440579-49441279	BCAS4 (+29462), ADNP (+106598)
chr20:50003918-50004569	KCNG1 (-364569), NFATC2 (+155014)
chr20:51962623-51963298	ZNF217 (+236746), TSHZ2 (+374015)
chr20:52402557-52403229	ZNF217 (-203186), BCAS1 (+284411)
chr20:52468600-52469064	ZNF217 (-269125), BCAS1 (+218472)
chr20:52811359-52812327	CYP24A1 (-21327), PFDN4 (-12659)
chr20:55244002-55244486	TFAP2C (+39886), BMP7 (+597463)
chr20:55309783-55310934	TFAP2C (+106001), BMP7 (+531348)
chr20:55333217-55334458	TFAP2C (+129480), BMP7 (+507869)
chr20:55362516-55363120	TFAP2C (+158460), BMP7 (+478889)
chr20:55363209-55363956	TFAP2C (+159225), BMP7 (+478124)
chr20:61554047-61554474	TCFL5 (-61146), DIDO1 (+3642)
chr20:61701070-61701480	BIRC7 (-166001), BHLHE23 (-62888)
chr20:61829905-61830256	BHLHE23 (-191694), BIRC7 (-37195)
chr20:61838251-61838677	BHLHE23 (-200077), BIRC7 (-28812)
chr20:62711786-62712238	OPRL1 (-4357), RGS19 (-688)
chr21:15646005-15646476	ABCC13 (+121)
chr21:16084265-16085007	SAMSN1 (-165972), NRIP1 (+352490)
chr21:16235562-16236196	SAMSN1 (-317215), NRIP1 (+201247)
chr21:16580170-16580739	USP25 (-522041), NRIP1 (-143329)
chr21:16582269-16583199	USP25 (-519762), NRIP1 (-145608)
chr21:16583753-16584375	USP25 (-518432), NRIP1 (-146938)
chr21:16714855-16715831	USP25 (-387153), NRIP1 (-278217)
chr21:17161172-17161890	USP25 (+59035)
chr21:18490726-18491363	CXADR (-394179)
chr21:18895273-18895786	CXADR (+10306), BTG3 (+89738)
chr21:22401255-22402060	NCAM2 (+31025)
chr21:22402496-22403066	NCAM2 (+32148)
chr21:23269432-23270379	NCAM2 (+899273)
chr21:23294111-23294867	NCAM2 (+923856)
chr21:23340946-23341549	NCAM2 (+970615)
chr21:23771856-23772832	NONE
chr21:27395036-27395642	ATP5J (-287374), APP (+147799)
chr21:27539196-27539700	ATP5J (-431483), APP (+3690)
chr21:27760828-27763135	APP (-218844), CYYR1 (+183599)
chr21:27763157-27763446	APP (-220164), CYYR1 (+182279)
chr21:30204394-30204854	N6AMT1 (+53069)
chr21:30205469-30205920	N6AMT1 (+51998)
chr21:30229979-30230665	N6AMT1 (+27371)
chr21:30750723-30752251	BACH1 (+80267), GRIK1 (+560795)
chr21:30758897-30759637	BACH1 (+88047), GRIK1 (+553015)
chr21:32901528-32902236	KRTAP19-8 (-491087), TIAM1 (+29408)
chr21:33358936-33359489	HUNK (+113585), MIS18A (+292163)
chr21:33827873-33828401	C21orf63 (+43385), C21orf59 (+156781)
chr21:35799674-35800226	BC049386 (-3686)
chr21:35917526-35918025	KCNE1 (-89713), RCAN1 (+69606)
chr21:36100290-36101580	CLIC6 (+59247), RUNX1-IT1 (+310788)
chr21:36102379-36103873	CLIC6 (+61438), RUNX1-IT1 (+308597)
chr21:36106761-36107715	CLIC6 (+65550), RUNX1-IT1 (+304485)
chr21:36108646-36110056	CLIC6 (+67663), RUNX1-IT1 (+302372)
chr21:36110373-36110941	CLIC6 (+68969), RUNX1-IT1 (+301066)
chr21:36589681-36590420	CBR1 (-852234), RUNX1 (-168456)
chr21:37325848-37326421	RUNX1 (-904540), CBR1 (-116150)
chr21:37330684-37331208	RUNX1 (-909351), CBR1 (-111339)
chr21:37489530-37489979	CBR3 (-17508), CBR1 (+47470)
chr21:37536565-37537136	DOPEY2 (+12)
chr21:37560218-37561115	MORC3 (-131820), DOPEY2 (+23828)
chr21:37565424-37566106	MORC3 (-126722), DOPEY2 (+28926)
chr21:37566380-37566421	MORC3 (-126086), DOPEY2 (+29562)
chr21:37574411-37574929	MORC3 (-117817), DOPEY2 (+37831)
chr21:37575034-37575522	MORC3 (-117209), DOPEY2 (+38439)
chr21:37607422-37607854	MORC3 (-84849), DOPEY2 (+70799)
chr21:37674186-37674865	MORC3 (-17961), DOPEY2 (+137687)
chr21:37985196-37985876	CLDN14 (-146811), SIM2 (-86455)
chr21:38218944-38219756	HLCS (+133914), SIM2 (+147359)
chr21:38444065-38444811	TTC3 (-1133), PIGP (+665)
chr21:38830760-38831499	DYRK1A (+38529), KCNJ6 (+457566)
chr21:39018290-39019039	DYRK1A (+226064), KCNJ6 (+270031)
chr21:40693321-40694321	BRWD1 (-8109), HMGN1 (+27226)
chr21:41356631-41357649	PCP4 (+117793), DSCAM (+861899)
chr21:41681775-41682752	PCP4 (+442917), DSCAM (+536775)
chr21:41690226-41691056	PCP4 (+451294), DSCAM (+528398)
chr21:41694590-41695054	PCP4 (+455475), DSCAM (+524217)
chr21:41703019-41703539	PCP4 (+463932), DSCAM (+515760)
chr21:41703572-41704036	PCP4 (+464457), DSCAM (+515235)
chr21:41710972-41711517	PCP4 (+471898), DSCAM (+507794)
chr21:41722835-41723455	PCP4 (+483798), DSCAM (+495894)
chr21:41752645-41752787	DSCAM (+466323), PCP4 (+513369)
chr21:41753302-41753840	DSCAM (+465468), PCP4 (+514224)
chr21:41757759-41758752	DSCAM (+460783), PCP4 (+518909)
chr21:41758763-41759671	DSCAM (+459822), PCP4 (+519870)
chr21:41760022-41760154	DSCAM (+458951), PCP4 (+520741)
chr21:42014972-42015389	DSCAM (+203858), PCP4 (+775834)
chr21:42395782-42396627	DSCAM (-177166), BACE2 (-143523)
chr21:42512678-42513414	DSCAM (-294007), BACE2 (-26682)
chr21:42514854-42515049	DSCAM (-295913), BACE2 (-24776)
chr21:42955018-42955610	TMPRSS2 (-75322), RIPK4 (+231935)
chr21:43073901-43074635	TMPRSS2 (-194276), RIPK4 (+112981)
chr21:43076970-43077677	TMPRSS2 (-197332), RIPK4 (+109925)
chr21:43098467-43099076	TMPRSS2 (-218780), RIPK4 (+88477)
chr21:43101264-43101903	TMPRSS2 (-221592), RIPK4 (+85665)
chr21:43203546-43204039	RIPK4 (-16544), PRDM15 (+95798)
chr21:43353028-43353457	PRDM15 (-53652), C2CD2 (+20756)
chr21:43392979-43393247	C2CD2 (-19114), ZNF295 (+37383)
chr21:43682730-43683693	ABCG1 (+43945), TFF3 (+52494)
chr21:44232199-44232943	WDR4 (+67107), PDE9A (+158709)
chr21:44764145-44764678	SIK1 (+82590), CRYAA (+175271)
chr21:46347936-46348333	ITGB2 (-7170), C21orf67 (+11693)
chr21:46841325-46841936	POFUT2 (-133820), COL18A1 (-33793)
chr21:46933338-46933838	SLC19A1 (+28797), COL18A1 (+58164)
chr21:47504935-47505520	COL6A2 (-12805), COL6A1 (+103565)
chr22:18229120-18229536	BID (+28103), BCL2L13 (+107843)
chr22:19160481-19161042	GSC2 (-22966), SLC25A1 (+5539)
chr22:19542246-19542942	SEPT5 (-159393), CLDN5 (-29734)
chr22:19544028-19544507	SEPT5 (-157719), CLDN5 (-31408)
chr22:19836326-19836748	GNB1L (+5925), TBX1 (+92311)
chr22:21221502-21222125	CRKL (-49900), SNAP29 (+8522)
chr22:21241602-21242359	CRKL (-29733), SNAP29 (+28689)
chr22:21270962-21271564	CRKL (-451)
chr22:21392051-21392484	SLC7A4 (-5421), GGT2 (+171504)
chr22:21425307-21425364	SLC7A4 (-38489), GGT2 (+138436)
chr22:21499112-21499776	SLC7A4 (-112597), GGT2 (+64328)
chr22:21619463-21619888	HIC2 (-152017), GGT2 (-55904)
chr22:22055566-22056075	YPEL1 (+34250), PPIL2 (+35548)
chr22:23489687-23490195	BCR (-32611), RAB36 (+2428)
chr22:23534492-23534829	BCR (+12109), IGLL1 (+387834)
chr22:23800716-23801530	IGLL1 (+121372), BCR (+278571)
chr22:23878335-23878733	IGLL1 (+43961), BCR (+355982)
chr22:24280895-24281245	LOC284889 (-39953), GSTT2 (+22323)
chr22:24363635-24364169	GSTT1 (+20382), GSTT2 (+41588)
chr22:24603544-24603604	SUSD2 (+26130), GGT5 (+37536)
chr22:24698480-24698938	ADORA2A (-124821), SPECC1L (+31919)
chr22:24699077-24700093	ADORA2A (-123945), SPECC1L (+32795)
chr22:24716843-24717010	ADORA2A (-106603), SPECC1L (+50137)
chr22:24717056-24717365	ADORA2A (-106319), SPECC1L (+50421)
chr22:24938577-24939639	SNRPD3 (-12510), UPB1 (+49031)
chr22:26964083-26964606	TFIP11 (-55908), TPST2 (+21744)
chr22:27816606-27817008	MN1 (+380679), CRYBA4 (+798879)
chr22:29203325-29203570	ZNRF3 (-76307), XBP1 (-6888)
chr22:29209199-29210402	ZNRF3 (-69954), XBP1 (-13241)
chr22:29214016-29215184	ZNRF3 (-65155), XBP1 (-18040)
chr22:29215202-29216390	ZNRF3 (-63959), XBP1 (-19236)
chr22:29217493-29218424	ZNRF3 (-61796), XBP1 (-21399)
chr22:29218441-29219682	ZNRF3 (-60693), XBP1 (-22502)
chr22:29219696-29220229	ZNRF3 (-59792), XBP1 (-23403)
chr22:29730819-29731267	RASL10A (-19295), AP1B1 (+53529)
chr22:29781416-29782037	RASL10A (-69979), AP1B1 (+2845)
chr22:29782047-29782512	RASL10A (-70532), AP1B1 (+2292)
chr22:29912961-29914180	THOC5 (+36073), NEFH (+37390)
chr22:30190865-30191303	UQCR10 (+27726), ASCC2 (+43209)
chr22:30194515-30195710	UQCR10 (+31755), ASCC2 (+39180)
chr22:30210013-30210473	ASCC2 (+24050), UQCR10 (+46885)
chr22:30212699-30213098	ASCC2 (+21394), UQCR10 (+49541)
chr22:30440074-30440832	HORMAD2 (-36000), MTMR3 (+161295)
chr22:30608423-30609184	LIF (+33992), HORMAD2 (+132351)
chr22:30687015-30687442	OSM (-24400), TBC1D10A (+35726)
chr22:30788840-30789510	SEC14L2 (-3755)
chr22:30804726-30805170	SEC14L2 (+12018), SEC14L3 (+63086)
chr22:31527666-31528157	PLA2G3 (+8557), INPP5J (+9003)
chr22:31603154-31603633	LIMK2 (-4856)
chr22:31975758-31976408	PISD (+50727), SFI1 (+83822)
chr22:31981194-31982871	PISD (+44777), SFI1 (+89772)
chr22:32033856-32034458	PISD (-7347), PRR14L (+111963)
chr22:32331901-32332400	YWHAH (-8328), DEPDC5 (+182142)
chr22:34248022-34248485	SYN3 (-845445), LARGE (+68162)
chr22:35711873-35712173	HMOX1 (-65037), TOM1 (+16226)
chr22:35755660-35756108	HMOX1 (-21176), TOM1 (+60087)
chr22:36019184-36019729	APOL6 (-24967), MB (-6073)
chr22:37908040-37909016	MFNG (-26050), CARD10 (+6696)
chr22:37966014-37966671	LGALS2 (+9681), CDC42EP1 (+9872)
chr22:38145982-38146342	H1F0 (-54952), TRIOBP (+53167)
chr22:38283515-38284142	MICALL1 (-18326), EIF3L (+38450)
chr22:38329303-38329638	C22orf23 (+20183), MICALL1 (+27316)
chr22:38576743-38577283	PLA2G6 (+748)
chr22:38618707-38619696	MAFF (+9660), TMEM184B (+49468)
chr22:38624686-38625064	MAFF (+15333), TMEM184B (+43795)
chr22:39572067-39572645	CBX7 (-23818), PDGFB (+68601)
chr22:39572923-39572946	CBX7 (-24397), PDGFB (+68022)
chr22:39648024-39648419	PDGFB (-7265), RPL3 (+67448)
chr22:39679511-39680123	PDGFB (-38860), RPL3 (+35853)
chr22:39680219-39680595	PDGFB (-39450), RPL3 (+35263)
chr22:40895044-40895420	SGSM3 (+128637), MKL1 (+137458)
chr22:41128560-41129155	MCHR1 (+53676), SLC25A17 (+86534)
chr22:41813955-41814396	TOB2 (+28851), TEF (+36213)
chr22:41814805-41814870	TOB2 (+28189), TEF (+36875)
chr22:42933268-42933832	RRP7A (-17721), SERHL2 (-16375)
chr22:42935275-42935783	RRP7A (-19700), SERHL2 (-14396)
chr22:43196856-43197194	A4GALT (-80149), ARFGAP3 (+56383)
chr22:43391077-43391701	ARFGAP3 (-137981), PACSIN2 (+19795)
chr22:43510943-43511366	BIK (+4401), MCAT (+28248)
chr22:43594568-43595157	TTLL12 (-11726), SCUBE1 (+144531)
chr22:44314956-44315709	PNPLA3 (-4286)
chr22:44851140-44851640	PRR5-ARHGAP8 (-246982), KIAA1644 (-142659)
chr22:46138715-46139061	ATXN10 (+71210), WNT7B (+234120)
chr22:46213971-46214343	ATXN10 (+146479), WNT7B (+158851)
chr22:46448110-46448624	PPARA (-98132), WNT7B (-75359)
chr22:46574612-46575061	PPARA (+28338), PKDREJ (+84382)
chr22:46840214-46840572	CELSR1 (+92674), TRMU (+109095)
chr22:46861509-46862395	CELSR1 (+71115), TRMU (+130654)
chr22:46862960-46863342	CELSR1 (+69916), TRMU (+131853)
chr22:46865532-46866282	CELSR1 (+67160), TRMU (+134609)
chr22:46887678-46888480	CELSR1 (+44988), TRMU (+156781)
chr22:46888494-46888748	CELSR1 (+44446), TRMU (+157323)
chr22:46970851-46971336	GRAMD4 (-51554), CELSR1 (-38027)
chr22:47331839-47332281	TBC1D22A (+173542)
chr22:47332433-47332903	TBC1D22A (+174150)
chr22:49881546-49881985	BRD1 (+336686), FAM19A5 (+996478)
chr22:50324635-50325029	PIM3 (-29311), CRELD2 (+12549)
chr22:50364318-50364747	PIM3 (+10390), MLC1 (+159248)
chr22:50465953-50466359	MLC1 (+57625), PIM3 (+112013)
chr3:3677913-3679192	CRBN (-457152), LRRN1 (-162568)
chr3:4722764-4723419	BHLHE40 (-298005), ITPR1 (+188060)
chr3:4728622-4731140	BHLHE40 (-291216), ITPR1 (+194849)
chr3:4755347-4756650	BHLHE40 (-265098), ITPR1 (+220967)
chr3:4757557-4757737	BHLHE40 (-263450), ITPR1 (+222615)
chr3:4762350-4763364	BHLHE40 (-258240), ITPR1 (+227825)
chr3:4798070-4798575	BHLHE40 (-222774), ITPR1 (+263291)
chr3:4811498-4812087	BHLHE40 (-209304), ITPR1 (+276761)
chr3:4818199-4819245	BHLHE40 (-202375), ITPR1 (+283690)
chr3:4824272-4824887	BHLHE40 (-196517), ITPR1 (+289548)
chr3:4828156-4828885	BHLHE40 (-192576), ITPR1 (+293489)
chr3:4863084-4863632	BHLHE40 (-157739), ITPR1 (+328326)
chr3:4889662-4890389	BHLHE40 (-131071), ITPR1 (+354994)
chr3:4920818-4921316	BHLHE40 (-100030), ITPR1 (+386035)
chr3:5101655-5102180	ARL8B (-62012), BHLHE40 (+80821)
chr3:8485891-8486552	LMCD1 (-57289)
chr3:8497934-8498942	LMCD1 (-45073)
chr3:8545441-8545943	CAV3 (-229794), LMCD1 (+2181)
chr3:9217076-9217560	RAD18 (-212159), SRGAP3 (+73993)
chr3:9236001-9236821	RAD18 (-231252), SRGAP3 (+54900)
chr3:11811534-11812349	VGLL4 (-126544), TAMM41 (+76410)
chr3:13517375-13518197	HDAC11 (-3929)
chr3:14265459-14265692	SLC6A6 (-178530), LSM3 (+45348)
chr3:14266443-14266906	SLC6A6 (-177431), LSM3 (+46447)
chr3:14290275-14291034	SLC6A6 (-153451), LSM3 (+70427)
chr3:14377633-14378419	SLC6A6 (-66080), LSM3 (+157798)
chr3:14454170-14455027	SLC6A6 (+10493), GRIP2 (+128989)
chr3:14455040-14455447	SLC6A6 (+11138), GRIP2 (+128344)
chr3:15334209-15335047	SH3BP5 (+39476), CAPN7 (+86895)
chr3:15405577-15406001	SH3BP5 (-31685), METTL6 (+63253)
chr3:15946413-15946829	GALNTL2 (-269563), ANKRD28 (-45568)
chr3:18708085-18708567	KCNH8 (-481691), SATB1 (-228061)
chr3:18710779-18711723	KCNH8 (-478766), SATB1 (-230986)
chr3:18808749-18810025	KCNH8 (-380630), SATB1 (-329122)
chr3:18814353-18815072	KCNH8 (-375304), SATB1 (-334448)
chr3:18815401-18815433	KCNH8 (-374600), SATB1 (-335152)
chr3:18815446-18816382	KCNH8 (-374103), SATB1 (-335649)
chr3:19029291-19030046	SATB1 (-549404), KCNH8 (-160348)
chr3:19030606-19031248	SATB1 (-550662), KCNH8 (-159090)
chr3:23362289-23362767	UBE2E1 (-484856), UBE2E2 (+117744)
chr3:24406617-24407224	THRB (+129392), NR1D2 (+420170)
chr3:24529264-24529734	THRB (+6814), NR1D2 (+542748)
chr3:24531519-24532097	THRB (+4505), NR1D2 (+545057)
chr3:25766278-25766819	TOP2B (-60718), NGLY1 (+58440)
chr3:27356051-27356913	NEK10 (+54430), LRRC3B (+692182)
chr3:27358470-27359121	NEK10 (+52116), LRRC3B (+694496)
chr3:27365984-27366726	NEK10 (+44557), LRRC3B (+702055)
chr3:27386830-27387527	NEK10 (+23733), LRRC3B (+722879)
chr3:27395574-27396126	NEK10 (+15062), LRRC3B (+731550)
chr3:29978705-29979196	TGFBR2 (-669043), RBMS3 (+656148)
chr3:32151611-32152313	CMTM8 (-128209), GPD1L (+3959)
chr3:32439582-32440137	CMTM7 (+6697), CMTM6 (+104543)
chr3:32461610-32462276	CMTM7 (+28780), CMTM6 (+82460)
chr3:32463420-32464153	CMTM7 (+30624), CMTM6 (+80616)
chr3:32479888-32480669	CMTM7 (+47116), CMTM6 (+64124)
chr3:32502417-32503003	CMTM6 (+41693), CMTM7 (+69547)
chr3:35549808-35550311	ARPP21 (-133789)
chr3:37794728-37795270	CTDSPL (-108670), ITGA9 (+301186)
chr3:37905665-37906197	VILL (-129147), CTDSPL (+2262)
chr3:39172013-39172477	CSRNP1 (+22857), TTC21A (+23093)
chr3:39174148-39174761	CSRNP1 (+20647), TTC21A (+25303)
chr3:39983341-39983822	EIF1B (-367591), MYRIP (+132279)
chr3:40024460-40025317	EIF1B (-326284), MYRIP (+173586)
chr3:40509374-40510130	ZNF619 (-8852), RPL14 (+10951)
chr3:42122077-42122521	ULK4 (-118639), TRAK1 (-10447)
chr3:42585915-42586969	SEC22C (+37078), VIPR1 (+42338)
chr3:43037965-43038716	FAM198A (+17582), C3orf39 (+109224)
chr3:47485054-47485555	SCAP (+32140), PTPN23 (+62814)
chr3:47528654-47529143	SCAP (-11454), C3orf75 (+26300)
chr3:48635698-48636086	COL7A1 (-3299)
chr3:48796981-48797428	IP6K2 (-42285), PRKAR2A (+88065)
chr3:50164269-50165336	SEMA3F (-28045), RBM5 (+38462)
chr3:50183885-50184412	SEMA3F (-8699), RBM5 (+57808)
chr3:50187930-50189237	SEMA3F (-4264)
chr3:52244681-52245123	ALAS1 (+12803), TLR9 (+20345)
chr3:52472395-52472760	SEMA3G (+6465), PHF7 (+28051)
chr3:53179139-53179751	PRKCD (-15778), RFT1 (-14975)
chr3:53184078-53184614	RFT1 (-19876), PRKCD (-10877)
chr3:53189741-53190317	RFT1 (-25559), PRKCD (-5194)
chr3:53552577-53553766	CACNA1D (+24141), CHDH (+327248)
chr3:53557186-53557917	CACNA1D (+28521), CHDH (+322868)
chr3:53625651-53625941	CACNA1D (+96765), CHDH (+254624)
chr3:55816282-55817105	WNT5A (-295363), ERC2 (+685697)
chr3:58025703-58026230	FLNB (+31840), DNASE1L3 (+174431)
chr3:58034895-58034947	FLNB (+40794), DNASE1L3 (+165477)
chr3:58082531-58083052	FLNB (+88665), DNASE1L3 (+117606)
chr3:58087269-58088269	FLNB (+93642), DNASE1L3 (+112629)
chr3:58088531-58089281	FLNB (+94779), DNASE1L3 (+111492)
chr3:58135091-58135458	DNASE1L3 (+65123), FLNB (+141148)
chr3:58452389-58453412	PDHB (-33322), KCTD6 (-24922)
chr3:58504075-58504544	ACOX2 (+18619), KCTD6 (+26487)
chr3:58843287-58843632	FAM3D (-190899)
chr3:58843712-58844283	FAM3D (-191437)
chr3:59649282-59649930	FAM3D (-997045)
chr3:59650148-59650575	FAM3D (-997801)
chr3:63918434-63919056	ATXN7 (+34670), PSMD6 (+90375)
chr3:63923326-63924065	ATXN7 (+39621), PSMD6 (+85424)
chr3:64160084-64160498	PSMD6 (-151171), PRICKLE2 (+50840)
chr3:66028279-66028906	MAGI1 (-4084)
chr3:66466278-66467359	LRIG1 (+84026), SLC25A26 (+347534)
chr3:66467733-66467947	LRIG1 (+83005), SLC25A26 (+348555)
chr3:66525724-66526382	LRIG1 (+24792), SLC25A26 (+406768)
chr3:66527497-66528057	LRIG1 (+23068), SLC25A26 (+408492)
chr3:66644311-66644819	LRIG1 (-93720)
chr3:67567225-67567337	SUCLG2 (+137757)
chr3:70787716-70787948	FOXP1 (+506484), MITF (+999246)
chr3:70852850-70852967	FOXP1 (+441407)
chr3:70852969-70853747	FOXP1 (+440958)
chr3:70854587-70855057	FOXP1 (+439494)
chr3:71159854-71160563	FOXP1 (+134107)
chr3:71553723-71554041	FOXP1 (-259566), EIF4E3 (+220644)
chr3:71922141-71922624	PROK2 (-88026), RYBP (+573391)
chr3:72170377-72170956	PROK2 (-336310), RYBP (+325107)
chr3:72772038-72772514	RYBP (-276502), SHQ1 (+125322)
chr3:72795553-72796609	RYBP (-300307), SHQ1 (+101517)
chr3:72799510-72799895	RYBP (-303929), SHQ1 (+97895)
chr3:73862370-73863177	PDZRN3 (-188702), CNTN3 (+707569)
chr3:77611953-77612692	ROBO2 (+523029)
chr3:78071307-78071784	ROBO2 (+982252)
chr3:97646341-97647024	MINA (+44612), CRYBG3 (+50864)
chr3:101496326-101496720	FAM55C (-1506)
chr3:103532737-103533379	NONE
chr3:104329617-104329878	ALCAM (-755809)
chr3:104330040-104330578	ALCAM (-755248)
chr3:107543366-107543958	CD47 (+266273), BBX (+301879)
chr3:107705368-107706481	CD47 (+104010), BBX (+464142)
chr3:110703609-110704264	PVRL3 (-86669)
chr3:111300834-111301463	ZBED2 (+13033), CD96 (+40223)
chr3:111500680-111501195	PHLDB2 (-77630), PLCXD2 (+107415)
chr3:112372371-112372811	CCDC80 (-12614), CD200R1L (+192206)
chr3:112958392-112958987	BOC (+27315), SPICE1 (+275344)
chr3:113255301-113256449	SIDT1 (+4657), KIAA2018 (+159618)
chr3:124017787-124018192	UMPS (-431223), KALRN (+204432)
chr3:124035719-124036560	UMPS (-413073), KALRN (+222582)
chr3:124552315-124553352	ITGB5 (+53310), UMPS (+103621)
chr3:124553372-124553397	ITGB5 (+52759), UMPS (+104172)
chr3:124560264-124560793	ITGB5 (+45615), UMPS (+111316)
chr3:124572163-124572724	ITGB5 (+33700), UMPS (+123231)
chr3:124597427-124597874	ITGB5 (+8493), UMPS (+148438)
chr3:124639576-124640009	ITGB5 (-33649), MUC13 (+13802)
chr3:124781202-124782732	HEG1 (-7165), SLC12A8 (+149642)
chr3:126831736-126832356	PLXNA1 (+124609), TPRA1 (+477522)
chr3:128054274-128054779	DNAJB8 (+131564), EEFSEC (+182214)
chr3:128142337-128142840	DNAJB8 (+43502), EEFSEC (+270276)
chr3:129228501-129229115	RHO (-18674), IFT122 (+69840)
chr3:129231422-129231981	RHO (-15780), IFT122 (+72734)
chr3:129381632-129382515	PLXND1 (-56492), TMCC1 (+217328)
chr3:129383540-129383872	PLXND1 (-58124), TMCC1 (+215696)
chr3:129392505-129393326	PLXND1 (-67334), TMCC1 (+206486)
chr3:129627091-129627708	TRH (-65714), TMCC1 (-27998)
chr3:129631555-129632076	TRH (-61298), TMCC1 (-32414)
chr3:132577249-132577874	TMEM108 (-179609), NPHP3 (-136259)
chr3:133105597-133105890	BFSP2 (-13046), TMEM108 (+348573)
chr3:133147271-133147835	CDV3 (-144881), BFSP2 (+28763)
chr3:133166874-133166977	CDV3 (-125508), BFSP2 (+48136)
chr3:133167216-133168157	CDV3 (-124747), BFSP2 (+48897)
chr3:133171418-133172488	CDV3 (-120481), BFSP2 (+53163)
chr3:133178040-133178919	CDV3 (-113954), BFSP2 (+59690)
chr3:133179300-133179420	CDV3 (-113074), BFSP2 (+60570)
chr3:134032671-134033184	RYK (-63342), AMOTL2 (+60478)
chr3:138195979-138196173	ESYT3 (+42661), CEP70 (+117053)
chr3:141073910-141074372	RASA2 (-131785), ZBTB38 (+31086)
chr3:141084800-141085699	RASA2 (-120676), ZBTB38 (+42195)
chr3:141086906-141087559	RASA2 (-118693), ZBTB38 (+44178)
chr3:141087787-141088313	RASA2 (-117876), ZBTB38 (+44995)
chr3:144100372-144100392	C3orf58 (+409742)
chr3:144102658-144103582	C3orf58 (+412480)
chr3:144174789-144175410	C3orf58 (+484460)
chr3:148942706-148943386	CP (-3214)
chr3:149788968-149789495	TSC22D2 (-337556), PFN2 (-100491)
chr3:150035303-150035770	PFN2 (-346796), TSC22D2 (-91251)
chr3:150453992-150454530	SIAH2 (+27002), SELT (+133195)
chr3:150454743-150455698	SIAH2 (+26042), SELT (+134155)
chr3:150462106-150463329	SIAH2 (+18545), SELT (+141652)
chr3:150473642-150475562	SIAH2 (+6661), SELT (+153536)
chr3:151022633-151023569	P2RY14 (-26871), GPR87 (+11535)
chr3:152687644-152688123	RAP2B (-192145), P2RY1 (+135148)
chr3:152858208-152858814	RAP2B (-21518), P2RY1 (+305775)
chr3:153777533-153778139	ARHGEF26 (-60956), RAP2B (+897807)
chr3:153936167-153937051	ARHGEF26 (+97817), DHX36 (+105677)
chr3:155935028-155935145	KCNAB1 (+96750), SSR3 (+337886)
chr3:155935287-155935979	KCNAB1 (+97296), SSR3 (+337340)
chr3:156391631-156392291	TIPARP (-2492)
chr3:156534575-156535726	TIPARP (+140698), CCNL1 (+343331)
chr3:156644282-156644783	CCNL1 (+233949), TIPARP (+250080)
chr3:156661159-156661687	CCNL1 (+217059), TIPARP (+266970)
chr3:156852425-156852843	CCNL1 (+25848), TIPARP (+458181)
chr3:156883987-156884700	PTX3 (-270236), CCNL1 (-5862)
chr3:159572168-159573075	IL12A (-134001), IQCJ-SCHIP1 (+785581)
chr3:159709821-159710029	C3orf80 (-233498), IL12A (+3302)
chr3:159710350-159711037	C3orf80 (-232729), IL12A (+4071)
chr3:160514228-160514988	PPM1L (+40612), B3GALNT1 (+308075)
chr3:161129788-161130702	OTOL1 (-84351), SPTSSB (-40374)
chr3:161138158-161139092	OTOL1 (-75971), SPTSSB (-48754)
chr3:164019700-164020365	SI (+776250)
chr3:168985693-168986915	MECOM (+395259)
chr3:169341286-169343025	MECOM (+39407)
chr3:169472322-169472938	MECOM (-91067), ARPM1 (+15053)
chr3:169587414-169588245	SEC62 (-96750), LRRC34 (-57256)
chr3:169589197-169589749	SEC62 (-95107), LRRC34 (-58899)
chr3:169666526-169667336	LRRC34 (-136357), SEC62 (-17649)
chr3:169671253-169672132	LRRC34 (-141119), SEC62 (-12887)
chr3:170524012-170525069	SLC7A14 (-220678), RPL22L1 (+63504)
chr3:171302822-171303749	TNIK (-125089), PLD1 (+225218)
chr3:171858091-171859208	FNDC3B (+101232), GHSR (+307596)
chr3:171864142-171864627	FNDC3B (+106967), GHSR (+301861)
chr3:173317016-173318244	NLGN1 (+201386)
chr3:174201575-174202960	NAALADL2 (-374843)
chr3:174667260-174668040	NAALADL2 (+90539)
chr3:174673044-174674959	NAALADL2 (+96891)
chr3:174690788-174691850	NAALADL2 (+114208)
chr3:176572602-176574656	TBL1XR1 (+341419)
chr3:176585487-176586619	TBL1XR1 (+328995)
chr3:176638525-176639273	TBL1XR1 (+276149)
chr3:176644950-176646850	TBL1XR1 (+269148)
chr3:176670972-176672411	TBL1XR1 (+243356)
chr3:177137925-177139301	TBL1XR1 (-223565)
chr3:177195985-177197186	TBL1XR1 (-281538)
chr3:177320196-177321118	KCNMB2 (-933567), TBL1XR1 (-405609)
chr3:177336399-177337716	KCNMB2 (-917166), TBL1XR1 (-422010)
chr3:177353202-177354158	KCNMB2 (-900544), TBL1XR1 (-438632)
chr3:177527754-177528585	KCNMB2 (-726054), TBL1XR1 (-613122)
chr3:177888358-177888916	TBL1XR1 (-973589), KCNMB2 (-365587)
chr3:178453758-178454556	KCNMB2 (+199933), ZMAT3 (+335499)
chr3:180013550-180014070	TTC14 (-306108), PEX5L (-259293)
chr3:181664957-181665899	ATP11B (-845863), SOX2 (+235716)
chr3:181989399-181989669	ATP11B (-521757), SOX2 (+559822)
chr3:182002463-182003279	ATP11B (-508420), SOX2 (+573159)
chr3:182403710-182404483	ATP11B (-107194), SOX2 (+974385)
chr3:182426142-182427405	ATP11B (-84517), SOX2 (+997062)
chr3:182456890-182457383	ATP11B (-54154)
chr3:182607512-182608425	DCUN1D1 (+90357), ATP11B (+96678)
chr3:183009172-183010052	B3GNT5 (+38580), MCF2L2 (+136243)
chr3:183012827-183014436	B3GNT5 (+42600), MCF2L2 (+132223)
chr3:183483104-183483610	MAP6D1 (+60036), YEATS2 (+67751)
chr3:183562406-183564181	MAP6D1 (-19901), PARL (+39399)
chr3:183725618-183726514	PARL (-123373), ABCC5 (+9661)
chr3:183728585-183729622	PARL (-126411), ABCC5 (+6623)
chr3:183730021-183730687	PARL (-127661), ABCC5 (+5373)
chr3:184267556-184268222	EPHB3 (-11698), CHRD (+170028)
chr3:185267497-185268104	TMEM41A (-50956), LIPH (+2568)
chr3:186478096-186478674	EIF4A2 (-22976), KNG1 (+43287)
chr3:187464784-187465248	BCL6 (-1503)
chr3:187498663-187499281	LPP (-431749), BCL6 (-35459)
chr3:187526205-187528490	LPP (-403373), BCL6 (-63835)
chr3:187634721-187635549	LPP (-295586), BCL6 (-171622)
chr3:187646262-187647217	LPP (-283981), BCL6 (-183227)
chr3:187749033-187749479	BCL6 (-285743), LPP (-181465)
chr3:187753940-187755254	BCL6 (-291084), LPP (-176124)
chr3:187778809-187779319	BCL6 (-315551), LPP (-151657)
chr3:187975139-187975733	TPRG1 (-914327), LPP (+44715)
chr3:188000479-188001601	TPRG1 (-888723), LPP (+70319)
chr3:188657758-188658299	TPRG1 (-231734), LPP (+727308)
chr3:188665241-188666115	TPRG1 (-224085), LPP (+734957)
chr3:188820679-188821571	TPRG1 (-68638), LPP (+890404)
chr3:188821954-188822649	TPRG1 (-67461), LPP (+891581)
chr3:189021133-189021870	TP63 (-327714), TPRG1 (+131739)
chr3:189021968-189023082	TP63 (-326691), TPRG1 (+132762)
chr3:189029103-189029804	TP63 (-319762), TPRG1 (+139691)
chr3:189034054-189034919	TP63 (-314729), TPRG1 (+144724)
chr3:189040063-189040767	TP63 (-308801), TPRG1 (+150652)
chr3:189042197-189042982	TP63 (-306626), TPRG1 (+152827)
chr3:189101292-189101909	TP63 (-247615), TPRG1 (+211838)
chr3:189176112-189176759	TP63 (-172780), TPRG1 (+286673)
chr3:189474320-189474884	TP63 (+125386), LEPREL1 (+364306)
chr3:189551766-189552225	TP63 (+202780), LEPREL1 (+286912)
chr3:189662598-189663122	LEPREL1 (+176048), TP63 (+313644)
chr3:189841776-189842213	LEPREL1 (-3087)
chr3:190024979-190025602	LEPREL1 (-186383), CLDN1 (+14944)
chr3:190525320-190526095	GMNC (+54757), IL1RAP (+293868)
chr3:192314451-192314849	HRASLS (-644268), FGF12 (-187812)
chr3:192315205-192316802	HRASLS (-642914), FGF12 (-189166)
chr3:192624633-192625394	FGF12 (-498176), HRASLS (-333904)
chr3:192625537-192626303	FGF12 (-499082), HRASLS (-332998)
chr3:193531066-193531817	HES1 (-322489), OPA1 (+220509)
chr3:193588016-193589124	HES1 (-265361), OPA1 (+277637)
chr3:193639955-193640839	HES1 (-213534), OPA1 (+329464)
chr3:193873815-193874374	HES1 (+20164), CPN2 (+197962)
chr3:193876020-193877466	HES1 (+22812), CPN2 (+195314)
chr3:193878667-193879422	HES1 (+25114), CPN2 (+193012)
chr3:193902031-193902783	HES1 (+48476), CPN2 (+169650)
chr3:193929366-193931371	HES1 (+76438), CPN2 (+141688)
chr3:193988100-193988835	CPN2 (+83589), HES1 (+134537)
chr3:194041361-194042022	CPN2 (+30365), HES1 (+187761)
chr3:194214749-194215410	ATP13A3 (-26112), TMEM44 (+139070)
chr3:194215442-194216636	ATP13A3 (-27071), TMEM44 (+138111)
chr3:194218385-194219492	ATP13A3 (-29971), TMEM44 (+135211)
chr3:195632720-195633588	TNK2 (-10722), SDHAP1 (+83996)
chr3:195641362-195642337	TNK2 (-19418), SDHAP1 (+75300)
chr3:195876658-195878034	TFRC (-68314), ZDHHC19 (+60954)
chr3:195899646-195900441	TFRC (-91012), ZDHHC19 (+38256)
chr3:196073991-196074589	TM4SF19 (-8999), UBXN7 (+85055)
chr3:196514405-196515272	SENP5 (-79888), PAK2 (+48111)
chr3:196533865-196535197	SENP5 (-60196), PAK2 (+67803)
chr4:611365-612242	ZNF721 (-118362), PDE6B (-7559)
chr4:795633-796020	CPLX1 (+24118), PCGF3 (+96254)
chr4:987528-988024	SLC26A1 (-552)
chr1:1008864-1010154	RNF223 (+178)
chr1:1607812-1608479	SLC35E2B (+16097), MMP23B (+40586)
chr1:1670627-1671275	CDK11B (-15176), SLC35E2 (+6487)
chr1:1790572-1791172	NADK (-79364), GNB1 (+31654)
chr1:1933190-1933681	TMEM52 (-82696), GABRD (-17332)
chr1:6217933-6218288	CHD5 (+22083), KCNAB2 (+112130)
chr1:6543108-6543673	TNFRSF25 (-17136), PLEKHG5 (+14093)
chr1:7507707-7508338	VAMP3 (-323306), CAMTA1 (+662639)
chr1:8031030-8031495	PARK7 (+9549), ERRFI1 (+55130)
chr1:8086339-8086656	ERRFI1 (-105)
chr1:8180489-8181598	SLC45A1 (-203346), ERRFI1 (-94651)
chr1:8229723-8230522	SLC45A1 (-154267), ERRFI1 (-143730)
chr1:8242214-8242897	ERRFI1 (-156163), SLC45A1 (-141834)
chr1:8262654-8263029	ERRFI1 (-176449), SLC45A1 (-121548)
chr1:8403461-8404176	SLC45A1 (+19429), RERE (+473880)
chr1:8451052-8451588	SLC45A1 (+66930), RERE (+426379)
chr1:8472462-8472973	SLC45A1 (+88328), RERE (+404981)
chr1:8730227-8730579	RERE (+147296), SLC45A1 (+346013)
chr1:8802045-8802598	RERE (+75377), SLC45A1 (+417932)
chr1:8849414-8850053	RERE (+27965), SLC45A1 (+465344)
chr1:9385871-9386284	SLC25A33 (-213450), SPSB1 (+33137)
chr1:9444682-9445060	SLC25A33 (-154657), SPSB1 (+91930)
chr1:10576241-10577022	PEX14 (+41629), CASZ1 (+280075)
chr1:10588380-10589596	PEX14 (+53985), CASZ1 (+267719)
chr1:10589841-10589982	PEX14 (+54909), CASZ1 (+266795)
chr1:10656988-10657275	PEX14 (+122129), CASZ1 (+199575)
chr1:10805990-10806479	CASZ1 (+50472), PEX14 (+271232)
chr1:10878709-10879048	TARDBP (-193800), CASZ1 (-22172)
chr1:11140228-11140868	SRM (-20457), EXOSC10 (+19390)
chr1:11434163-11435123	PTCHD2 (-104652), UBIAD1 (+101388)
chr1:11629662-11629994	FBXO2 (+85060), PTCHD2 (+90533)
chr1:12291127-12291875	VPS13D (+1388), DHRS3 (+386319)
chr1:12692967-12693417	DHRS3 (-15372), AADACL4 (-11374)
chr1:14753391-14753870	KAZN (-171582), PRDM2 (+722281)
chr1:16126495-16127498	UQCRHL (+7197), FBLIM1 (+41742)
chr1:17039796-17040224	NBPF1 (-100028), MST1P9 (+50965)
chr1:17630628-17631006	PADI4 (-3873)
chr1:17631023-17631344	PADI4 (-3506)
chr1:17640966-17641760	PADI6 (-57378), PADI4 (+6673)
chr1:17754661-17755504	RCC2 (+9976), PADI6 (+56342)
chr1:17891161-17891608	ACTL8 (-190423), ARHGEF10L (+25055)
chr1:19686827-19687247	PQLC2 (+48297), CAPZB (+125029)
chr1:19752163-19752405	CAPZB (+59782), PQLC2 (+113544)
chr1:19753524-19754286	CAPZB (+58161), PQLC2 (+115165)
chr1:21223387-21223759	HP1BP3 (-110392), EIF4G3 (+279808)
chr1:21578171-21578984	EIF4G3 (-75197), ECE1 (+38188)
chr1:21602716-21603293	EIF4G3 (-99624), ECE1 (+13761)
chr1:22781003-22781525	EPHA8 (-108740), ZBTB40 (+2920)
chr1:22795755-22796405	EPHA8 (-93924), ZBTB40 (+17736)
chr1:22798908-22799987	EPHA8 (-90556), ZBTB40 (+21104)
chr1:22813520-22814133	EPHA8 (-76177), ZBTB40 (+35483)
chr1:23799884-23800329	TCEA3 (-48846), ASAP3 (+10643)
chr1:24053937-24054434	TCEB3 (-15670), RPL11 (+35917)
chr1:24285613-24286133	PNRC2 (-428)
chr1:24745023-24745035	RCAN3 (-84358), NIPAL3 (+2784)
chr1:24894298-24895036	SRRM1 (-74927), C1orf130 (+12100)
chr1:25468635-25468985	RUNX3 (-212040), SYF2 (+90203)
chr1:25785178-25785652	LDLRAP1 (-84661), TMEM57 (+28027)
chr1:25802524-25803578	LDLRAP1 (-67025), TMEM57 (+45663)
chr1:25893187-25893677	MAN1C1 (-50527), LDLRAP1 (+23356)
chr1:25894554-25895019	MAN1C1 (-49172), LDLRAP1 (+24711)
chr1:26083585-26084466	SEPN1 (-42641), MAN1C1 (+140067)
chr1:27625948-27626499	TMEM222 (-22412), WDTC1 (+65217)
chr1:27868366-27869047	WASF2 (-52029), AHDC1 (+61436)
chr1:28640464-28640994	MED18 (-14784), SESN2 (+54766)
chr1:31730851-31732075	NKAIN1 (-18729), SNRNP40 (+11050)
chr1:32308206-32309076	SPOCD1 (-27061), PTP4A2 (+95347)
chr1:32376528-32376972	SPOCD1 (-95170), PTP4A2 (+27238)
chr1:32396889-32398446	SPOCD1 (-116088), PTP4A2 (+6320)
chr1:32879455-32879909	ZBTB8B (-50976), TSSK3 (+51820)
chr1:33842494-33842978	PHC2 (-1542)
chr1:35253189-35253568	GJA4 (-5220), GJB3 (+5468)
chr1:35729430-35729905	ZMYM4 (-4900)
chr1:35730379-35730972	ZMYM4 (-3892)
chr1:36321111-36321299	EIF2C1 (-27605), EIF2C4 (+47377)
chr1:36734657-36735362	THRAP3 (+44993), FAM176B (+54745)
chr1:36874038-36874436	LSM10 (-10744), OSCP1 (+41849)
chr1:37503831-37504921	GRIK3 (-4532)
chr1:37950201-37950608	ZC3H12A (+10286), MEAF6 (+29959)
chr1:37999892-38000463	MEAF6 (-19814), SNIP1 (+19725)
chr1:38273168-38273589	YRDC (+486)
chr1:38283193-38283425	YRDC (-9444), MTF1 (+41983)
chr1:39194683-39195060	POU3F1 (-682422), RRAGC (+130468)
chr1:40425948-40426322	CAP1 (-80120), MFSD2A (+5351)
chr1:40446094-40446843	CAP1 (-59786), MFSD2A (+25685)
chr1:40490324-40490849	CAP1 (-15668), MFSD2A (+69803)
chr1:40496071-40496802	CAP1 (-9818), MFSD2A (+75653)
chr1:40772074-40772411	COL9A2 (+10738), ZMPSTE24 (+48510)
chr1:40847744-40848148	ZNF643 (-68391), SMAP2 (+8568)
chr1:41333982-41334307	CTPS (-110862), CITED4 (-6127)
chr1:41363798-41364824	CTPS (-80696), CITED4 (-36293)
chr1:41364935-41365609	CTPS (-79735), CITED4 (-37254)
chr1:41384997-41385562	CTPS (-59727), CITED4 (-57262)
chr1:41395839-41396148	CITED4 (-67976), CTPS (-49013)
chr1:41409983-41410476	CITED4 (-82212), CTPS (-34777)
chr1:41410557-41411032	CITED4 (-82777), CTPS (-34212)
chr1:41511384-41511856	SLFNL1 (-24193), SCMH1 (+196195)
chr1:41512006-41512542	SLFNL1 (-24847), SCMH1 (+195541)
chr1:41904237-41904790	SCMH1 (-196699), EDN2 (+45830)
chr1:42268657-42268778	EDN2 (-318374), HIVEP3 (+115778)
chr1:42325669-42326893	EDN2 (-375937), HIVEP3 (+58215)
chr1:42331722-42332505	EDN2 (-381770), HIVEP3 (+52382)
chr1:42333728-42334501	EDN2 (-383771), HIVEP3 (+50381)
chr1:42344179-42344442	EDN2 (-393967), HIVEP3 (+40185)
chr1:42631160-42631972	GUCA2A (-1171)
chr1:43427422-43427827	SLC2A1 (-2778)
chr1:43457835-43458519	SLC2A1 (-33330), EBNA1BP2 (+180064)
chr1:43672469-43672962	TMEM125 (-62949), EBNA1BP2 (-34475)
chr1:43701424-43701803	EBNA1BP2 (-63373), TMEM125 (-34051)
chr1:44236280-44236890	ARTN (-162407), ST3GAL3 (+63367)
chr1:44323845-44324336	ARTN (-74901), ST3GAL3 (+150873)
chr1:47222442-47224145	CYP4B1 (-41376), KIAA0494 (-38558)
chr1:47273037-47273417	CYP4B1 (+8557), CYP4A11 (+133929)
chr1:47496459-47497183	CYP4Z1 (-36339), CYP4X1 (+7581)
chr1:47942900-47943143	FOXD2 (+41333), LOC388630 (+519540)
chr1:47943624-47944244	FOXD2 (+42245), LOC388630 (+518628)
chr1:48360330-48360840	LOC388630 (+101977), FOXD2 (+458896)
chr1:51772533-51773163	TTC39A (+37937), RNF11 (+70903)
chr1:51786854-51787612	TTC39A (+23552), RNF11 (+85288)
chr1:51789825-51790442	TTC39A (+20651), RNF11 (+88189)
chr1:51794849-51795543	TTC39A (+15589), RNF11 (+93251)
chr1:52033028-52033869	OSBPL9 (-49097), EPS15 (-48454)
chr1:52037920-52038500	EPS15 (-53215), OSBPL9 (-44336)
chr1:52126332-52126956	OSBPL9 (+44098), NRD1 (+217965)
chr1:53415192-53415554	PODN (-112351), SCP2 (+22472)
chr1:54407922-54408559	HSPB11 (+3047), DIO1 (+48380)
chr1:54868318-54868867	SSBP3 (+3499), MRPL37 (+202753)
chr1:55353928-55354425	DHCR24 (-1256)
chr1:57253298-57253476	C8A (-67056), PRKAA2 (+142397)
chr1:57253720-57254603	C8A (-66281), PRKAA2 (+143172)
chr1:57276868-57277401	C8A (-43308), PRKAA2 (+166145)
chr1:60322321-60323002	HOOK1 (+42129), CYP2J2 (+69761)
chr1:61607085-61607766	NFIA (+59892), TM2D1 (+583669)
chr1:61608651-61609149	NFIA (+61366), TM2D1 (+582195)
chr1:61609346-61609605	NFIA (+61942), TM2D1 (+581619)
chr1:61649116-61649908	NFIA (+101978), TM2D1 (+541583)
chr1:61759622-61759835	NFIA (+212195), TM2D1 (+431366)
chr1:61759930-61760054	NFIA (+212458), TM2D1 (+431103)
chr1:61787540-61788179	NFIA (+240326), TM2D1 (+403235)
chr1:61788422-61788860	NFIA (+241107), TM2D1 (+402454)
chr1:61803614-61804216	NFIA (+256381), TM2D1 (+387180)
chr1:61804361-61805056	NFIA (+257175), TM2D1 (+386386)
chr1:62107959-62109033	TM2D1 (+82599), NFIA (+560962)
chr1:65338069-65338490	JAK1 (+93907), RAVER2 (+127502)
chr1:65344467-65345398	JAK1 (+87254), RAVER2 (+134155)
chr1:65363751-65364139	JAK1 (+68242), RAVER2 (+153167)
chr1:65364156-65364683	JAK1 (+67767), RAVER2 (+153642)
chr1:65366584-65366972	JAK1 (+65409), RAVER2 (+156000)
chr1:66731928-66732364	SGIP1 (-267679), PDE4B (+473290)
chr1:71339634-71340332	PTGER3 (+173508), CTH (+463082)
chr1:71340355-71340598	PTGER3 (+173014), CTH (+463576)
chr1:75117916-75118933	TYW3 (-80411), FPGT-TNNI3K (+454529)
chr1:79756588-79757537	ELTD1 (-284568)
chr1:79983052-79983620	ELTD1 (-510841)
chr1:81472778-81473165	LPHN2 (-793110)
chr1:81473953-81474045	LPHN2 (-792083)
chr4:1556567-1557066	FAM53A (+129171), CRIPAK (+171477)
chr4:1814811-1815273	FGFR3 (+20003), LETM1 (+42932)
chr4:3112953-3113824	RGS12 (-202485), HTT (+36981)
chr4:3113897-3114441	RGS12 (-201705), HTT (+37761)
chr4:3124869-3125656	RGS12 (-190611), HTT (+48855)
chr4:3365940-3366322	HGFAC (-77595), RGS12 (+50257)
chr4:3461642-3462180	DOK7 (-3122)
chr4:4627110-4627716	MSX1 (-233979), STX18 (-83638)
chr4:4645433-4646022	MSX1 (-215664), STX18 (-101953)
chr4:6634710-6635532	MRFAP1 (-7324), MAN2B2 (+58219)
chr4:6689682-6690322	S100P (-5564), MRFAP1 (+47557)
chr4:6697347-6697902	CNO (-20217), S100P (+2059)
chr4:6748380-6749874	KIAA0232 (-35332), CNO (+31285)
chr4:6751138-6751680	KIAA0232 (-33050), CNO (+33567)
chr4:6752568-6753208	KIAA0232 (-31571), CNO (+35046)
chr4:6753337-6753724	KIAA0232 (-30928), CNO (+35689)
chr4:6781918-6782420	KIAA0232 (-2290)
chr4:6918296-6918727	TADA2B (-126644), TBC1D14 (+7017)
chr4:6919303-6919866	TADA2B (-125571), TBC1D14 (+8090)
chr4:6958814-6959333	TADA2B (-86082), TBC1D14 (+47579)
chr4:7047319-7048050	TADA2B (+2529), GRPEL1 (+22115)
chr4:7834221-7835179	PSAPL1 (-398000), AFAP1 (+106953)
chr4:10007818-10008265	SLC2A9 (+15072), DRD5 (+224784)
chr4:16035533-16036457	FGFBP2 (-71136), PROM1 (+41746)
chr4:16142249-16143112	PROM1 (-64940), TAPT1 (+85480)
chr4:17684739-17685098	MED28 (+68646), DCAF16 (+127462)
chr4:17702079-17703360	MED28 (+86447), DCAF16 (+109661)
chr4:17755014-17755891	DCAF16 (+56928), MED28 (+139180)
chr4:23328669-23329200	PPARGC1A (+562765), GBA3 (+634387)
chr4:23369752-23370372	PPARGC1A (+521638), GBA3 (+675514)
chr4:24596608-24597126	SOD3 (-200218), DHX15 (-10683)
chr4:24597182-24597784	SOD3 (-199602), DHX15 (-11299)
chr4:24765270-24766200	DHX15 (-179551), SOD3 (-31350)
chr4:24796694-24797194	SOD3 (-141)
chr4:28261219-28262014	NONE
chr4:28315442-28316435	NONE
chr4:30868515-30869014	PCDH7 (+146728)
chr4:35254799-35255435	ARAP2 (+990862)
chr4:37443222-37444022	RELL1 (+244377)
chr4:37451731-37452564	RELL1 (+235851)
chr4:37455829-37456666	RELL1 (+231751)
chr4:37463198-37464291	RELL1 (+224254)
chr4:37470969-37472166	RELL1 (+216431)
chr4:37473311-37474435	RELL1 (+214126)
chr4:37524565-37525006	RELL1 (+163213)
chr4:37543866-37544270	RELL1 (+143931)
chr4:37649716-37650189	RELL1 (+38046)
chr4:40191591-40192200	LOC344967 (-133077), RHOH (-6631)
chr4:40192365-40192830	LOC344967 (-133779), RHOH (-5929)
chr4:40193131-40193548	LOC344967 (-134521), RHOH (-5187)
chr4:40202302-40202914	CHRNA9 (-134861), RHOH (+4081)
chr4:40365345-40366159	CHRNA9 (+28283), RBM47 (+266131)
chr4:40550340-40550714	RBM47 (+81356), CHRNA9 (+213058)
chr4:40552981-40553485	RBM47 (+78650), CHRNA9 (+215764)
chr4:40589578-40590321	RBM47 (+41933), CHRNA9 (+252481)
chr4:41145082-41145943	APBB2 (+71122), NSUN7 (+393599)
chr4:41321003-41321998	LIMCH1 (-41303), UCHL1 (+62603)
chr4:41613833-41614183	PHOX2B (+136979), LIMCH1 (+251204)
chr4:47693743-47694385	CORIN (+145995), ATP10D (+206654)
chr4:48956712-48957202	OCIAD2 (-48142), CWH43 (-31308)
chr4:55709709-55709968	KIT (+185744), KDR (+281923)
chr4:60496157-60496397	NONE
chr4:61933007-61933466	LPHN3 (-429602)
chr4:65004594-65005229	TECRL (+270266)
chr4:65005347-65006049	TECRL (+269480)
chr4:67615986-67616382	CENPC1 (+795072)
chr4:68577700-68578045	UBA6 (-10984), GNRHR (+43931)
chr4:69730765-69731412	UGT2B10 (+49376), UGT2A3 (+86420)
chr4:75338801-75339648	AREG (+28372), BTC (+380657)
chr4:75340555-75341270	AREG (+30060), BTC (+378969)
chr4:75345934-75346662	AREG (+35445), BTC (+373584)
chr4:75586852-75587124	BTC (+132894), AREG (+276135)
chr4:77484518-77485136	SEPT11 (-386068), SHROOM3 (+128574)
chr4:77492360-77493140	SEPT11 (-378145), SHROOM3 (+136497)
chr4:77532301-77533236	SEPT11 (-338126), SHROOM3 (+176516)
chr4:78067432-78068284	CCNI (-70733), CCNG2 (-10499)
chr4:78485299-78485971	CXCL13 (+52728), CNOT6L (+254909)
chr4:79490295-79490473	BMP2K (-207148), ANXA3 (+17642)
chr4:84129925-84130377	COQ2 (+75916), COPS4 (+173912)
chr4:87863409-87863996	AFF1 (+7549), HSD17B13 (+380353)
chr4:88010479-88010910	AFF1 (+154541), HSD17B13 (+233361)
chr4:88042053-88042599	AFF1 (+186172), HSD17B13 (+201730)
chr4:88042805-88043147	AFF1 (+186822), HSD17B13 (+201080)
chr4:89098998-89099430	ABCG2 (-19203), PPM1K (+106674)
chr4:89239722-89240551	HERC6 (-59754), PPM1K (-34249)
chr4:89241596-89242649	HERC6 (-57768), PPM1K (-36235)
chr4:89255810-89256685	PPM1K (-50360), HERC6 (-43643)
chr4:92392418-92392760	GRID2 (-832961)
chr4:95848179-95848450	BMPR1B (+169187), UNC5C (+622046)
chr4:96171831-96172264	UNC5C (+298313), BMPR1B (+492920)
chr4:98417771-98418077	RAP1GDS1 (-764603)
chr4:99493736-99494161	TSPAN5 (+85863), RAP1GDS1 (+311422)
chr4:99538918-99539513	TSPAN5 (+40596), RAP1GDS1 (+356689)
chr4:102259821-102260170	EMCN (-820746), PPP3CA (+8632)
chr4:102785604-102786512	BANK1 (+74294), SLC39A8 (+480597)
chr4:102786670-102787354	BANK1 (+75248), SLC39A8 (+479643)
chr4:102793469-102793975	BANK1 (+81958), SLC39A8 (+472933)
chr4:102806634-102807118	BANK1 (+95112), SLC39A8 (+459779)
chr4:102842401-102842981	BANK1 (+130927), SLC39A8 (+423964)
chr4:102852617-102853166	BANK1 (+141128), SLC39A8 (+413763)
chr4:102874261-102874672	BANK1 (+162703), SLC39A8 (+392188)
chr4:102875044-102875543	BANK1 (+163530), SLC39A8 (+391361)
chr4:106473007-106473988	ARHGEF38 (-279)
chr4:106506990-106507819	ARHGEF38 (+33628), INTS12 (+122476)
chr4:106915175-106915634	NPNT (+98808), TBCK (+322018)
chr4:106983048-106983194	NPNT (+166524), TBCK (+254302)
chr4:106983363-106984200	NPNT (+167185), TBCK (+253641)
chr4:106984266-106984408	NPNT (+167740), TBCK (+253086)
chr4:108604985-108605539	DKK2 (-647809), PAPSS1 (+36157)
chr4:108974526-108975102	HADH (+63944), LEF1 (+115298)
chr4:108979791-108980339	HADH (+69195), LEF1 (+110047)
chr4:109185885-109186336	RPL34 (-355611), LEF1 (-95999)
chr4:112881272-112881840	C4orf32 (-184997)
chr4:115021441-115022024	UGT8 (-497878), ARSJ (-120855)
chr4:116576677-116577230	NDST4 (-541922)
chr4:116585195-116585890	NDST4 (-550511)
chr4:117570857-117571414	TRAM1L1 (+435600)
chr4:117598054-117598357	TRAM1L1 (+408530)
chr4:119678996-119679367	METTL14 (+72608), SEC24D (+78144)
chr4:120001788-120002885	MYOZ2 (-54602), SYNPO2 (+192341)
chr4:120501558-120501905	FABP2 (-258416), AX746903 (-47213)
chr4:123764126-123764498	FGF2 (+16449), NUDT6 (+79449)
chr4:124399737-124400732	SPRY1 (+82279)
chr4:129153786-129154250	PGRMC2 (+55966), LARP1B (+171515)
chr4:139818798-139819779	SLC7A11 (-655786), CCRN4L (-117654)
chr4:139831448-139832606	SLC7A11 (-668524), CCRN4L (-104916)
chr4:139833046-139834514	SLC7A11 (-670277), CCRN4L (-103163)
chr4:140940342-140940833	MAML3 (+134645), MGST2 (+353666)
chr4:140941059-140941495	MAML3 (+133956), MGST2 (+354355)
chr4:140958427-140959074	MAML3 (+116482), MGST2 (+371829)
chr4:140959180-140959713	MAML3 (+115786), MGST2 (+372525)
chr4:141226137-141226749	MAML3 (-151210), SCOC (-38154)
chr4:143274820-143275699	INPP4B (+492344), IL15 (+717511)
chr4:143516622-143517018	INPP4B (+250784), IL15 (+959071)
chr4:143518268-143518716	INPP4B (+249112), IL15 (+960743)
chr4:143521987-143522664	INPP4B (+245278), IL15 (+964577)
chr4:145658240-145658391	ABCE1 (-360840), HHIP (+91168)
chr4:146254891-146255516	OTUD4 (-154372), SMAD1 (-147747)
chr4:151001930-151002338	MAB21L2 (-500943), DCLK2 (+2708)
chr4:151136726-151137253	MAB21L2 (-366087), DCLK2 (+137564)
chr4:151153104-151153561	MAB21L2 (-349744), DCLK2 (+153907)
chr4:157030126-157030570	CTSO (-155300), PDGFC (+862198)
chr4:158236438-158236818	GRIA2 (+94892), FAM198B (+857574)
chr4:158284161-158285011	GRIA2 (+142850), FAM198B (+809616)
chr4:159097600-159097724	FAM198B (-3460)
chr4:159097823-159098448	FAM198B (-3934)
chr4:159098570-159098826	FAM198B (-4496)
chr4:159726733-159727116	RAPGEF2 (-462073), FNIP2 (+36743)
chr4:160150273-160150846	RAPGEF2 (-38438), FNIP2 (+460378)
chr4:165161004-165161476	TKTL2 (-766193), MARCH1 (+143167)
chr4:166544812-166545223	TLL1 (-249392), CPE (+244921)
chr4:169600603-169601528	PALLD (+182849), CBR4 (+330402)
chr4:169990991-169991643	CBR4 (-59849), SH3RF1 (+200932)
chr4:170863616-170864020	C4orf27 (-184725), MFAP3L (+83611)
chr4:173730438-173730873	GALNT7 (-359248), GALNTL6 (+996081)
chr4:173959540-173960103	GALNT7 (-130082)
chr1:81630011-81630641	LPHN2 (-635756)
chr1:85225327-85225942	SSX2IP (-69395), LPAR3 (+133261)
chr1:85293198-85293582	SSX2IP (-137150), LPAR3 (+65506)
chr1:85295621-85296063	SSX2IP (-139602), LPAR3 (+63054)
chr1:85763308-85764339	BCL10 (-21237), DDAH1 (+167065)
chr1:85779611-85780049	BCL10 (-37243), DDAH1 (+151059)
chr1:87258740-87259273	SH3GLB1 (+88754), SEP15 (+121100)
chr1:88153457-88154340	PKN2 (-996023), LMO4 (+359748)
chr1:88183600-88184618	PKN2 (-965813), LMO4 (+389958)
chr1:92045415-92045743	HSP90B3P (-54989), CDC7 (+79175)
chr1:92202312-92203203	HSP90B3P (+102190), TGFBR3 (+149078)
chr1:93865290-93865942	FNBP1L (-48072), DR1 (+54138)
chr1:94064036-94064446	BCAR3 (+83144), FNBP1L (+150553)
chr1:94064612-94065001	BCAR3 (+82578), FNBP1L (+151119)
chr1:94245043-94245736	BCAR3 (-98005), DNTTIP2 (+99372)
chr1:94583304-94584088	GCLM (-208684), ABCA4 (+3009)
chr1:94715897-94716263	ABCD3 (-167853), ARHGAP29 (-12773)
chr1:94791125-94791627	ABCD3 (-92557), ARHGAP29 (-88069)
chr1:94888444-94889043	ABCD3 (+4811), F3 (+118669)
chr1:95459112-95460230	CNN3 (-66936), ALG14 (+78836)
chr1:95479608-95480041	CNN3 (-87090), ALG14 (+58682)
chr1:99923149-99923701	PALMD (-188006), LPPR4 (+193577)
chr1:100951390-100951957	GPR88 (-52054), CDC14A (+133651)
chr1:108135637-108137028	VAV3 (+371212), NTNG1 (+453704)
chr1:108168788-108169593	VAV3 (+338354), NTNG1 (+486562)
chr1:108186218-108186893	VAV3 (+320989), NTNG1 (+503927)
chr1:108219032-108219568	VAV3 (+288245), NTNG1 (+536671)
chr1:108281089-108281981	VAV3 (+226010), NTNG1 (+598906)
chr1:108309360-108310762	VAV3 (+197484), NTNG1 (+627432)
chr1:108778005-108778330	SLC25A24 (-35194), NBPF4 (+8535)
chr1:108779777-108780897	SLC25A24 (-37363), NBPF4 (+6366)
chr1:108924214-108925348	NBPF4 (-138078), NBPF6 (-68123)
chr1:108998743-108999666	NBPF6 (+6301), HENMT1 (+204539)
chr1:109431815-109432195	GPSM2 (+12402), CLCC1 (+74106)
chr1:109638808-109639408	KIAA1324 (-17477), TMEM167B (+5705)
chr1:109693659-109694584	SARS (-62393), KIAA1324 (+37537)
chr1:109694724-109695311	SARS (-61497), KIAA1324 (+38433)
chr1:110266696-110267384	GSTM5 (+12176), GSTM3 (+16620)
chr1:110267587-110269017	GSTM5 (+13438), GSTM3 (+15358)
chr1:110421826-110422306	EPS8L3 (-115422), CSF1 (-31167)
chr1:110778262-110779173	RBM15 (-103227), KCNC4 (+25382)
chr1:110867263-110867653	RBM15 (-14487), KCNC4 (+114122)
chr1:111743145-111743534	DRAM2 (-60502), CHI3L2 (-26941)
chr1:113004968-113005345	WNT2B (-46213), CTTNBP2NL (+66357)
chr1:113824257-113824522	MAGI3 (-109085), LRIG2 (+208559)
chr1:114518974-114519917	OLFML3 (-2584)
chr1:114521745-114522203	OLFML3 (-56)
chr1:114576550-114577142	OLFML3 (+54816), SYT6 (+119626)
chr1:116557790-116558574	ATP1A1 (-357613), SLC22A15 (+39063)
chr1:116854524-116855031	ATP1A1 (-61017), SLC22A15 (+335659)
chr1:116996115-116996563	ATP1A1 (+80544), CD58 (+117376)
chr1:117216663-117217158	CD2 (-80175), IGSF3 (-6597)
chr1:117217239-117217797	CD2 (-79568), IGSF3 (-7204)
chr1:117811332-117812093	MAN1A2 (-98372), VTCN1 (-58131)
chr1:118105279-118105617	MAN1A2 (+195363), GDAP2 (+366854)
chr1:118623875-118624538	SPAG17 (+103641), WDR3 (+151835)
chr1:120287609-120288342	HMGCS2 (+23579), PHGDH (+33557)
chr1:120324986-120325553	HMGCS2 (-13715), REG4 (+28933)
chr1:120325910-120326041	HMGCS2 (-14421), REG4 (+28227)
chr1:120329015-120329457	HMGCS2 (-17681), REG4 (+24967)
chr1:120332975-120333919	HMGCS2 (-21892), REG4 (+20756)
chr1:120436447-120436768	NBPF7 (-48829), ADAM30 (+2539)
chr1:120511225-120511624	ADAM30 (-72278), NOTCH2 (+100892)
chr1:120539547-120540061	ADAM30 (-100657), NOTCH2 (+72513)
chr1:120573997-120575461	ADAM30 (-135582), NOTCH2 (+37588)
chr1:120587240-120588006	ADAM30 (-148476), NOTCH2 (+24694)
chr1:120604000-120605378	ADAM30 (-165542), NOTCH2 (+7628)
chr1:144157306-144158204	PPIAL4G (-389874), PPIAL4A (+206491)
chr1:144822069-144823401	PPIAL4A (-458489), PDE4DIP (+172298)
chr1:145218715-145219739	NBPF10 (-74144), NOTCH2NL (+10116)
chr1:145233618-145234200	NBPF10 (-59462), NOTCH2NL (+24798)
chr1:145245483-145247398	NBPF10 (-46930), NOTCH2NL (+37330)
chr1:145310067-145311228	HFE2 (-102543), NBPF10 (+17277)
chr1:145543585-145544372	PIAS3 (-32009), ITGA10 (+18989)
chr1:145723446-145724113	PDZK1 (-3886)
chr1:146039749-146040890	KIAA1245 (-293870), PDZK1 (-105813)
chr1:146233243-146234363	PDZK1 (-299296), KIAA1245 (-100387)
chr1:146418439-146419473	KIAA1245 (+84766), PRKAB2 (+225173)
chr1:146585530-146587062	PRKAB2 (+57833), KIAA1245 (+252106)
chr1:147022845-147023199	BCL9 (+9840), ACP6 (+119612)
chr1:148016381-148017356	PPIAL4A (-61450), NBPF14 (+8994)
chr1:148328955-148330058	NBPF15 (-231340), PPIAL4F (-126971)
chr1:148588030-148589084	PPIAL4E (-55454), NBPF15 (+27710)
chr1:148750109-148751169	PPIAL4F (-55376), NBPF16 (+11197)
chr1:151486308-151487089	TUFT1 (-26082), CGN (+2837)
chr1:151519243-151520144	SNX27 (-64968), TUFT1 (+6913)
chr1:151554386-151554929	SNX27 (-30004), TUFT1 (+41877)
chr1:152020058-152021264	S100A11 (-11150), TCHHL1 (+40879)
chr1:152715096-152716360	KPRP (-14778), C1orf68 (+23730)
chr1:153336469-153337096	S100A9 (+6453), S100A12 (+11292)
chr1:153337297-153338310	S100A9 (+7474), S100A12 (+10271)
chr1:153580268-153581042	S100A2 (-42349), S100A16 (+4859)
chr1:155160962-155161876	MUC1 (+1287), TRIM46 (+15059)
chr1:155621088-155621696	DAP3 (-37490), MSTO1 (+41385)
chr1:156018723-156019178	SSR2 (-28193), UBQLN4 (+4565)
chr1:156441229-156441896	C1orf61 (-42223), MEF2D (+28966)
chr1:156586216-156586699	HAPLN2 (-2628)
chr1:157101867-157102921	ETV3L (-32794), ETV3 (+5989)
chr1:157330729-157331269	ETV3 (-222616), FCRL5 (+191311)
chr1:161214745-161214997	NR1I3 (-6871), MPZ (+64891)
chr1:161536030-161536452	HSPA7 (-39608), FCGR3A (-16423)
chr1:162135239-162135966	NOS1AP (+96022), SH2D1B (+246325)
chr1:162358256-162358592	SH2D1B (+23504), NOS1AP (+318843)
chr1:164449932-164450580	PBX1 (-78341)
chr1:164548560-164549047	PBX1 (+20207), LMX1A (+776674)
chr1:167535111-167535824	MPZL1 (-155719), CREG1 (-12412)
chr1:167880387-167881247	ADCY10 (+2636), MPZL1 (+189630)
chr1:167883137-167884052	ADCY10 (-142)
chr1:167895775-167896215	ADCY10 (-12542), DCAF6 (-9802)
chr1:168578158-168578793	XCL1 (+32765), DPT (+119966)
chr1:168590532-168591295	XCL1 (+45203), DPT (+107528)
chr1:168600526-168601293	XCL1 (+55199), DPT (+97532)
chr1:168908798-168909173	DPT (-210544), ATP1B1 (-166961)
chr1:169454900-169455650	SLC19A2 (-67)
chr1:171179537-171179826	FMO1 (-37981), FMO2 (+25294)
chr1:172715444-172716019	FASLG (+87547), TNFSF18 (+304371)
chr1:173446029-173446340	PRDX6 (-301)
chr1:173837660-173838536	ZBTB37 (+605)
chr1:174934953-174935594	CACYBP (-33618), GPR52 (+518062)
chr1:175147158-175148139	TNN (+110655), TNR (+565103)
chr1:178974538-178975261	ANGPTL1 (-134685), FAM20B (-20174)
chr1:181088107-181088939	CACNA1E (-364163), MR1 (+85962)
chr1:182187075-182187536	ZNF648 (-156459), GLUL (+173233)
chr1:182379532-182380197	RGSL1 (-39391), TEDDM1 (-10114)
chr1:182937931-182938938	LAMC1 (-54160), DHX9 (+129996)
chr1:183249964-183251463	LAMC2 (+95540), NMNAT2 (+136920)
chr1:183574132-183575692	NCF2 (-14856), ARPC5 (+30073)
chr1:184591340-184591835	EDEM3 (+132453), TSEN15 (+570777)
chr1:184601870-184602400	EDEM3 (+121906), TSEN15 (+581324)
chr1:184898922-184899471	EDEM3 (-175156), FAM129A (+44485)
chr1:185503951-185504319	IVNS1ABP (-217674), HMCN1 (-199548)
chr1:185614839-185615189	IVNS1ABP (-328553), HMCN1 (-88669)
chr1:185615323-185615764	IVNS1ABP (-329083), HMCN1 (-88139)
chr1:195863478-195864029	KCNT2 (+713745)
chr1:197099763-197100609	F13B (-63789), ASPM (+15638)
chr1:197632435-197633004	DENND1B (+111903), CRB1 (+395386)
chr1:197752538-197753233	LHX9 (-133631), DENND1B (-8263)
chr1:198197892-198198480	NEK7 (+72078), ATP6V1G3 (+311889)
chr1:199985762-199986586	NR5A2 (-10596)
chr1:200083487-200084194	FAM58BP (-98815), NR5A2 (+87071)
chr1:200265120-200265893	FAM58BP (+82851), ZNF281 (+113659)
chr1:200306234-200306746	ZNF281 (+72676), FAM58BP (+123834)
chr1:200340981-200341697	ZNF281 (+37827), FAM58BP (+158683)
chr1:200341824-200342404	ZNF281 (+37052), FAM58BP (+159458)
chr1:202101008-202102190	GPR37L1 (+9570), ARL8A (+12267)
chr1:203058015-203059228	MYOG (-3245)
chr1:203069515-203070099	ADORA1 (-27029), MYOG (-14430)
chr1:203180103-203180654	CHI3L1 (-24457), CHIT1 (+18481)
chr1:203379264-203380230	PRELP (-65136), FMOD (-59458)
chr1:203391618-203392361	FMOD (-71701), PRELP (-52893)
chr1:203883391-203883942	SOX13 (-158579), SNRPE (+52927)
chr1:203900999-203901730	SOX13 (-140881), SNRPE (+70625)
chr1:204114381-204114992	ETNK2 (+6620), SOX13 (+72441)
chr1:204349378-204350335	GOLT1A (-166637), PPP1R15B (+31087)
chr1:204531744-204532473	MDM4 (+46602), LRRN2 (+122488)
chr1:206970298-206970776	IL19 (-1678)
chr4:173960704-173961169	GALNT7 (-128967)
chr4:182592228-182592754	ODZ3 (-652608)
chr4:182622866-182623083	ODZ3 (-622124)
chr4:182877532-182878866	ODZ3 (-366900)
chr4:183159341-183159886	ODZ3 (-85485)
chr4:184051555-184052330	WWC2 (+31480), CLDN22 (+189984)
chr4:185208856-185209441	ENPP6 (-70035), IRF2 (+186577)
chr4:185250414-185251008	ENPP6 (-111597), IRF2 (+145015)
chr4:185252364-185253184	ENPP6 (-113660), IRF2 (+142952)
chr4:185305054-185305578	ENPP6 (-166202), IRF2 (+90410)
chr4:185667487-185668044	MLF1IP (-12480), ACSL1 (+79449)
chr4:185814104-185814482	HELT (-125790), ACSL1 (-67078)
chr4:185815336-185815391	HELT (-124719), ACSL1 (-68149)
chr4:185819825-185820390	HELT (-119975), ACSL1 (-72893)
chr4:186190436-186190871	SNX25 (+59370), LRP2BP (+109498)
chr4:186429394-186429749	CCDC110 (-36659), PDLIM3 (+27140)
chr4:188156675-188157221	ZFP42 (-759977), FAT1 (-511961)
chr4:188157440-188158465	ZFP42 (-758972), FAT1 (-512966)
chr4:188275665-188276505	ZFP42 (-640840), FAT1 (-631098)
chr4:188421081-188421605	FAT1 (-776356), ZFP42 (-495582)
chr5:302225-303018	AHRR (-1670)
chr5:2266746-2267196	IRX4 (-384091), IRX2 (+484798)
chr5:2779542-2779997	IRX1 (-816398), C5orf38 (+27508)
chr5:2802478-2803515	IRX1 (-793171), C5orf38 (+50735)
chr5:9654940-9655464	TAS2R1 (-24739), FAM173B (+594812)
chr5:10307630-10308071	CMBL (+317)
chr5:14864098-14865075	ANKH (+7300), TRIO (+720758)
chr5:16508938-16509834	ZNF622 (-43492), FAM134B (+107781)
chr5:16744402-16745263	FAM134B (-127666), MYO10 (+191552)
chr5:16749617-16750233	FAM134B (-132758), MYO10 (+186460)
chr5:16787258-16787830	FAM134B (-170377), MYO10 (+148841)
chr5:17213051-17213577	BASP1 (-4436)
chr5:25448143-25449241	CDH10 (-803607)
chr5:28472463-28472856	NONE
chr5:28473474-28473892	NONE
chr5:28504975-28505874	NONE
chr5:28524011-28524515	NONE
chr5:32094062-32094684	GOLPH3 (+80052), PDZD2 (+295377)
chr5:32233487-32234380	GOLPH3 (-59509), MTMR12 (+79180)
chr5:32331118-32332029	MTMR12 (-18460), ZFR (+113270)
chr5:32710392-32710937	NPR3 (-773)
chr5:35201120-35201919	AGXT2 (-153280), PRLR (+29303)
chr5:35201935-35202745	AGXT2 (-154100), PRLR (+28483)
chr5:35205251-35206241	AGXT2 (-157506), PRLR (+25077)
chr5:35210137-35210755	AGXT2 (-162206), PRLR (+20377)
chr5:35213650-35214813	AGXT2 (-165992), PRLR (+16591)
chr5:35304757-35306153	SPEF2 (-312534), PRLR (-74632)
chr5:35350899-35351605	SPEF2 (-266737), PRLR (-120429)
chr5:35442983-35443595	PRLR (-212466), SPEF2 (-174700)
chr5:35468783-35469342	PRLR (-238240), SPEF2 (-148926)
chr5:35476585-35477999	PRLR (-246469), SPEF2 (-140697)
chr5:36041013-36041700	UGT3A1 (-49822), UGT3A2 (+25666)
chr5:36281627-36282073	NADKD1 (-39950), RANBP3L (+20161)
chr5:36285766-36286373	NADKD1 (-44170), RANBP3L (+15941)
chr5:36288050-36288448	NADKD1 (-46349), RANBP3L (+13762)
chr5:36731809-36732769	NIPBL (-144572), SLC1A3 (+125832)
chr5:37549401-37550417	NUP155 (-178712), GDNF (+286020)
chr5:37569427-37569951	NUP155 (-198492), GDNF (+266240)
chr5:39100962-39101456	RICTOR (-26708), FYB (+169550)
chr5:39712641-39713565	PTGER4 (-966929), DAB2 (-287768)
chr5:39716348-39717384	PTGER4 (-963166), DAB2 (-291531)
chr5:39836445-39837068	PTGER4 (-843275), DAB2 (-411422)
chr5:40254414-40254856	DAB2 (-829300), PTGER4 (-425397)
chr5:40429380-40430130	PTGER4 (-250277)
chr5:40477787-40478568	PTGER4 (-201854)
chr5:40552156-40552986	PTGER4 (-127461)
chr5:40774924-40776463	TTC33 (-19622), PRKAA1 (+22603)
chr5:42603484-42604056	GHR (+179893), SEPP1 (+208254)
chr5:42604094-42604824	GHR (+180582), SEPP1 (+207565)
chr5:43058260-43058640	ZNF131 (-63192), C5orf39 (-18003)
chr5:43432205-43433157	CCL28 (-20193), C5orf28 (+51311)
chr5:44002641-44002783	FGF10 (+386072), NNT (+399483)
chr5:53734747-53735325	ARL15 (-128633), HSPB3 (-16395)
chr5:53829636-53830037	SNX18 (+16244), ESM1 (+451577)
chr5:53880500-53880955	SNX18 (+67135), ESM1 (+400686)
chr5:53951900-53952491	SNX18 (+138603), ESM1 (+329218)
chr5:54117598-54118413	ESM1 (+163408), SNX18 (+304413)
chr5:54483965-54485519	GPX8 (+28758), IDAS (+38401)
chr5:54896981-54897522	PPAP2A (-66379), SLC38A9 (+111302)
chr5:55325134-55326428	MAP3K1 (-785119), IL6ST (-34960)
chr5:55346600-55347221	MAP3K1 (-763989), IL6ST (-56090)
chr5:55653282-55653779	MAP3K1 (-457369), IL6ST (-362710)
chr5:55683958-55685088	MAP3K1 (-426377), IL6ST (-393702)
chr5:55717379-55718547	IL6ST (-427142), MAP3K1 (-392937)
chr5:55724342-55725513	IL6ST (-434107), MAP3K1 (-385972)
chr5:55749279-55750524	IL6ST (-459081), MAP3K1 (-360998)
chr5:55750665-55751198	IL6ST (-460111), MAP3K1 (-359968)
chr5:55755763-55757118	IL6ST (-465620), MAP3K1 (-354459)
chr5:55936765-55937466	IL6ST (-646295), MAP3K1 (-173784)
chr5:55964623-55965648	IL6ST (-674315), MAP3K1 (-145764)
chr5:56052770-56053328	IL6ST (-762228), MAP3K1 (-57851)
chr5:56731366-56732007	ACTBL2 (+46949), GPBP1 (+221786)
chr5:57158094-57158944	ACTBL2 (-379883), PLK2 (+597447)
chr5:57365398-57366240	ACTBL2 (-587183), PLK2 (+390147)
chr5:57389701-57390410	ACTBL2 (-611420), PLK2 (+365910)
chr5:57391063-57391738	ACTBL2 (-612765), PLK2 (+364565)
chr5:57422773-57423225	ACTBL2 (-644363), PLK2 (+332967)
chr5:57477624-57478322	ACTBL2 (-699337), PLK2 (+277993)
chr5:57479127-57479973	ACTBL2 (-700914), PLK2 (+276416)
chr5:57483150-57484552	ACTBL2 (-705215), PLK2 (+272115)
chr5:58844619-58845163	PDE4D (+344730), RAB3C (+965952)
chr5:59664030-59664420	PDE4D (-474604), DEPDC1B (+331768)
chr5:60470893-60471057	ZSWIM6 (-157125), C5orf43 (-12673)
chr5:60576518-60577276	C5orf43 (-118595), ZSWIM6 (-51203)
chr5:62521988-62522457	LRRC70 (+647661), HTR1A (+735323)
chr5:66037071-66037673	MAST4 (+145196), CD180 (+455245)
chr5:66450617-66451111	CD180 (+41753), MAST4 (+558688)
chr5:66510698-66512394	CD180 (-18929)
chr5:66530031-66532165	PIK3R1 (-980486), CD180 (-38481)
chr5:67111451-67112224	CD180 (-619221), PIK3R1 (-399746)
chr5:67231887-67232432	CD180 (-739543), PIK3R1 (-279424)
chr5:67730951-67731245	SLC30A5 (-658678), PIK3R1 (+219514)
chr5:67830071-67830699	SLC30A5 (-559391), PIK3R1 (+318801)
chr5:67831219-67831656	SLC30A5 (-558338), PIK3R1 (+319854)
chr5:67841350-67841897	SLC30A5 (-548152), PIK3R1 (+330040)
chr5:67841922-67842438	SLC30A5 (-547596), PIK3R1 (+330596)
chr5:70927016-70927540	CARTPT (-87712), MCCC2 (+44163)
chr5:70927739-70928564	CARTPT (-86838), MCCC2 (+45037)
chr5:71044318-71044810	MAP1B (-358554), CARTPT (+29574)
chr5:71187724-71188268	MAP1B (-215122), CARTPT (+173006)
chr5:73536759-73537298	ENC1 (+400220), RGNEF (+615046)
chr5:74342183-74342775	HMGCR (-290514), GCNT4 (-15755)
chr5:76467928-76469407	ZBED3 (-85638), PDE8B (-38038)
chr5:79250472-79251012	MTX3 (+36346), CMYA5 (+265083)
chr5:79251857-79252460	MTX3 (+34929), CMYA5 (+266500)
chr5:79766983-79767265	ZFYVE16 (+63286), ANKRD34B (+99180)
chr5:82674475-82674966	VCAN (-92772), XRCC4 (+301404)
chr5:82682840-82683469	VCAN (-84338), XRCC4 (+309838)
chr5:89465667-89466053	CETN3 (+239743)
chr5:89517695-89518206	CETN3 (+187652)
chr5:89518260-89518545	CETN3 (+187200)
chr5:91441972-91442098	ARRDC3 (-762886)
chr5:91977145-91977461	NR2F1 (-941740)
chr5:92375493-92376120	NR2F1 (-543236)
chr5:94248172-94248805	ANKRD32 (+294098), MCTP1 (+371790)
chr5:94982035-94982514	RFESD (-206)
chr5:95064284-95064287	RHOBTB3 (-2564)
chr5:96269733-96270751	LNPEP (-23914), ERAP2 (+58598)
chr5:99982958-99984189	FAM174A (+112450), ST8SIA4 (+255413)
chr5:102744944-102745388	NUDT12 (+153324), PPIP5K2 (+280156)
chr5:102779944-102780581	NUDT12 (+118227), PPIP5K2 (+315253)
chr5:102781274-102781818	NUDT12 (+116944), PPIP5K2 (+316536)
chr5:105218642-105219218	NONE
chr5:105286171-105287247	NONE
chr5:105352819-105353403	NONE
chr5:106553196-106553838	EFNA5 (+453079)
chr5:106761505-106762017	EFNA5 (+244835)
chr5:106891307-106891808	EFNA5 (+115038)
chr5:106892478-106893560	EFNA5 (+113577)
chr5:106897538-106898062	EFNA5 (+108796)
chr5:106907254-106907803	EFNA5 (+99067)
chr5:108049821-108050156	FER (-33534)
chr5:112304433-112304955	REEP5 (-46663), DCP2 (-7713)
chr5:114765117-114765727	PGGT1B (-166853), FEM1C (+115169)
chr5:116194381-116195061	SEMA6A (-284170)
chr5:116791307-116791721	SEMA6A (-880963)
chr1:207015153-207015749	IL20 (-23703), IL19 (+43236)
chr1:207016776-207017670	IL20 (-21931), IL19 (+45008)
chr1:207082908-207083323	FAIM3 (+12262), IL24 (+12328)
chr1:207471879-207472763	CD55 (-22496), C4BPA (+194714)
chr1:207924747-207924759	CD46 (-630)
chr1:207924926-207925477	CD46 (-181)
chr1:208242348-208243013	CD34 (-157998), PLXNA2 (+174984)
chr1:209699434-209700030	CAMK1G (-57313)
chr1:209719326-209720382	CAMK1G (-37191)
chr1:211089180-211090300	KCNH1 (+217717), HHAT (+588144)
chr1:211186559-211187338	KCNH1 (+120508), HHAT (+685353)
chr1:211190444-211191331	KCNH1 (+116569), HHAT (+689292)
chr1:211194542-211195198	KCNH1 (+112587), HHAT (+693274)
chr1:211241923-211242967	KCNH1 (+65012), HHAT (+740849)
chr1:211256391-211256823	KCNH1 (+50850), HHAT (+755011)
chr1:211286740-211288451	KCNH1 (+19861), HHAT (+786000)
chr1:211715077-211715787	RD3 (-49173), SLC30A1 (+36667)
chr1:214389926-214390654	SMYD2 (-64275), PROX1 (+228430)
chr1:214612758-214613426	PTPN14 (+111932), SMYD2 (+158527)
chr1:214809374-214809981	KCNK2 (-446882), CENPF (+33146)
chr1:214810283-214811511	KCNK2 (-445663), CENPF (+34365)
chr1:215288301-215288455	KCTD3 (-452357), KCNK2 (+31818)
chr1:215319219-215320648	KCTD3 (-420801), KCNK2 (+63374)
chr1:215646567-215646653	KCTD3 (-94125), KCNK2 (+390050)
chr1:215646757-215647966	KCTD3 (-93373), KCNK2 (+390802)
chr1:215648050-215650267	KCTD3 (-91576), KCNK2 (+392599)
chr1:215713147-215714033	KCTD3 (-27145), KCNK2 (+457030)
chr1:215740159-215740817	KCTD3 (-247)
chr1:217978916-217979944	RRP15 (-479199), SPATA17 (+174735)
chr1:218819496-218820116	LYPLAL1 (-527386), TGFB2 (+301130)
chr1:219477781-219478416	LYPLAL1 (+130907), SLC30A10 (+623894)
chr1:221785436-221786242	DUSP10 (+129677), HLX (+733096)
chr1:224390880-224391776	DEGS1 (+20418), NVL (+126563)
chr1:224626196-224627205	WDR26 (-4700)
chr1:224637955-224639190	CNIH3 (-165606), WDR26 (-16572)
chr1:224641816-224642875	CNIH3 (-161833), WDR26 (-20345)
chr1:225641741-225642286	LBR (-26199), ENAH (+198831)
chr1:225953949-225954479	ENAH (-113369), SRP9 (-11301)
chr1:226826225-226826722	C1orf95 (+89973), ITPKB (+100402)
chr1:226885542-226886084	ITPKB (+41063), C1orf95 (+149312)
chr1:226886704-226887312	ITPKB (+39868), C1orf95 (+150507)
chr1:226889996-226891069	ITPKB (+36343), C1orf95 (+154032)
chr1:228081504-228082123	WNT9A (+53862), PRSS38 (+78396)
chr1:228083533-228084009	WNT9A (+51905), PRSS38 (+80353)
chr1:228608639-228609274	TRIM17 (-4374)
chr1:228619427-228620034	HIST3H3 (-6705), HIST3H2A (+25829)
chr1:229356783-229357742	RAB4A (-49616), RHOU (+486439)
chr1:230344145-230344729	GALNT2 (+141481), PGBD5 (+168954)
chr1:230818798-230819128	AGT (+31373), COG2 (+40761)
chr1:230893816-230894308	CAPN9 (+10932), TTC13 (+220556)
chr1:230895973-230896434	CAPN9 (+13074), TTC13 (+218414)
chr1:231518872-231519343	EGLN1 (+41682), C1orf124 (+45426)
chr1:233195108-233195724	NTPCR (+109046), PCNXL2 (+236043)
chr1:233838569-233839145	SLC35F3 (-201822), KCNK1 (+89107)
chr1:233840674-233841477	SLC35F3 (-199603), KCNK1 (+91326)
chr1:234700049-234700910	TARBP1 (-85631), IRF2BP2 (+44791)
chr1:234737019-234737770	TARBP1 (-122546), IRF2BP2 (+7876)
chr1:234739509-234740037	TARBP1 (-124924), IRF2BP2 (+5498)
chr1:234740552-234741164	TARBP1 (-126009), IRF2BP2 (+4413)
chr1:234748215-234748911	IRF2BP2 (-3292)
chr1:234793747-234794454	IRF2BP2 (-48830), TOMM20 (+498155)
chr1:234853365-234853870	IRF2BP2 (-108347), TOMM20 (+438638)
chr1:234859226-234861239	IRF2BP2 (-114962), TOMM20 (+432023)
chr1:235009896-235010836	IRF2BP2 (-265095), TOMM20 (+281890)
chr1:235010910-235012856	IRF2BP2 (-266612), TOMM20 (+280373)
chr1:235053832-235054352	IRF2BP2 (-308821), TOMM20 (+238164)
chr1:235123064-235123746	IRF2BP2 (-378134), TOMM20 (+168851)
chr1:240599040-240600034	GREM2 (+175925), FMN2 (+344352)
chr1:240638714-240638960	GREM2 (+136625), FMN2 (+383652)
chr1:240639010-240639760	GREM2 (+136077), FMN2 (+384200)
chr1:240767971-240768481	GREM2 (+7236), FMN2 (+513041)
chr1:240850945-240851744	GREM2 (-75883), RGS7 (+669133)
chr1:241697070-241697489	KMO (+1846), CHML (+101952)
chr1:241752706-241753329	CHML (+46214), KMO (+57584)
chr1:241754606-241755593	CHML (+44132), KMO (+59666)
chr1:241913148-241913718	OPN3 (-109732), EXO1 (-98060)
chr1:244490814-244491335	ADSS (+124361), ZNF238 (+276514)
chr1:245118693-245119369	HNRNPU (-91204), EFCAB2 (-14140)
chr1:246642471-246642918	SMYD3 (+27949)
chr1:246771930-246772647	SCCPDH (-115089), CNST (+42650)
chr10:141565-142125	ZMYND11 (-84089), TUBB8 (-46667)
chr10:193489-194405	TUBB8 (-98769), ZMYND11 (-31987)
chr10:198750-200042	TUBB8 (-104218), ZMYND11 (-26538)
chr10:500722-501253	DIP2C (+234620), ZMYND11 (+275054)
chr10:592751-593296	DIP2C (+142584), ZMYND11 (+367090)
chr10:992954-993618	LARP4B (-61584), GTPBP4 (-41063)
chr10:3510178-3511691	PITRM1 (-295902), KLF6 (+316538)
chr10:3790110-3790617	PITRM1 (-575331), KLF6 (+37109)
chr10:3894336-3895146	AKR1E2 (-973661), KLF6 (-67268)
chr10:3978072-3978713	AKR1E2 (-890009), KLF6 (-150920)
chr10:4100797-4101403	AKR1E2 (-767302), KLF6 (-273627)
chr10:4225623-4226358	AKR1E2 (-642411), KLF6 (-398518)
chr10:4321485-4323877	AKR1E2 (-545721), KLF6 (-495208)
chr10:4680147-4680801	KLF6 (-853001), AKR1E2 (-187928)
chr10:4703908-4704519	KLF6 (-876741), AKR1E2 (-164188)
chr10:4705092-4705797	KLF6 (-877972), AKR1E2 (-162957)
chr10:6329303-6329714	PFKFB3 (+84669), PRKCQ (+292745)
chr10:6338420-6340599	PFKFB3 (+94670), PRKCQ (+282744)
chr10:6403738-6404297	PFKFB3 (+159178), PRKCQ (+218236)
chr10:6404415-6406057	PFKFB3 (+160396), PRKCQ (+217018)
chr10:6406707-6408059	PFKFB3 (+162543), PRKCQ (+214871)
chr10:6435932-6437170	PRKCQ (+185703), PFKFB3 (+191711)
chr10:6438093-6439407	PRKCQ (+183504), PFKFB3 (+193910)
chr10:6440881-6441874	PRKCQ (+180876), PFKFB3 (+196538)
chr10:6442036-6442654	PRKCQ (+179909), PFKFB3 (+197505)
chr10:6443343-6444064	PRKCQ (+178550), PFKFB3 (+198864)
chr10:7275181-7276168	PRKCQ (-653421), SFMBT2 (+177773)
chr10:7738414-7738959	ITIH5 (-29726), ITIH2 (-6549)
chr10:8126512-8127523	GATA3 (+30351)
chr10:8170051-8171135	GATA3 (+73926)
chr10:8449335-8450208	GATA3 (+353105)
chr10:8585746-8586933	GATA3 (+489673)
chr10:8636602-8637293	GATA3 (+540281)
chr10:8786585-8786871	GATA3 (+690061)
chr10:8794045-8795057	GATA3 (+697884)
chr10:8952087-8953900	GATA3 (+856327)
chr10:8993132-8994176	GATA3 (+896987)
chr10:9076049-9076859	GATA3 (+979787)
chr10:9078509-9079239	GATA3 (+982207)
chr10:9079586-9080897	GATA3 (+983575)
chr10:9093293-9094027	GATA3 (+996993)
chr10:9229760-9231295	NONE
chr10:11704651-11705120	USP6NL (-130612), ECHDC3 (-79470)
chr10:11757720-11758420	USP6NL (-183796), ECHDC3 (-26286)
chr10:12192025-12192756	CDC123 (-45570), SEC61A2 (+20751)
chr10:12644983-12645667	CAMK1D (+253742), CCDC3 (+398379)
chr10:12647527-12648154	CAMK1D (+256258), CCDC3 (+395863)
chr10:14613793-14614603	FRMD4A (-241332), CDNF (+265785)
chr10:14695085-14695658	FRMD4A (-322506), CDNF (+184611)
chr10:14695677-14696357	FRMD4A (-323151), CDNF (+183966)
chr10:14728975-14729743	FRMD4A (-356493), CDNF (+150624)
chr10:15352159-15352688	NMT2 (-141729), FAM171A1 (+60634)
chr10:17487094-17488460	ST8SIA6 (+8477), VIM (+217519)
chr10:19789663-19790538	PLXDC2 (-315271), C10orf112 (+12078)
chr10:22159592-22160110	DNAJC1 (+132799), MLLT10 (+336277)
chr10:23370044-23370784	MSRB2 (-14013), ARMC3 (+153460)
chr10:24633173-24633648	KIAA1217 (+135691), ARHGAP21 (+379186)
chr10:24831177-24832085	ARHGAP21 (+180966), KIAA1217 (+333911)
chr10:24907276-24907724	ARHGAP21 (+105097), KIAA1217 (+409780)
chr10:25672754-25673324	MYO3A (-549963), GPR158 (+208749)
chr10:25673418-25673850	MYO3A (-549368), GPR158 (+209344)
chr10:27276367-27277730	ABI1 (-127033), ANKRD26 (+112378)
chr10:27531942-27532349	ACBD5 (-2338)
chr10:27532583-27532800	ACBD5 (-2884)
chr10:27826056-27826490	RAB18 (+33024), MKX (+208505)
chr10:28572938-28573557	MPP7 (-2181)
chr10:28784997-28786235	MPP7 (-214549), WAC (-36805)
chr10:29172655-29173729	LYZL1 (-404798), BAMBI (+206768)
chr10:29311436-29311914	LYZL1 (-266315), BAMBI (+345251)
chr10:29393606-29394880	LYZL1 (-183747), BAMBI (+427819)
chr5:117135906-117136545	NONE
chr5:117345237-117346363	NONE
chr5:117583214-117583915	NONE
chr5:117691443-117691869	TNFAIP8 (-999940)
chr5:122188221-122188934	SNX24 (+7418), PPIC (+183847)
chr5:122490912-122491729	PRDM6 (+66480), CEP120 (+267965)
chr5:122774568-122775256	CSNK1G3 (-72881), CEP120 (-15626)
chr5:123998215-123998904	ZNF608 (+82305)
chr5:124241986-124242791	ZNF608 (-161524)
chr5:124814241-124814927	ZNF608 (-733719)
chr5:124817157-124818135	ZNF608 (-736781)
chr5:124820566-124821520	ZNF608 (-740178)
chr5:124821618-124821782	ZNF608 (-740835)
chr5:126721559-126722047	PRRC1 (-131506), MEGF10 (+95347)
chr5:128464799-128465366	ADAMTS19 (-331020), ISOC1 (+34641)
chr5:129862410-129862774	CHSY3 (+622069), HINT1 (+638442)
chr5:130832282-130832735	RAPGEF6 (+138420), CDC42SE2 (+232807)
chr5:131007868-131008485	RAPGEF6 (-37248), ACSL6 (+339178)
chr5:131601992-131602387	SLC22A4 (-27955), PDLIM4 (+8839)
chr5:131706728-131707322	SLC22A5 (+1624), IRF1 (+119440)
chr5:132143860-132144907	SEPT8 (-31317), SHROOM1 (+17618)
chr5:132173471-132173984	SHROOM1 (-11726), GDF9 (+26749)
chr5:132384633-132385915	HSPA4 (-2388)
chr5:133329172-133329832	C5orf15 (-25096), VDAC1 (+11322)
chr5:133372704-133373437	TCF7 (-77331), VDAC1 (-32247)
chr5:133681675-133682343	SKP1 (-169285), CDKL3 (+20756)
chr5:133801465-133802845	PHF15 (-59643), UBE2B (+95285)
chr5:134544163-134544584	PITX1 (-174410), H2AFY (+190554)
chr5:136059158-136060517	TRPC7 (-358674), SPOCK1 (+775180)
chr5:136108360-136109399	TRPC7 (-407716), SPOCK1 (+726138)
chr5:137150852-137151647	MYOT (-52295), NPY6R (+14368)
chr5:137944749-137945606	CTNNA1 (-143929), HSPA9 (-33860)
chr5:138060769-138061248	HSPA9 (-149691), CTNNA1 (-28098)
chr5:138400291-138400640	LRRTM2 (-189409), SIL1 (+133599)
chr5:138482436-138483146	LRRTM2 (-271734), SIL1 (+51274)
chr5:138483216-138483867	LRRTM2 (-272485), SIL1 (+50523)
chr5:138483921-138484525	LRRTM2 (-273166), SIL1 (+49842)
chr5:139040291-139040362	PSD2 (-135079), CXXC5 (+12026)
chr5:139040435-139040911	PSD2 (-134733), CXXC5 (+12372)
chr5:139057014-139057387	PSD2 (-118205), CXXC5 (+28900)
chr5:139088397-139088786	PSD2 (-86814), CXXC5 (+60291)
chr5:139088828-139089214	PSD2 (-86385), CXXC5 (+60720)
chr5:141245433-141245929	ARAP3 (-183881), PCDH1 (+12263)
chr5:141349815-141350331	RNF14 (+1622), GNPDA1 (+42547)
chr5:141600656-141601358	SPRY4 (+103613), NDFIP1 (+112683)
chr5:141660494-141661149	SPRY4 (+43798), NDFIP1 (+172498)
chr5:142100094-142100539	ARHGAP26 (-49975), FGF1 (-34664)
chr5:142562298-142563190	NR3C1 (+221301), ARHGAP26 (+412452)
chr5:142577390-142577893	NR3C1 (+206403), ARHGAP26 (+427350)
chr5:142940646-142941200	NR3C1 (-156878), YIPF5 (+609355)
chr5:142974346-142975338	NR3C1 (-190797), YIPF5 (+575436)
chr5:143077993-143078470	NR3C1 (-294187), YIPF5 (+472046)
chr5:145325177-145325942	SH3RF2 (+9434), LARS (+236734)
chr5:145361333-145362518	SH3RF2 (+45800), LARS (+200368)
chr5:145747750-145748096	TCERG1 (-78950), POU4F3 (+29336)
chr5:147451631-147452064	SPINK14 (-97448), SPINK5 (+8313)
chr5:147524730-147526009	SPINK14 (-23926), SPINK5 (+81835)
chr5:147641190-147641361	SPINK13 (-7006), SPINK6 (+58919)
chr5:147774101-147774412	FBXO38 (+10711), HTR4 (+242367)
chr5:147777815-147778558	FBXO38 (+14641), HTR4 (+238437)
chr5:148508639-148509283	SH3TC2 (-66224), ABLIM3 (-12093)
chr5:148510344-148510992	SH3TC2 (-67931), ABLIM3 (-10386)
chr5:149140815-149141345	PPARGC1B (+31265), PDE6A (+183276)
chr5:149317531-149317617	PDE6A (+6782), PPARGC1B (+207759)
chr5:149317742-149318267	PDE6A (+6351), PPARGC1B (+208190)
chr5:149878202-149879409	RPS14 (-49487), NDST1 (-8868)
chr5:149880282-149881002	RPS14 (-51323), NDST1 (-7032)
chr5:149881680-149882317	RPS14 (-52680), NDST1 (-5675)
chr5:149889822-149890483	SYNPO (-90489), NDST1 (+2479)
chr5:149891581-149892430	SYNPO (-88636), NDST1 (+4332)
chr5:150451901-150452360	TNIP1 (+14616), GPX3 (+52132)
chr5:150458236-150458697	TNIP1 (+8280), GPX3 (+58468)
chr5:150701516-150702099	SLC36A3 (-18474), SLC36A2 (+25343)
chr5:151159285-151159774	G3BP1 (+8054), GLRA1 (+144867)
chr5:154222440-154222977	C5orf4 (+7504), LARP1 (+130247)
chr5:154224223-154224895	C5orf4 (+5654), LARP1 (+132097)
chr5:154447770-154449351	KIF4B (+55301)
chr5:154449724-154450819	KIF4B (+57012)
chr5:154470550-154471392	KIF4B (+77711)
chr5:154495841-154497009	KIF4B (+103165)
chr5:156763107-156763504	FNDC9 (+9423), CYFIP2 (+70215)
chr5:156812024-156812439	NIPAL4 (-74795), FNDC9 (-39503)
chr5:158613320-158613802	EBF1 (-86773), RNF145 (+21273)
chr5:158837268-158837919	ADRA1B (-506146), IL12B (-80113)
chr5:158945199-158946250	ADRA1B (-398015), IL12B (-188244)
chr5:163043273-163043728	MAT2B (+110916)
chr5:163928132-163928876	MAT2B (+995919)
chr5:163944682-163945954	NONE
chr5:167710028-167710595	WWC1 (-8753), ODZ2 (+998469)
chr5:167761774-167762295	RARS (-151428), WWC1 (+42970)
chr5:167778786-167779347	RARS (-134396), WWC1 (+60002)
chr5:167780123-167781102	RARS (-132850), WWC1 (+61548)
chr5:167791780-167793012	RARS (-121067), WWC1 (+73331)
chr5:168018837-168019610	PANK3 (-12610), SLIT3 (+708909)
chr5:171810203-171810662	UBTD2 (-99638), SH3PXD2B (+71094)
chr5:172115918-172116408	NEURL1B (+47887), DUSP1 (+82040)
chr5:172879860-172879901	STC2 (-123375), BOD1 (+163785)
chr5:172881274-172882613	STC2 (-125438), BOD1 (+161722)
chr5:172899043-172900686	STC2 (-143359), BOD1 (+143801)
chr5:172913197-172913681	STC2 (-156933), BOD1 (+130227)
chr5:172926244-172927041	STC2 (-170137), BOD1 (+117023)
chr5:172959917-172960846	STC2 (-203876), BOD1 (+83284)
chr5:172961881-172963576	STC2 (-206223), BOD1 (+80937)
chr5:172990046-172990727	STC2 (-233881), BOD1 (+53279)
chr5:172994372-172995129	STC2 (-238245), BOD1 (+48915)
chr5:173017584-173018909	STC2 (-261741), BOD1 (+25419)
chr5:173193285-173193936	BOD1 (-149945), CPEB4 (-121720)
chr5:173249425-173249927	BOD1 (-206010), CPEB4 (-65655)
chr5:173909428-173910039	MSX2 (-241841), HMP19 (+437010)
chr5:173910295-173910930	MSX2 (-240962), HMP19 (+437889)
chr5:174136253-174136725	MSX2 (-15086), HMP19 (+663765)
chr5:174204058-174204543	MSX2 (+52726), DRD1 (+666862)
chr5:174345181-174345644	MSX2 (+193838), DRD1 (+525750)
chr5:177423915-177424348	PROP1 (-889)
chr5:177507615-177508114	PROP1 (-84622), N4BP3 (-32691)
chr5:180005573-180006029	SCGB3A1 (+12686), CNOT6 (+84384)
chr5:180022098-180023322	SCGB3A1 (-4223)
chr6:699482-700311	FOXQ1 (-612778), EXOC2 (-6788)
chr6:1526022-1526406	FOXC1 (-84467), FOXF2 (+136145)
chr6:1577895-1578196	FOXC1 (-32635), FOXF2 (+187977)
chr6:1641281-1642038	FOXC1 (+30979), GMDS (+604208)
chr6:1832912-1833467	FOXC1 (+222509), GMDS (+412678)
chr6:2743912-2744391	GMDS (-498284), MYLK4 (+7002)
chr6:2804744-2805130	SERPINB1 (+37144), WRNIP1 (+39271)
chr6:2864065-2864467	SERPINB1 (-22185), SERPINB9 (+39279)
chr6:3664677-3665745	SLC22A23 (-208418), PXDC1 (+87035)
chr6:3669958-3670569	SLC22A23 (-213471), PXDC1 (+81982)
chr6:3710362-3711178	SLC22A23 (-253977), PXDC1 (+41476)
chr6:6725280-6725635	RREB1 (-382628), LY86 (+136524)
chr6:6758912-6759835	RREB1 (-348712), LY86 (+170440)
chr6:7062492-7063229	RREB1 (-45225), LY86 (+473927)
chr6:7198171-7198956	RREB1 (+90478), SSR1 (+114977)
chr6:7206360-7206924	RREB1 (+98556), SSR1 (+106899)
chr6:7418357-7418957	DSP (-123213), RIOK1 (+28595)
chr6:7464006-7464294	DSP (-77720), RIOK1 (+74088)
chr6:7561387-7562335	SNRNP48 (-28571), DSP (+19991)
chr6:8083241-8084235	EEF1E1 (+19090), PIP5K1P1 (+97403)
chr6:8463029-8463459	SLC35B3 (-27450)
chr6:10163308-10164335	OFCC1 (-224240), TFAP2A (+251648)
chr6:10193522-10193963	OFCC1 (-254161), TFAP2A (+221727)
chr6:10310816-10311449	OFCC1 (-371551), TFAP2A (+104337)
chr6:10315184-10315920	OFCC1 (-375970), TFAP2A (+99918)
chr6:10341899-10342405	OFCC1 (-402570), TFAP2A (+73318)
chr6:11207340-11207904	ERVFRD-1 (-95551), NEDD9 (+25293)
chr6:11288209-11288699	TMEM170B (-250057), NEDD9 (-55539)
chr6:11389940-11390771	NEDD9 (-157441), TMEM170B (-148155)
chr6:11586173-11586627	TMEM170B (+47889), C6orf105 (+192880)
chr6:12275263-12275946	EDN1 (-14924), HIVEP1 (+262881)
chr6:12283977-12284517	EDN1 (-6282), HIVEP1 (+271523)
chr6:12288691-12289057	EDN1 (-1655)
chr6:12289086-12289709	EDN1 (-1131)
chr6:12312912-12315450	PHACTR1 (-402856), EDN1 (+23652)
chr6:12324333-12325049	PHACTR1 (-392346), EDN1 (+34162)
chr6:12331384-12332836	PHACTR1 (-384927), EDN1 (+41581)
chr6:12343513-12344609	PHACTR1 (-372976), EDN1 (+53532)
chr6:12411030-12411805	PHACTR1 (-305619), EDN1 (+120889)
chr10:29395033-29395629	LYZL1 (-182659), BAMBI (+428907)
chr10:29396655-29397343	LYZL1 (-180991), BAMBI (+430575)
chr10:29568530-29568972	LYZL1 (-9239), BAMBI (+602327)
chr10:29592219-29592948	LYZL1 (+14594), SVIL (+331317)
chr10:29911410-29911790	SVIL (+12301), LYZL1 (+333610)
chr10:30080628-30081335	SVIL (-157081), MTPAP (+557285)
chr10:30100929-30101582	SVIL (-177355), MTPAP (+537011)
chr10:30128616-30129227	SVIL (-205021), MTPAP (+509345)
chr10:30129359-30129702	SVIL (-205630), MTPAP (+508736)
chr10:32649068-32649581	EPC1 (-13212), ITGB1 (+597968)
chr10:34506353-34506994	NRP1 (-882841), PARD3 (+597579)
chr10:35781199-35781916	GJD4 (-112780), CCNY (+155756)
chr10:35782183-35782715	GJD4 (-111889), CCNY (+156647)
chr10:44273502-44274584	ZNF32 (-129717), HNRNPA3P1 (+11822)
chr10:44349467-44350104	HNRNPA3P1 (-63921), CXCL12 (+530759)
chr10:44668590-44669760	HNRNPA3P1 (-383310), CXCL12 (+211370)
chr10:44740322-44740889	HNRNPA3P1 (-454741), CXCL12 (+139939)
chr10:44749336-44749846	HNRNPA3P1 (-463726), CXCL12 (+130954)
chr10:46193087-46193976	FAM21C (-29116), ZFAND4 (-25281)
chr10:46323059-46323857	AGAP4 (+19463), FAM21C (+100810)
chr10:46952249-46953357	PTPN20A (-332745), SYT15 (+17798)
chr10:47727397-47727851	AGAP9 (-513998), ANXA8L2 (-19296)
chr10:48234798-48235467	ANXA8L1 (-20092), FAM21B (+341110)
chr10:49220150-49220690	AGAP8 (-313499), FRMPD2 (+262521)
chr10:49495715-49496499	MAPK8 (-113548), FRMPD2 (-13166)
chr10:51466401-51466913	AGAP7 (+19670), TIMM23 (+95262)
chr10:51767461-51768224	FAM21A (-59841), AGAP6 (+19765)
chr10:53340884-53341344	CSTF2T (+118241), PRKG1 (+590203)
chr10:54069730-54070223	DKK1 (-4064)
chr10:54108803-54109272	DKK1 (+34997), MBL2 (+422422)
chr10:54113717-54114281	DKK1 (+39958), MBL2 (+417461)
chr10:54115540-54116056	DKK1 (+41757), MBL2 (+415662)
chr10:54168887-54169449	DKK1 (+95127), MBL2 (+362292)
chr10:54203013-54204048	DKK1 (+129490), MBL2 (+327929)
chr10:57991039-57991543	ZWINT (+129743), MTRNR2L5 (+632541)
chr10:60172309-60172875	BICC1 (-100312), TFAM (+27416)
chr10:60197821-60197871	BICC1 (-75058), TFAM (+52670)
chr10:60197881-60198602	BICC1 (-74662), TFAM (+53066)
chr10:61096889-61097437	PHYHIPL (+160815), SLC16A9 (+372486)
chr10:61639031-61639521	SLC16A9 (-169627), CCDC6 (+27138)
chr10:61724934-61725669	CCDC6 (-58888), ANK3 (+424332)
chr10:61755411-61755915	CCDC6 (-89249), ANK3 (+393971)
chr10:61791126-61791889	CCDC6 (-125094), ANK3 (+358126)
chr10:61792514-61792969	CCDC6 (-126328), ANK3 (+356892)
chr10:61965409-61965901	CCDC6 (-299241), ANK3 (+183979)
chr10:62136146-62136677	CCDC6 (-469998), ANK3 (+13222)
chr10:62702232-62703259	RHOBTB1 (+1287), CDK1 (+164534)
chr10:62835146-62836081	RHOBTB1 (-131581), TMEM26 (+377594)
chr10:62870365-62871329	RHOBTB1 (-166814), TMEM26 (+342361)
chr10:63683040-63683553	ARID5B (+22284), RTKN2 (+345169)
chr10:63741173-63741710	ARID5B (+80429), RTKN2 (+287024)
chr10:63842034-63842586	ARID5B (+181297), RTKN2 (+186156)
chr10:63866788-63867508	RTKN2 (+161318), ARID5B (+206135)
chr10:65395112-65395787	REEP3 (+114327)
chr10:68017477-68018167	LRRTM3 (-667970)
chr10:68874529-68875099	LRRTM3 (+189022), CTNNA3 (+581135)
chr10:70275898-70276633	DNA2 (-44387), SLC25A16 (+11014)
chr10:71092498-71093457	HK1 (+63222), TACR2 (+83696)
chr10:71120373-71120931	TACR2 (+56022), HK1 (+90896)
chr10:71145673-71146169	TACR2 (+30753), HK1 (+116165)
chr10:71181472-71182170	TSPAN15 (-29405), TACR2 (-5147)
chr10:74091268-74091678	DNAJB12 (+23434), DDIT4 (+57796)
chr10:75436388-75436962	SYNPO2L (-20843), AGAP5 (+20879)
chr10:75949567-75950187	KAT6B (-636502), ADK (+38934)
chr10:76502955-76503638	KAT6B (-83082), ADK (+592354)
chr10:77004187-77006008	COMTD1 (-9328), ZNF503 (+156415)
chr10:78343315-78344471	NONE
chr10:79064883-79065976	KCNMA1 (+332147)
chr10:79130487-79131169	KCNMA1 (+266749)
chr10:79131390-79133033	KCNMA1 (+265365)
chr10:79169661-79170438	KCNMA1 (+227527)
chr10:79173371-79174180	KCNMA1 (+223801)
chr10:79174858-79175533	KCNMA1 (+222381)
chr10:79176035-79177695	KCNMA1 (+220712)
chr10:79190715-79191616	KCNMA1 (+206411)
chr10:79221251-79221788	KCNMA1 (+176057)
chr10:79239860-79239966	KCNMA1 (+157664)
chr10:79257973-79258436	KCNMA1 (+139372)
chr10:79258568-79259059	KCNMA1 (+138763)
chr10:79266897-79267601	KCNMA1 (+130328)
chr10:79400790-79401302	KCNMA1 (-3469)
chr10:79616685-79617477	KCNMA1 (-219504), DLG5 (+69267)
chr10:79619156-79619754	KCNMA1 (-221878), DLG5 (+66893)
chr10:79625140-79626123	KCNMA1 (-228055), DLG5 (+60716)
chr10:79629490-79630334	KCNMA1 (-232335), DLG5 (+56436)
chr10:79631784-79632583	KCNMA1 (-234607), DLG5 (+54164)
chr10:79632969-79633539	KCNMA1 (-235677), DLG5 (+53094)
chr10:79647284-79648094	KCNMA1 (-250112), DLG5 (+38659)
chr10:79648973-79649683	KCNMA1 (-251751), DLG5 (+37020)
chr10:79679429-79679984	KCNMA1 (-282130), DLG5 (+6641)
chr10:80349296-80349819	ZMIZ1 (-479234), RPS24 (+556040)
chr10:80502443-80502829	ZMIZ1 (-326156), RPS24 (+709118)
chr10:80853383-80854269	PPIF (-253394), ZMIZ1 (+25034)
chr10:80886642-80887308	PPIF (-220245), ZMIZ1 (+58183)
chr10:80887994-80889147	PPIF (-218649), ZMIZ1 (+59779)
chr10:80916436-80918955	PPIF (-189524), ZMIZ1 (+88904)
chr10:81101807-81102930	PPIF (-4851)
chr10:81486403-81486896	SFTPA1 (+115955), SFTPD (+222211)
chr10:81965500-81965925	ANXA11 (-385)
chr10:82201599-82201939	TSPAN14 (-12269), C10orf58 (+28194)
chr10:82707027-82707485	NRG3 (-927814), TSPAN14 (+493218)
chr10:82723794-82724434	NRG3 (-910956), TSPAN14 (+510076)
chr10:82725599-82726952	NRG3 (-908794), TSPAN14 (+512238)
chr10:82727054-82727714	NRG3 (-907686), TSPAN14 (+513346)
chr10:82767403-82768126	NRG3 (-867305), TSPAN14 (+553727)
chr10:82800533-82801261	NRG3 (-834173), TSPAN14 (+586859)
chr10:83665406-83666049	NRG3 (+30658)
chr10:86121778-86122417	RGR (+117289)
chr10:86167200-86167631	RGR (+162607)
chr10:86870714-86871438	RGR (+866267)
chr10:88767021-88767930	AL157440 (-36905), GLUD1 (+87300)
chr10:88767999-88768636	AL157440 (-37747), GLUD1 (+86458)
chr10:88964156-88965000	MINPP1 (-299645), GLUD1 (-109802)
chr10:89008529-89009078	MINPP1 (-255419), GLUD1 (-154028)
chr10:89248401-89249028	GLUD1 (-393939), MINPP1 (-15508)
chr10:89348884-89349908	PAPSS2 (-70080), MINPP1 (+85173)
chr10:89407818-89408163	PAPSS2 (-11485), MINPP1 (+143768)
chr10:89912329-89913017	KLLN (-289479), RNLS (+430409)
chr10:90199503-90200826	KLLN (-576971), RNLS (+142917)
chr10:90283518-90284015	KLLN (-660573), RNLS (+59315)
chr10:90300839-90301815	KLLN (-678133), RNLS (+41755)
chr10:90399936-90400358	LIPF (-23999), LIPJ (+53628)
chr10:90611352-90611866	STAMBPL1 (-28417), LIPM (+49122)
chr10:90615732-90616117	STAMBPL1 (-24101), LIPM (+53438)
chr10:90632400-90633098	STAMBPL1 (-7277), LIPM (+70262)
chr10:93449754-93450658	TNKS2 (-107945), PPP1R3C (-57348)
chr10:93882649-93883369	CPEB3 (+167866), BTAF1 (+199273)
chr10:93884397-93885135	CPEB3 (+166109), BTAF1 (+201030)
chr10:94663087-94663397	CYP26C1 (-157779), EXOC6 (+55017)
chr10:95004207-95004860	CYP26A1 (+170887), MYOF (+237540)
chr10:95019198-95019256	CYP26A1 (+185580), MYOF (+222847)
chr10:95019478-95019952	CYP26A1 (+186068), MYOF (+222359)
chr10:95020602-95021355	CYP26A1 (+187332), MYOF (+221095)
chr10:95194459-95195640	MYOF (+47024), CYP26A1 (+361403)
chr10:95196710-95198167	MYOF (+44635), CYP26A1 (+363792)
chr10:95198349-95199131	MYOF (+43334), CYP26A1 (+365093)
chr10:95200199-95200806	MYOF (+41571), CYP26A1 (+366856)
chr10:95330588-95331342	O3FAR1 (+4543), RBP4 (+30028)
chr10:95764866-95765373	PLCE1 (+11374), NOC3L (+357563)
chr10:95795809-95796783	PLCE1 (+42550), NOC3L (+326387)
chr10:95882913-95883674	PLCE1 (+129548), NOC3L (+239389)
chr10:96175735-96176192	HELLS (-129610), TBC1D12 (+13778)
chr10:97233982-97234874	SORBS1 (-33491), ALDH18A1 (+182139)
chr10:98031155-98031801	BLNK (-145)
chr10:98392564-98393440	TM9SF3 (-46193), PIK3AP1 (+87277)
chr6:12415786-12417977	PHACTR1 (-300155), EDN1 (+126353)
chr6:12484569-12486038	PHACTR1 (-231733), EDN1 (+194775)
chr6:12844049-12845286	PHACTR1 (+127631), TBC1D7 (+484119)
chr6:12845294-12845447	PHACTR1 (+128334), TBC1D7 (+483416)
chr6:15089756-15090779	JARID2 (-156259), CD83 (+972403)
chr6:15221928-15222624	JARID2 (-24251)
chr6:15953376-15953616	DTNBP1 (-290207), MYLIP (-175821)
chr6:16406738-16407419	GMPR (+168268), ATXN1 (+354642)
chr6:17012626-17013459	RBM24 (-268766), ATXN1 (-251322)
chr6:17034895-17035938	ATXN1 (-273696), RBM24 (-246392)
chr6:17115962-17116429	ATXN1 (-354475), RBM24 (-165613)
chr6:17159361-17159947	ATXN1 (-397933), RBM24 (-122155)
chr6:17389278-17390221	CAP2 (-3986)
chr6:17390291-17390503	CAP2 (-3339)
chr6:18055725-18056642	KIF13A (-68330), NHLRC1 (+66667)
chr6:18386349-18387128	RNF144B (-842)
chr6:18424493-18424817	RNF144B (+37074)
chr6:18425373-18425879	RNF144B (+38045)
chr6:18457179-18457687	RNF144B (+69852)
chr6:18493543-18494605	RNF144B (+106493)
chr6:24550108-24550623	ALDH5A1 (+55169), KIAA0319 (+96017)
chr6:25284259-25284680	SCGN (-367959), LRRC16A (+4814)
chr6:26296155-26296550	BTN3A2 (-72053), HIST1H4H (-10626)
chr6:30719039-30719936	DDR1 (-136977), IER3 (-7161)
chr6:30719964-30720660	DDR1 (-136153), IER3 (-7985)
chr6:30766879-30767453	DDR1 (-89299), IER3 (-54839)
chr6:30790255-30790974	IER3 (-78288), DDR1 (-65850)
chr6:30850956-30851306	IER3 (-138804), DDR1 (-5334)
chr6:31170975-31171576	POU5F1 (-32825), HLA-C (+68637)
chr6:33698400-33698890	C6orf125 (-19141), IP6K3 (+16117)
chr6:33698892-33699437	C6orf125 (-19661), IP6K3 (+15597)
chr6:33699560-33700117	C6orf125 (-20335), IP6K3 (+14923)
chr6:33707770-33708403	C6orf125 (-28583), IP6K3 (+6675)
chr6:33796040-33796416	MLN (-24435), GRM4 (+305408)
chr6:33958560-33959020	MLN (-186997), GRM4 (+142846)
chr6:33959428-33959939	MLN (-187891), GRM4 (+141952)
chr6:33963496-33964026	MLN (-191968), GRM4 (+137875)
chr6:34504196-34504839	SPDEF (+19592), PACSIN1 (+21869)
chr6:34566435-34567064	SPDEF (-42640), C6orf106 (+97875)
chr6:35272097-35272457	PPARD (-38058), DEF6 (+6682)
chr6:35467631-35467993	TEAD3 (-2951)
chr6:35569633-35570087	TULP1 (-89213), FKBP5 (+86859)
chr6:35749890-35750673	C6orf127 (+1451), CLPS (+14839)
chr6:36067034-36067447	MAPK13 (-31021), MAPK14 (+71787)
chr6:36086009-36086906	MAPK13 (-11804), MAPK14 (+91004)
chr6:36341472-36341844	ETV7 (+13919), PNPLA1 (+103421)
chr6:37230539-37230859	RNF8 (-91049), TBC1D22B (+5151)
chr6:38047360-38047733	ZFAND3 (+260240), BTBD9 (+560377)
chr6:38117971-38118850	ZFAND3 (+331104), BTBD9 (+489513)
chr6:38207593-38208389	BTBD9 (+399933), ZFAND3 (+420684)
chr6:38411357-38412024	BTBD9 (+196233), ZFAND3 (+624384)
chr6:38428277-38428348	BTBD9 (+179611), ZFAND3 (+641006)
chr6:38759938-38760713	GLP1R (-256231), DNAH8 (+77209)
chr6:38770749-38771349	GLP1R (-245508), DNAH8 (+87932)
chr6:40364310-40364893	MOCS1 (-469147), LRFN2 (+190524)
chr6:40875079-40875622	LRFN2 (-320225), UNC5CL (+131587)
chr6:41715303-41715732	PGC (-379)
chr6:41752191-41752829	FRS3 (-4880), TOMM6 (-1990)
chr6:42084753-42085559	GUCA1A (-37988), TAF8 (+66905)
chr6:42085757-42086822	GUCA1A (-36854), TAF8 (+68039)
chr6:42096675-42097438	GUCA1A (-26087), TAF8 (+78806)
chr6:42192040-42192588	MRPS10 (-6681), TRERF1 (+227469)
chr6:42194422-42195075	MRPS10 (-9116), TRERF1 (+225034)
chr6:42195120-42195733	MRPS10 (-9794), TRERF1 (+224356)
chr6:42922027-42922513	GNMT (-6230), CNPY3 (+25410)
chr6:43770936-43771297	VEGFA (+33171), MRPL14 (+324074)
chr6:43878381-43878927	VEGFA (+140708), MRPL14 (+216537)
chr6:44026135-44026814	MRPL14 (+68716), VEGFA (+288529)
chr6:44077926-44078561	MRPL14 (+16947), VEGFA (+340298)
chr6:44628983-44629732	RUNX2 (-666696), CDC5L (+274107)
chr6:45503531-45504023	SUPT3H (-158107), CLIC5 (+544308)
chr6:45522192-45523134	SUPT3H (-176993), CLIC5 (+525422)
chr6:45523547-45524349	SUPT3H (-178278), CLIC5 (+524137)
chr6:45576608-45576734	SUPT3H (-231001), CLIC5 (+471414)
chr6:46983761-46984986	GPR116 (-94660), GPR110 (+25708)
chr6:47015096-47015657	GPR110 (-5295), TNFRSF21 (+262303)
chr6:49635544-49636448	RHAG (-31409), CRISP2 (+45303)
chr6:49644279-49644977	RHAG (-40041), CRISP2 (+36671)
chr6:51337267-51337557	TFAP2B (+550973), PKHD1 (+615011)
chr6:51756607-51756989	PKHD1 (+195625), TFAP2B (+970359)
chr6:52416357-52417322	TRAM2 (+25022), EFHC1 (+131846)
chr6:53039644-53040152	GCM1 (-26274), ELOVL5 (+174079)
chr6:53329258-53330295	ELOVL5 (-115800), GCLC (+80150)
chr6:53330418-53331016	ELOVL5 (-116740), GCLC (+79210)
chr6:53333842-53334351	ELOVL5 (-120120), GCLC (+75830)
chr6:54712285-54712808	HCRTR2 (-326524), TINAG (+539344)
chr6:55623235-55623802	HMGCLL1 (-179507), BMP5 (+116856)
chr6:65484665-65485062	AK302514 (-526490)
chr6:67795703-67797062	NONE
chr6:68002183-68002653	NONE
chr6:68389267-68390011	BAI3 (-955993)
chr6:72074686-72075268	RIMS1 (-521673), OGFRL1 (+76500)
chr6:72075476-72075539	RIMS1 (-521142), OGFRL1 (+77031)
chr6:73623600-73624046	KCNQ5 (+292252), KHDC1 (+349084)
chr6:73737217-73739018	KHDC1 (+234789), KCNQ5 (+406547)
chr6:73839446-73840231	KHDC1 (+133068), KCNQ5 (+508268)
chr6:75913463-75913996	COL12A1 (+1893)
chr6:83074266-83074628	TPBG (+486)
chr6:83277107-83277954	TPBG (+203570), UBE2CBP (+498014)
chr6:83278087-83278799	TPBG (+204482), UBE2CBP (+497102)
chr6:83279093-83279171	TPBG (+205171), UBE2CBP (+496413)
chr6:83279350-83280656	TPBG (+206042), UBE2CBP (+495542)
chr6:83333910-83334346	TPBG (+260167), UBE2CBP (+441417)
chr6:83660805-83661741	UBE2CBP (+114272), TPBG (+587312)
chr6:83718426-83718911	UBE2CBP (+56876), TPBG (+644708)
chr6:83761462-83761914	UBE2CBP (+13857), TPBG (+687727)
chr6:86289299-86289716	SNX14 (+14121), NT5E (+130206)
chr6:88441514-88442313	SPACA1 (-315593), AKIRIN2 (-29929)
chr6:90924597-90925065	BACH2 (+81796), GJA10 (+320643)
chr6:96897878-96898899	UFL1 (-71313), FUT9 (+434544)
chr6:99632541-99633118	FBXL4 (-236981), COQ3 (+209252)
chr6:99633286-99633662	FBXL4 (-237625), COQ3 (+208608)
chr6:99633881-99633948	FBXL4 (-238066), COQ3 (+208167)
chr6:99634133-99634977	FBXL4 (-238706), COQ3 (+207527)
chr6:99635212-99635345	FBXL4 (-239430), COQ3 (+206803)
chr6:105807771-105808257	POPDC3 (-180156), PREP (+42985)
chr6:105821764-105822441	POPDC3 (-194245), PREP (+28896)
chr6:106055224-106055427	PRDM1 (-478869), PREP (-204327)
chr6:106056025-106056466	PRDM1 (-477949), PREP (-205247)
chr6:106057149-106057797	PRDM1 (-476722), PREP (-206474)
chr6:106076143-106076896	PRDM1 (-457675), PREP (-225521)
chr6:106243802-106244382	PREP (-393093), PRDM1 (-290103)
chr6:106567314-106567994	PRDM1 (+33459), ATG5 (+206041)
chr6:110805491-110806013	SLC22A16 (-7908), CDK19 (+330660)
chr6:110834333-110834530	SLC22A16 (-36588), CDK19 (+301980)
chr6:110876000-110876630	SLC22A16 (-78471), CDK19 (+260097)
chr6:112339849-112340752	FYN (-299036), WISP3 (-35070)
chr6:112360094-112361162	FYN (-319363), WISP3 (-14743)
chr6:113651527-113652200	MARCKS (-526663), RFPL4B (+983332)
chr6:113771060-113771891	MARCKS (-407051)
chr6:114203539-114204006	MARCKS (+25246), HDAC2 (+88586)
chr6:119767825-119768155	MAN1A1 (-97064)
chr6:119797169-119797811	MAN1A1 (-126564)
chr6:120004002-120004924	MAN1A1 (-333537)
chr6:121831812-121832276	HSF2 (-888652), GJA1 (+75299)
chr6:122354606-122355004	HSF2 (-365891), GJA1 (+598060)
chr6:123013033-123013659	FABP7 (-87300), PKIB (+81969)
chr6:125422737-125423194	TPD52L1 (-51913), RNF217 (+118452)
chr6:125475868-125476466	TPD52L1 (+1288), HDDC2 (+147115)
chr6:125519340-125519575	TPD52L1 (+44579), HDDC2 (+103824)
chr6:125522968-125523793	TPD52L1 (+48502), HDDC2 (+99901)
chr6:125905681-125906300	HDDC2 (-282709), HEY2 (-164741)
chr6:125906431-125906700	HDDC2 (-283284), HEY2 (-164166)
chr6:131950625-131951253	MED23 (-1576)
chr6:131951540-131951634	MED23 (-2224)
chr6:131952582-131953193	MED23 (-3525)
chr6:132144448-132144876	ENPP1 (+15506), CTGF (+127856)
chr6:132165322-132165814	ENPP1 (+36412), CTGF (+106950)
chr6:133756129-133757059	TCF21 (-453665), EYA4 (+194099)
chr6:134430647-134431158	SLC2A12 (-57114), SGK1 (+208293)
chr6:135532221-135533005	MYB (+30160), AHI1 (+286290)
chr6:135533416-135534073	MYB (+31292), AHI1 (+285158)
chr6:135572465-135573120	MYB (+70340), AHI1 (+246110)
chr6:135591824-135592176	MYB (+89547), AHI1 (+226903)
chr6:135592178-135592662	MYB (+89967), AHI1 (+226483)
chr6:137366034-137366389	IL20RA (+86)
chr10:98623382-98624437	PIK3AP1 (-143631), C10orf12 (-117131)
chr10:99096657-99097551	FRAT2 (-2646)
chr10:100253938-100254453	HPS1 (-47492), HPSE2 (+741436)
chr10:101034929-101035461	CNNM1 (-53661), HPSE2 (-39563)
chr10:102132887-102133828	WNT8B (-89454), SCD (+26586)
chr10:103391528-103392109	POLL (-43792), FBXW4 (+62924)
chr10:103606600-103607054	KCNIP2 (-3150)
chr10:103653339-103654007	KCNIP2 (-49996), C10orf76 (+162259)
chr10:103724805-103725435	KCNIP2 (-121443), C10orf76 (+90812)
chr10:104418045-104418601	TRIM8 (+14071), ARL3 (+55867)
chr10:104528941-104530132	C10orf26 (+25810), CYP17A1 (+67753)
chr10:106239893-106241256	SORCS3 (-160284), ITPRIP (-146912)
chr10:106295684-106296216	ITPRIP (-202287), SORCS3 (-104909)
chr10:111662613-111663170	XPNPEP1 (+20419)
chr10:111736933-111737751	XPNPEP1 (-54031), ADD3 (-30369)
chr10:112191001-112191105	SMNDC1 (-126346), DUSP5 (-66572)
chr10:112549320-112550186	PDCD4 (-81800), RBM20 (+145598)
chr10:112550223-112551371	PDCD4 (-80756), RBM20 (+146642)
chr10:112581883-112583680	PDCD4 (-48771), RBM20 (+178627)
chr10:112597100-112597558	PDCD4 (-34224), RBM20 (+193174)
chr10:112645689-112646248	PDCD4 (+14416), BBIP1 (+33155)
chr10:112866796-112867268	ADRA2A (+30242)
chr10:112867446-112867711	ADRA2A (+30789)
chr10:114564102-114564492	TCF7L2 (-145712), VTI1A (+357541)
chr10:115681483-115682310	ADRB1 (-121909), DCLRE1A (-68038)
chr10:115686914-115687711	ADRB1 (-116493), DCLRE1A (-73454)
chr10:115816763-115817202	TDRD1 (-122046), ADRB1 (+13177)
chr10:119876326-119876937	RAB11FIP2 (-70518), PRLHR (+478528)
chr10:120002838-120003054	RAB11FIP2 (-196832), PRLHR (+352214)
chr10:120045192-120045827	RAB11FIP2 (-239396), PRLHR (+309650)
chr10:120116048-120116696	RAB11FIP2 (-310258), PRLHR (+238788)
chr10:120784748-120785183	NANOS1 (-4262)
chr10:121423493-121424187	INPP5F (-61719), BAG3 (+12958)
chr10:121427409-121427849	INPP5F (-57930), BAG3 (+16747)
chr10:122705517-122705929	WDR11 (+95036), FGFR2 (+652249)
chr10:122814479-122814848	WDR11 (+203977), FGFR2 (+543308)
chr10:123273904-123274446	FGFR2 (+83797), WDR11 (+663488)
chr10:124986772-124987161	GPR26 (-438904), BUB3 (+73207)
chr10:124987255-124987679	GPR26 (-438404), BUB3 (+73707)
chr10:126697196-126697682	CTBP2 (+19014), ZRANB1 (+66747)
chr10:126712849-126713357	CTBP2 (+3350), ZRANB1 (+82411)
chr10:127313186-127314948	CTBP2 (-597614), C10orf137 (-94017)
chr10:127334799-127335489	CTBP2 (-618691), C10orf137 (-72940)
chr10:127525251-127525797	BCCIP (+13420), DHX32 (+44360)
chr10:128606715-128607578	NPS (-740466), DOCK1 (+13124)
chr10:133829573-133830040	JAKMIP3 (-88506), BNIP3 (-34372)
chr10:134813349-134813957	GPR123 (-70780), TTC40 (-57564)
chr11:737950-738492	TALDO1 (-9211), EPS8L2 (+32101)
chr11:819074-819075	PNPLA2 (+174)
chr11:820182-820353	EFCAB4A (-7317), PNPLA2 (+1367)
chr11:957204-957547	AP2A2 (+31567), MUC6 (+79330)
chr11:1760450-1760809	IFITM10 (+11194), KRTAP5-6 (+42205)
chr11:1793702-1794193	SYT8 (-61726), CTSD (-8726)
chr11:1817287-1818429	SYT8 (-37816), CTSD (-32636)
chr11:1848377-1848973	CTSD (-63453), SYT8 (-6999)
chr11:1849320-1849789	CTSD (-64333), SYT8 (-6119)
chr11:1849794-1850757	CTSD (-65054), SYT8 (-5398)
chr11:1855122-1855856	SYT8 (-185)
chr11:2214491-2214949	TH (-21685), ASCL2 (+77462)
chr11:2933810-2934077	SLC22A18AS (-8769), PHLDA2 (+16706)
chr11:3021739-3022319	NAP1L4 (-8422), CARS (+56652)
chr11:7559883-7560392	PPFIBP2 (+25137), CYB5R2 (+134683)
chr11:7621408-7621986	CYB5R2 (+73124), PPFIBP2 (+86696)
chr11:9098091-9098565	NRIP3 (-72732), SCUBE2 (+14822)
chr11:9120124-9120638	SCUBE2 (-7231), DENND5A (+166492)
chr11:9124874-9125410	SCUBE2 (-11992), DENND5A (+161731)
chr11:9590148-9590790	WEE1 (-4759)
chr11:10373315-10373939	AMPD3 (-98597), ADM (+46985)
chr11:10953779-10954132	ZBED5 (-74336), CSNK2A1 (+420948)
chr11:12269155-12269557	MICALCL (-39091), MICAL2 (+137218)
chr11:12269753-12270505	MICALCL (-38318), MICAL2 (+137991)
chr11:13808195-13808643	SPON1 (-175765), FAR1 (+118213)
chr11:14276057-14276953	RRAS2 (+104225), SPON1 (+292321)
chr11:14611019-14611534	PSMA1 (-69286), PDE3B (-53992)
chr11:15307296-15307706	INSC (+173531)
chr11:15307775-15308716	INSC (+174276)
chr11:15308801-15309092	INSC (+174977)
chr11:15335282-15335903	INSC (+201623)
chr11:15636817-15637732	INSC (+503305), SOX6 (+787138)
chr11:15639770-15640705	INSC (+506268), SOX6 (+784175)
chr11:16915040-16915577	PLEKHA7 (+120654), C11orf58 (+155161)
chr11:17003327-17003952	PLEKHA7 (+32323), C11orf58 (+243492)
chr11:17007997-17008592	PLEKHA7 (+27668), C11orf58 (+248147)
chr11:17008608-17009201	PLEKHA7 (+27058), C11orf58 (+248757)
chr11:17010860-17011441	PLEKHA7 (+24812), C11orf58 (+251003)
chr11:17427169-17427736	KCNJ11 (-17247), ABCC8 (+70996)
chr11:17832750-17833458	KCNC1 (+75609), SERGEF (+201533)
chr11:17833709-17835706	KCNC1 (+77213), SERGEF (+199929)
chr11:20002718-20003417	DBX1 (+178802), NAV2 (+268187)
chr11:20016338-20017190	DBX1 (+165106), NAV2 (+281883)
chr11:20057842-20058332	DBX1 (+123783), NAV2 (+323206)
chr11:28526341-28527265	METTL15 (+397005)
chr11:30382098-30382674	C11orf46 (+37737), MPPED2 (+219655)
chr11:30568548-30569237	MPPED2 (+33148), C11orf46 (+224244)
chr11:32442312-32443118	WT1 (+14366), RCN1 (+330238)
chr11:32443178-32443627	WT1 (+13678), RCN1 (+330926)
chr11:34247810-34248290	NAT10 (+120939), ABTB2 (+131505)
chr11:34581966-34582578	EHF (-71739), ELF5 (-46925)
chr11:34592014-34592794	EHF (-61607), ELF5 (-57057)
chr11:34654788-34654863	EHF (+815)
chr11:34654875-34656301	PDHX (-282089), EHF (+1577)
chr11:34661344-34662438	PDHX (-275786), EHF (+7880)
chr11:34675158-34676172	PDHX (-262012), EHF (+21654)
chr11:34676253-34677205	PDHX (-260948), EHF (+22718)
chr11:34686451-34687580	PDHX (-250661), EHF (+33005)
chr11:34688774-34689354	PDHX (-248613), EHF (+35053)
chr11:34689486-34690367	PDHX (-247750), EHF (+35916)
chr11:34771413-34772210	PDHX (-165865), EHF (+117801)
chr11:34778549-34779117	PDHX (-158844), EHF (+124822)
chr11:34844614-34845169	PDHX (-92785), EHF (+190881)
chr11:34847528-34848578	PDHX (-89624), EHF (+194042)
chr11:34908662-34909329	PDHX (-28681), EHF (+254985)
chr11:35317195-35317963	SLC1A2 (+123526), CD44 (+157162)
chr11:35385473-35385926	SLC1A2 (+55405), CD44 (+225283)
chr11:35411152-35412001	SLC1A2 (+29528), CD44 (+251160)
chr11:35412386-35413741	SLC1A2 (+28041), CD44 (+252647)
chr11:35575292-35575992	FJX1 (-64093), PAMR1 (-28466)
chr11:35589080-35590056	FJX1 (-50167), PAMR1 (-42392)
chr11:35642598-35643585	TRIM44 (-41261), FJX1 (+3357)
chr11:35643612-35643794	TRIM44 (-40650), FJX1 (+3968)
chr11:36033836-36034484	PRR5L (-363375), LDLRAD3 (+68548)
chr11:36037938-36038745	PRR5L (-359193), LDLRAD3 (+72730)
chr11:36056124-36057340	PRR5L (-340803), LDLRAD3 (+91120)
chr11:36167533-36168476	PRR5L (-229530), LDLRAD3 (+202393)
chr11:37109559-37110653	RAG2 (-490277)
chr11:38959060-38959748	NONE
chr11:40350385-40351273	LRRC4C (-35165)
chr11:44586505-44586944	CD82 (-416)
chr11:45007308-45008005	TP53I11 (-35049), SYT13 (+300227)
chr11:45956091-45956507	GYLTL1B (+13103), PHF21A (+186686)
chr11:46493532-46494165	CHRM4 (-85742), AMBRA1 (+119065)
chr11:46510829-46511857	CHRM4 (-103236), AMBRA1 (+101571)
chr11:47210682-47211489	PACSIN3 (-3076)
chr11:47327249-47327817	MADD (+36334), MYBPC3 (+46720)
chr11:47598667-47599647	NDUFS3 (-1405)
chr11:48019886-48020741	OR4B1 (-218048), PTPRJ (+18204)
chr11:48063372-48063962	OR4B1 (-174695), PTPRJ (+61557)
chr11:48071356-48071971	OR4B1 (-166698), PTPRJ (+69554)
chr11:48075735-48076331	OR4B1 (-162329), PTPRJ (+73923)
chr11:48077163-48077959	OR4B1 (-160801), PTPRJ (+75451)
chr11:48107905-48108498	OR4B1 (-130160), PTPRJ (+106092)
chr11:48112639-48113154	OR4B1 (-125465), PTPRJ (+110787)
chr11:50114595-50115375	OR4C12 (-110914)
chr11:57018433-57018985	APLNR (-13782), TNKS1BP1 (+73704)
chr11:57045343-57046107	APLNR (-40798), TNKS1BP1 (+46688)
chr6:138548459-138548866	HEBP2 (-176673), PBOV1 (-9036)
chr6:138552408-138553147	HEBP2 (-172558), PBOV1 (-13151)
chr6:138580167-138580587	HEBP2 (-144959), PBOV1 (-40750)
chr6:138708668-138709013	PBOV1 (-169214), HEBP2 (-16495)
chr6:138903527-138904154	ECT2L (-213407), HEBP2 (+178505)
chr6:138985123-138985414	ECT2L (-131979), HEBP2 (+259933)
chr6:139696399-139697072	CITED2 (-1386)
chr6:139697656-139698680	CITED2 (-2818)
chr6:140298741-140299608	CITED2 (-603825)
chr6:140783814-140784546	NONE
chr6:144012401-144012715	PHACTR2 (+13456), PLAGL1 (+316983)
chr6:145432308-145433077	EPM2A (+624298), UTRN (+819820)
chr6:145510927-145511386	EPM2A (+545834), UTRN (+898284)
chr6:148058905-148060127	STXBP5 (+534022)
chr6:148561022-148561413	UST (-507053)
chr6:148578876-148579397	UST (-489134)
chr6:148579743-148580640	UST (-488079)
chr6:148666364-148666848	UST (-401665)
chr6:149351945-149353577	TAB2 (-286675), UST (+284490)
chr6:149353987-149354016	TAB2 (-285434), UST (+285731)
chr6:149381670-149382011	TAB2 (-257595), UST (+313570)
[truncated: 2,360 more rows]
